# Supplementary material
Source: PubMed Central journal article supplement (PMC10575964)
Supplement: 41416_2023_2410_MOESM1_ESM.pdf [file 41416_2023_2410_MOESM1_ESM.pdf]

## Effect of a 1-year physical activity intervention on cardiovascular health in long-term childhood cancer survivors – A randomised controlled trial (SURfit)

Corina S Rueegg<sup>1</sup>, Simeon J Zürcher<sup>2</sup>, Christina Schindera<sup>3</sup>, Ruedi Jung<sup>4</sup>, Wei H. Deng<sup>1</sup>, Iris Banteli<sup>5</sup>, Jonathan Schaeff<sup>6</sup>, Helge Hebestreit<sup>7</sup>, Nicolas X. von der Weid<sup>3\*</sup>, Susi Kriemler<sup>4\*</sup>

### ONLINE APPENDIX

#### Table of Contents

|                                                                                                                                                                                                                                                      |    |
|------------------------------------------------------------------------------------------------------------------------------------------------------------------------------------------------------------------------------------------------------|----|
| 1. SUPPLEMENTARY eMETHODS .....                                                                                                                                                                                                                      | 2  |
| 2. SUPPLEMENTARY REFERENCES .....                                                                                                                                                                                                                    | 4  |
| 3. SUPPLEMENTARY TABLES .....                                                                                                                                                                                                                        | 5  |
| eTable 1. Overview of primary and secondary outcomes analysed and displayed .....                                                                                                                                                                    | 6  |
| eTable 2. Participants in the different groups of the per protocol analyses according to their compliance, stratified by originally randomized group .....                                                                                           | 9  |
| eTable 3. Description of all outcomes by study time point and per protocol 1 allocation, assumed intervention and control .....                                                                                                                      | 10 |
| eTable 4. Description of all outcomes by study time point and per protocol 2 allocation, reported compliance (missing entries imputed with zero physical activity) .....                                                                             | 13 |
| eTable 5: Description of all outcomes by study time point and per protocol 3 allocation, reported compliance (missing entries imputed with mean annual physical activity level) .....                                                                | 16 |
| eTable 6. Intervention effect (marginal mean difference from randomization) of all continuous secondary outcomes at each study time point with intention-to-treat allocation (ITT, as randomized); from mixed effects generalized linear model ..... | 19 |
| eTable 7. Intervention effect (marginal mean difference from randomization) of all secondary continuous outcomes at each study time point with per protocol allocation 1; from mixed effects generalized linear model .....                          | 21 |
| eTable 8. Intervention effect (marginal mean difference from randomization) of all secondary continuous outcomes at each study time point with per protocol allocation 2; from mixed effects generalized linear model .....                          | 23 |
| eTable 9. Intervention effect (marginal mean difference from randomization) of all secondary continuous outcomes at each study time point with per protocol allocation 3; from mixed effects generalized linear model .....                          | 25 |
| eTable 10: Description of all outcomes by study time point and physical activity dose group .....                                                                                                                                                    | 27 |
| eTable 11. Dose-response relationship between reached physical activity goal <sup>a</sup> and all continuous outcomes; from linear regression model <sup>b</sup> .....                                                                               | 30 |

|                                                                                                                                                                                |    |
|--------------------------------------------------------------------------------------------------------------------------------------------------------------------------------|----|
| eTable 13. Overview of adverse events (N=170).....                                                                                                                             | 32 |
| eTable 14. Description of adverse events according to CTCAE categories (N=170) .....                                                                                           | 33 |
| 4. SUPPLEMENTARY FIGURES.....                                                                                                                                                  | 34 |
| eFigure 1. Individual trajectories for the primary and secondary continuous outcomes by randomized group allocation (ITT).....                                                 | 35 |
| eFigure 2. Marginal mean changes of the remaining secondary continuous outcomes for the intention-to-treat (ITT) and three per protocol (PP) analyses.....                     | 37 |
| eFigure 3. Description of the categorical study outcomes by randomized group allocation (ITT) and study time point.....                                                        | 42 |
| eFigure 4. Dose-response relationship between the proportion of physical activity goal reached and each continuous outcome.....                                                | 44 |
| eFigure 5. Marginal mean changes of the CVD risk score (primary outcome) over time for the intention-to-treat (ITT) allocation, by study group and anthracycline received..... | 46 |
| 5. ORIGINAL DOCUMENTS OF THE PHYSICAL ACTIVITY INTERVENTION.....                                                                                                               | 48 |

## 1. SUPPLEMENTARY eMETHODS

### *Study population: inclusion and exclusion criteria*

Eligible participants were identified by the Swiss Childhood Cancer Registry (SCCR).<sup>1,2</sup> The SURfit study included CCS aged <16 years at diagnosis, diagnosed with a cancer classifiable according to the International Classification of Childhood Cancer (ICCC-3)<sup>3</sup> or Langerhans Cell Histiocytosis, who were diagnosed and treated at a clinic of the Swiss Paediatric Oncology Group (SPOG), survived  $\geq 5$  years since primary cancer diagnosis or any subsequent cancer event (relapse or 2<sup>nd</sup> tumour), and were aged  $\geq 16$  years at baseline of the study. Participants had to agree that they will commit to the conditions of their study group allocation prior to the allocation and independent of the allocation.

The presence of any of the following criteria, assessed at baseline, lead to exclusion of the participant: participation in another clinical trial, inability to exercise or exercise potentially harmful, pregnant or breast feeding, cardiac arrhythmias under exercise, diagnosis of diabetes <3 months previously, detection or presence of a clinical condition that needs immediate treatment, planned surgeries within the subsequent 12 months that interfere with physical exercising, major musculoskeletal injuries/fractures <2 months previously, change in medication that interfere with the parameters of the CVD risk score <1 month previously, >4 hours of reported vigorous physical activities per week, or, inability to follow the procedures and understand the intervention and assessments of the study, e.g. due to cognitive impairment, language problems, or psychological disorders.

We decided to include a general population of long-term survivors of childhood cancer and not only survivors at high risk for cardiovascular late-effects in order to make our results generalizable to all long-term childhood cancer survivors.

### *Recruitment*

Eligible patients were contacted with an information letter from their former treating hospital including a short study information brochure. Interested survivors received the detailed patient information of the study and the informed consent. All survivors who did not react to the initial study information letter were followed-up by a phone call. Survivors who decided to participate were invited for the baseline assessment where final decision on eligibility was made and the informed consent obtained. We recorded the reasons for non-participation of each contacted survivor who did not want to participate. In addition, basic information on demographics and clinical factors were available from the SCCR on all non-participants.

### **Assessments**

Within the SURfit study, we performed assessments at baseline (T0) and after three (T3), six (T6), and 12 (T12) months. The assessments at T0, T6 and T12 comprised of two visits (a and b, respectively) in the study centre, 14 days apart, and T3 of one visit. The assessments within SURfit have been described in detail.<sup>4,7</sup> For the current analysis we only included information assessed at T0, T6 and T12.

Waist circumference (assessed at T0, T3, T6, T12) was measured with a medical measuring tape. Standing height and weight (assessed at T0, T3, T6, T12) were measured by standard procedures, barefoot and in underwear. Systolic and diastolic blood pressure (assessed at T0, T3, T6, T12) were measured by automated oscillography (DINAMAP® ProCare). Two readings were taken and a third one if the first two differed by >5 mmHg.<sup>8</sup> The mean of the nearest two readings was used for the analysis. Blood was taken fastened in the morning (at T0, T6, T12), stored at -70°C and analysed in one batch at the end of the study. Blood samples were processed using Roche Cobas® 8000 modular analyser series (Roche Diagnostics, USA). Total body percent fat mass and absolute fat mass were estimated by whole body dual x-ray absorptiometry (DXA; at T0 and T12) using a Hologic Discovery densitometer (Hologic, Bedford MA, USA).<sup>9</sup> Peak performance was assessed (at T0, T6, T12) by a continuous incremental cycling test to volitional exhaustion following the step protocol by Godfrey and colleagues.<sup>10,11</sup> Peak performance (watt) was defined as the power maintained over the final 1-minute stage of the test plus 5 watt for each fulfilled 15 second bout of the non-finished stage. Hand grip strength was assessed (at T0, T6, T12) using the JAMAR Hydraulic Hand Dynamometer.<sup>12,13</sup> Each hand was measured 3 times, with alternating sides. The mean strength in the dominant and non-dominant hand were calculated for the current analysis. Leg strength and endurance was assessed (at T0, T6, T12) by the 1-minute sit-to-stand (STS) test.<sup>14,15</sup> The participants performed one test trial at least 20 minutes before the final test. The number of repetitions of standing up and sitting down in the final test was used in the analysis. Physical activity was assessed by ActiGraph® GT3X+ (Pensacola, Florida, USA) accelerometer (100Hz, 60s epochs) worn between the two visits at T0, T6 and T12. Participants were asked to wear the accelerometer all the time, except for water based activities, and even during night-time. For the current analysis, time was restricted to activities between 06:00 a.m. to 10:00 p.m. using the manufacturer's software (ActiLife 6.13.4). Accelerometers were worn on average over 11 days (interquartile range (IQR) 8 to 13 days) with a median wear time of 14.2 hours/day (IQR 13.5 to 15.1). Total physical activity counts, daily minutes spent in moderate-to-vigorous physical activities (MVPA), and daily minutes spent sedentary were calculated using the ActiLife v6.13.4. Software. Daily averages were calculated by dividing the total by valid days ( $\geq 10$ h wear-time between 6am and 10pm). MVPA was defined as  $\geq 2020$  counts/min and sedentary time as  $< 100$  counts/min.<sup>16</sup> Daily overall and aerobic steps were assessed by pedometer (Fitbug Air) worn for the same period than the accelerometer. Total number of steps were averaged over all valid days ( $\geq 100$  and  $\leq 50000$  steps).<sup>17</sup>

### **Covariates, baseline demographics and safety**

We extracted date of birth, sex, date of diagnosis, cancer diagnosis, and information on relapse(s), secondary cancer(s) and cancer treatment from the participants' medical records. We calculated age at study (date of baseline assessment), age at first cancer diagnosis and time since last cancer diagnosis in years. Cancer diagnoses were categorized according to the International Classifications of Childhood Cancer – 3<sup>rd</sup> edition (ICCC-3).<sup>3</sup> For cancer treatment, we extracted information on cancer resection surgery(ies), chemotherapy, radiotherapy including location and dose, and stem cell transplantation. We calculated cumulative doses of anthracyclines (Doxorubicin isotoxic equivalent dose, mg/m<sup>2</sup>)<sup>18</sup> and cumulative doses of steroids (g/m<sup>2</sup>).<sup>19</sup> At each study time point participants were asked to report any adverse events that occurred since the last visit. In case of an adverse event the following information was assessed: description of event, severity, start and end date, outcome, relationship to the intervention, consequence of the event. All adverse events were classified according to the Common Terminology Criteria for Adverse Events (CTCAE) 4th edition.<sup>20</sup>

### **Sample size**

A study by Kriemler and colleagues using the same composite CVD risk score showed a reduction in the z-score by 14% after a 1-year physical activity intervention in children and adolescents.<sup>21</sup> Based on this, we powered our study to detect a difference between the intervention and control group of 15% after the 1-year intervention. For a power of 0.80 and a two-sided type 1 error probability of 0.05, 60 survivors were required in each arm.<sup>22</sup>

### **Intervention and control conditions**

Survivors in the intervention group were asked to add at least 2.5 h of intense physical activities per week. These should include 30 min of strength building exercises and 2 h of aerobic exercises per week. Exercise bouts

lasting 20 min or longer were counted towards the total weekly training time. This “dose” of physical activity was based on the international recommendations of healthy physical activities from the Centre of Disease Control and Prevention (CDC; [www.cdc.gov](http://www.cdc.gov)). Based on the initial physical activity levels, physical fitness tests, general health status and participant’s preferences and motivation, subjects of the intervention group received a counselling at the second visit of the baseline assessment. A standardized approach was used to assess survivors’ preferences with respect to physical activities, identify possible barriers and determine the individual motivation to start specific activities. Based on this assessment, individualized physical activities were defined and implemented into the participant’s daily life. Survivors of the intervention group were also motivated to incorporate activities of moderate intensities into daily life such as active commuting or climbing stairs instead of taking the escalator. The motivational interviews were performed by one of the project physiotherapists who were trained prior to the study. For motivational reasons each survivor of the intervention group was equipped with a step counter (pedometer, Model Fitbug Air) and asked to document daily steps. Participants kept a daily training log using a web-based platform with individual anonymous logins. Data on 1) strenuous exercise performed that day (type of exercise, duration), 2) step counts (overall and aerobic steps), 3) media-related sedentary time and sleeping hours, and 4) mood and well-being were entered and graphically displayed to give the participants immediate feedback about their progress. The participants received a “reminder” message if no entries were made for three consecutive days. If no entries were made for a whole week, the survivor was contacted by phone by his/her “personal coach” (physiotherapist). There were also scheduled phone contacts after 1, 2, 4, 5, 8 and 10 months of the intervention to discuss compliance, motivation, and progress and to re-counsel the survivors on their training plan. Training logs and physical activity behaviour were checked and discussed during the clinic visits (at months 3 and 6), and exercise counselling repeated.

Participants of the control group were asked to keep their activity level constant over the one-year study period. Receiving no specific information or recommendation on physical activity behaviour is the current standard of care during follow-up care of childhood cancer survivors in Switzerland.

This type of personalized intervention allowed us to test the effect of additional physical activity compared to a “normal” activity level.

### ***Change in model to assess the treatment effect***

In the published protocol article, we planned to analyse the treatment effect using a mixed model with last observation carried forward (LOCF) as primary analysis and complete case as secondary analysis. When pre-defining and refining the methods in detail for the statistical analysis plan (SAP) we slightly changed the statistical models for the outcomes presented in the current paper. Those changes were done a priori (before unblinding of the data) and based on knowledge gains in the field of analysis of RCTs since the start of the trial. We decided to rather exploit the nature of the repeated measures of this study and use the mixed model to handle missing data points instead of performing one model with LOCF and one based on complete cases.<sup>23</sup> We used the generalized linear mixed effects model to be able to set the treatment effect at baseline to zero by using a constraint on the parameter space.

## **2. SUPPLEMENTARY REFERENCES**

- 1 Michel, G. *et al.* Incidence of childhood cancer in Switzerland: The Swiss childhood cancer registry. *Pediatric Blood & Cancer* **50**, 46-51 (2008).
- 2 Michel, G. *et al.* The Swiss Childhood Cancer Registry: rationale, organisation and results for the years 2001–2005. *Swiss Medical Weekly* **137**, 502–509 (2007).
- 3 Steliarova-Foucher, E., Stiller, C., Lacour, B. & Kaatsch, P. International Classification of Childhood Cancer, third edition. *Cancer* **103**, 1457-1467 (2005).
- 4 Rueegg, C. S. *et al.* A partially supervised physical activity program for adult and adolescent survivors of childhood cancer (SURfit): study design of a randomized controlled trial [NCT02730767]. *BMC Cancer* **17**, 822 (2017).
- 5 Schindera, C. *et al.* Physical fitness and modifiable cardiovascular disease risk factors in survivors of childhood cancer: A report from the SURfit study. *Cancer* 10.1002/cncr.33351 (2021).

- 6 Zurcher, S. J. *et al.* High impact physical activity and bone health of lower extremities in childhood cancer survivors: A cross-sectional study of SURfit. *Int J Cancer* 10.1002/ijc.32963 (2020).
- 7 Schindera, C. *et al.* Pulmonary Dysfunction after Treatment for Childhood Cancer. Comparing Multiple-Breath Washout with Spirometry. *Annals of the American Thoracic Society* **18**, 281-289 (2021).
- 8 Pickering, T. G. *et al.* Recommendations for blood pressure measurement in humans: an AHA scientific statement from the Council on High Blood Pressure Research Professional and Public Education Subcommittee. *Journal of clinical hypertension (Greenwich, Conn.)* **7**, 102-109 (2005).
- 9 Plank, L. D. Dual-energy X-ray absorptiometry and body composition. *Current opinion in clinical nutrition and metabolic care* **8**, 305-309 (2005).
- 10 Godfrey, S. Exercise tests in assessing children with lung or heart disease. *Thorax* **25**, 258 (1970).
- 11 ATS/ACCP Statement on cardiopulmonary exercise testing. *Am J Respir Crit Care Med* **167**, 211-277 (2003).
- 12 Roberts, H. C. *et al.* A review of the measurement of grip strength in clinical and epidemiological studies: towards a standardised approach. *Age and ageing* **40**, 423-429 (2011).
- 13 Fess, E. E. *Grip Strength*. 2nd edn, (American Society of Hand Therapists: Chicago, 1992).
- 14 Strassmann, A. *et al.* Population-based reference values for the 1-min sit-to-stand test. *Int J Public Health* **58**, 949-953 (2013).
- 15 Puhan, M. A., Siebeling, L., Zoller, M., Muggensturm, P. & ter Riet, G. Simple functional performance tests and mortality in COPD. *Eur Respir J* **42**, 956-963 (2013).
- 16 Troiano, R. P. *et al.* Physical Activity in the United States Measured by Accelerometer. *Med Sci Sports Exerc* **40**, 181-188 (2007).
- 17 Bassett, D. R., Jr., Wyatt, H. R., Thompson, H., Peters, J. C. & Hill, J. O. Pedometer-measured physical activity and health behaviors in U.S. adults. *Med Sci Sports Exerc* **42**, 1819-1825 (2010).
- 18 Children's Oncology Group. Long-Term Follow-Up Guidelines for Survivors of Childhood, Adolescent, and Young Adult Cancers, Version 5.0 - October 2018. . In: Vol. Version 5.0 (Children's Oncology Group (COG). 2018).
- 19 Inaba, H. & Pui, C. H. Glucocorticoid use in acute lymphoblastic leukaemia. *Lancet Oncol* **11**, 1096-1106 (2010).
- 20 Common Terminology Criteria for Adverse Events v4.0 (CTCAE). In: Vol. Version 4.0 (U.S. Department of Health and Human Services, National Institutes of Health, National Cancer Institute, 2009).
- 21 Kriemler, S. *et al.* Effect of school-based interventions on physical activity and fitness in children and adolescents: a review of reviews and systematic update. *Br J Sports Med* **45**, 923-930 (2011).
- 22 Rueegg, C. S. *et al.* The SURfit study - An RCT to investigate the effects of a one-year physical activity intervention in long-term survivors of childhood cancer, [osf.io/w6j4y](https://osf.io/w6j4y) Accessed 10.06.2021, (2021).
- 23 Tango, T. *Repeated Measures Design with Generalized Linear Mixed Models for Randomized Controlled Trials*. Vol. 1st edition (2020).

### 3. SUPPLEMENTARY TABLES

**eTable 1. Overview of primary and secondary outcomes analysed and displayed**

| Original outcome as described in <a href="https://clinicaltrials.gov">clinicaltrials.gov</a>                                                                                                                                                                             | Changes to the outcome after trial commencement                                                                                                                                                                  | Unit for the absolute display of the outcome                 | Unit for the standardized display of the outcome | Cut-off for categorized display of the outcome                        |
|--------------------------------------------------------------------------------------------------------------------------------------------------------------------------------------------------------------------------------------------------------------------------|------------------------------------------------------------------------------------------------------------------------------------------------------------------------------------------------------------------|--------------------------------------------------------------|--------------------------------------------------|-----------------------------------------------------------------------|
| <i>Primary Outcome:</i>                                                                                                                                                                                                                                                  |                                                                                                                                                                                                                  |                                                              |                                                  |                                                                       |
| Composite cardiovascular disease (CVD) risk score [z-score] [Time Frame: 6 and 12 months] (summarized mean z-score of waist circumference, blood pressure, HOMA-IR, inverted high-density lipoprotein cholesterol, triglycerides and inverted cardiorespiratory fitness) | We used fasting glucose instead of HOMA-IR in the composite score because it was not possible to find good reference values for HOMA-IR and HOMA-IR varies a lot depending on the laboratory measurement method. | n.a.                                                         | z-score                                          | z-score $\geq 1$                                                      |
| <i>Secondary Outcomes:</i>                                                                                                                                                                                                                                               |                                                                                                                                                                                                                  |                                                              |                                                  |                                                                       |
| <b>Single CVD risk factors:</b>                                                                                                                                                                                                                                          |                                                                                                                                                                                                                  |                                                              |                                                  |                                                                       |
| Waist circumference [cm] [Time Frame: 3, 6, and 12 months]                                                                                                                                                                                                               | Time point 3 months not displayed because of a lot of missing information <sup>a</sup>                                                                                                                           | cm                                                           |                                                  | $\geq 94$ cm in males, $\geq 80$ cm in females <sup>b</sup>           |
| Systolic and diastolic blood pressure [mmHg] [Time Frame: 3, 6, and 12 months]                                                                                                                                                                                           | Time point 3 months not displayed because of a lot of missing information <sup>a</sup>                                                                                                                           | mmHg                                                         |                                                  | $\geq 130$ mmHg systolic and/or $\geq 85$ mmHg diastolic <sup>b</sup> |
| Homeostasis Model Assessment Insulin Resistance (HOMA-IR) [Time Frame: 6 and 12 months] (calculated from insulin and glucose)                                                                                                                                            | HOMA-IR was replaced by fasting glucose [mmol/l] because we could not find good reference values and the results are extremely variable between laboratories                                                     | mmol/l                                                       |                                                  | $\geq 5.6$ mmol/l <sup>b</sup>                                        |
| HbA1c [mmol/mol] [Time Frame: 6 and 12 months]                                                                                                                                                                                                                           | Displayed in % instead of mmol/mol                                                                                                                                                                               | %                                                            |                                                  | $\geq 5.7\%$ <sup>c</sup>                                             |
| Insulin resistance from response to oral glucose tolerance test (oGTT) [Time Frame: 12 months] (Assessment of fasting glucose [mmol/l] and insulin [mIU/l] and glucose 2 hours after drinking of a glucose solution)                                                     |                                                                                                                                                                                                                  | mmol/l (absolute value at 2 hours and change from 0-2 hours) |                                                  | $\geq 7.8$ mmol/l at 2 hours of oGTT <sup>c</sup>                     |
| Inverted high-density lipoprotein cholesterol (HDL) [mmol/l] [Time Frame: 6 and 12 months]                                                                                                                                                                               | We did not invert HDL cholesterol when displayed as single secondary endpoint                                                                                                                                    | mmol/l                                                       |                                                  | $< 1.03$ mmol/l in males, $< 1.30$ mmol/l in females <sup>b</sup>     |

|                                                                                                                                                                                                          |                                                                                                                                                  |                   |                                             |
|----------------------------------------------------------------------------------------------------------------------------------------------------------------------------------------------------------|--------------------------------------------------------------------------------------------------------------------------------------------------|-------------------|---------------------------------------------|
| Low-density lipoprotein cholesterol (LDL) [mmol/l]<br>[Time Frame: 6 and 12 months]                                                                                                                      |                                                                                                                                                  | mmol/l            | ≥4.9 mmol/l <sup>d</sup>                    |
| Total cholesterol [mmol/l]<br>[Time Frame: 6 and 12 months]                                                                                                                                              | Outcome dropped because HDL and LDL are better markers for CVD than total cholesterol                                                            |                   |                                             |
| Triglycerides [mmol/l]<br>[Time Frame: 6 and 12 months]                                                                                                                                                  |                                                                                                                                                  | mmol/l            | ≥1.7 mmol/l <sup>b</sup>                    |
| Body mass index (BMI) [z-score]<br>[Time Frame: 3, 6, and 12 months] (Calculated from height and weight)                                                                                                 | Displayed it in kg/m <sup>2</sup> instead of a z-score<br>Time point 3 months not displayed because of a lot of missing information <sup>a</sup> | kg/m <sup>2</sup> | ≥25 kg/m <sup>2</sup> <sup>e</sup>          |
| Absolute [kg] and relative [%] body fat mass [Time Frame: 3, 6, and 12 months] (Assessed with 2 methods: skinfold measurement (3, 6, and 12 months) and dual x-ray absorptiometry (DXA, 12 months only)) | Only absolute and relative body fat mass assessed by DXA was analysed and displayed                                                              | kg and %          | ≥20% in males, ≥33% in females <sup>f</sup> |

---

**Physical fitness:**

|                                                                                                                                                     |                                                                                                                                |                           |                                              |
|-----------------------------------------------------------------------------------------------------------------------------------------------------|--------------------------------------------------------------------------------------------------------------------------------|---------------------------|----------------------------------------------|
| Peak oxygen uptake (VO <sub>2</sub> max) [ml/(kg*min) and % predicted]<br>[Time Frame: 6 and 12 months] (Assessed with maximal spiroergometry test) | Not analysed and displayed due to technical problems with the metabolic cart resulting in many missing and invalid information |                           |                                              |
| Peak performance [watt/kg and % predicted] [Time Frame: 6 and 12 months] (Assessed with maximal spiroergometry test)                                | Absolute (watt) and relative (watt/kg) performance was analysed and displayed                                                  | Watt/kg und watt          | % predicted of watt and watt/kg <sup>g</sup> |
| Hand grip strength in the left and right hand [kg] [Time Frame: 6 and 12 months] (Assessed with a hydraulic hand grip dynamometer)                  | Analysed and displayed as dominant and non-dominant hand instead of left and right hand                                        | kg                        |                                              |
| Leg strength and endurance [repetitions/min] [Time Frame: 6 and 12 months] (Assessed with the 1 minute sit-to-stand test)                           |                                                                                                                                | number of repetitions/min |                                              |

---

**Physical activity:**

|                                                                                                 |  |            |  |
|-------------------------------------------------------------------------------------------------|--|------------|--|
| Total physical activity [counts/min] [Time Frame: 6 and 12 months ] (Assessed by accelerometer) |  | counts/min |  |
|-------------------------------------------------------------------------------------------------|--|------------|--|

|                                                                                                                  |                                                                                  |                                                 |                                                          |
|------------------------------------------------------------------------------------------------------------------|----------------------------------------------------------------------------------|-------------------------------------------------|----------------------------------------------------------|
| Moderate to vigorous physical activities [minutes/day] [Time Frame: 6 and 12 months] (Assessed by accelerometer) |                                                                                  | min/day                                         | <150 min of MVPA/week (<21 min of MVPA/day) <sup>h</sup> |
| Sedentary behaviour [minutes/day] [Time Frame: 6 and 12 months] (Assessed by accelerometer)                      |                                                                                  | min/day                                         |                                                          |
| Number of steps per day [steps/day] [Time Frame: 6 and 12 months] (Assessed by accelerometer)                    | Steps assessed by pedometer instead of accelerometer were analysed and displayed | steps/day (for overall steps and aerobic steps) | <10'000 steps/day (overall steps) <sup>i</sup>           |

Abbreviations: BMI, body mass index; CVD, cardiovascular disease; DXA, dual-energy x-ray absorptiometry; HbA1c, glycated haemoglobin; HDL, high-density lipoprotein cholesterol; HOMA-IR, homeostatic model assessment for insulin resistance; LDL, low-density lipoprotein cholesterol; MVPA, moderate-to-vigorous physical activities; n.a., not applicable; oGTT, oral glucose tolerance test; VO<sub>2</sub>max, peak oxygen uptake.

Note: an empty cell in the last three columns means that the outcome was not displayed in the respective format.

<sup>a</sup> At 3 months, only very few outcome assessments were performed in addition to the physical activity intervention counselling for participants of the intervention group. To reduce the burden of the study, some of the visits were dropped for the control participants who had a long way to travel to the clinic.

<sup>b</sup> Reference: *The IDF consensus worldwide definition of the metabolic syndrome*. Belgium: International Diabetes Federation, 2006

<sup>c</sup> Reference: 2. Classification and Diagnosis of Diabetes: Standards of Medical Care in Diabetes-2020. *Diabetes Care*. 2020;43(Suppl 1):S14-s31.

<sup>d</sup> Reference: Grundy SM, Stone NJ, Bailey AL, et al. 2018 AHA/ACC/AACVPR/AAPA/ABC/ACPM/ADA/AGS/APhA/ASPC/NLA/PCNA Guideline on the Management of Blood Cholesterol: A Report of the American College of Cardiology/American Heart Association Task Force on Clinical Practice Guidelines. *Circulation*. 2019;139(25):e1082-e1143.

<sup>e</sup> Reference: WHO. Body mass index - BMI. 2020; <https://www.euro.who.int/en/health-topics/disease-prevention/nutrition/a-healthy-lifestyle/body-mass-index-bmi>. Accessed 28.12.2020.

<sup>f</sup> Reference: Gallagher D, Heymsfield SB, Heo M, Jebb SA, Murgatroyd PR, Sakamoto Y. Healthy percentage body fat ranges: an approach for developing guidelines based on body mass index. *Am J Clin Nutr*. 2000;72(3):694-701.

<sup>g</sup> Reference: Van de Poppe DJ, Hulzebos E, Takken T. Reference values for maximum work rate in apparently healthy Dutch/Flemish adults: data from the LowLands fitness registry. *Acta Cardiol*. 2019;74(3):223-230.

<sup>h</sup> Reference: *Information sheet: global recommendations on physical activity for healthy 18 - 64 years old*. World Health Organization, 2011.

<sup>i</sup> Reference: Tudor-Locke C, Bassett DR, Jr., Rutherford WJ, et al. BMI-referenced cut points for pedometer-determined steps per day in adults. *Journal of physical activity & health*. 2008;5 Suppl 1(Suppl 1):S126-S139.



**eTable 2. Participants in the different groups of the per protocol analyses according to their compliance, stratified by originally randomized group**

|                                                                                        | Control group<br>(N = 75) | Intervention group<br>(N = 76) |
|----------------------------------------------------------------------------------------|---------------------------|--------------------------------|
| <b>Assumed compliance (PP1)</b>                                                        |                           |                                |
| Assumed control                                                                        | 42 (56%)                  | 34 (45%)                       |
| Assumed intervention                                                                   | 18 (24%)                  | 18 (24%)                       |
| Dropout <sup>a</sup>                                                                   | 6 (8%)                    | 13 (17%)                       |
| No valid CPET <sup>b</sup>                                                             | 9 (12%)                   | 11 (14%)                       |
| <b>Reported compliance, missing entries imputed with zero PA (PP2)</b>                 |                           |                                |
| Reported not compliant                                                                 | 22 (29%)                  | 28 (37%)                       |
| Reported compliant                                                                     | 47 (63%)                  | 35 (46%)                       |
| Dropout <sup>a</sup>                                                                   | 6 (8%)                    | 13 (17%)                       |
| <b>Reported compliance, missing entries imputed with average annual PA level (PP3)</b> |                           |                                |
| Reported not compliant                                                                 | 22 (29%)                  | 23 (30%)                       |
| Reported compliant                                                                     | 47 (63%)                  | 40 (53%)                       |
| Dropout <sup>a</sup>                                                                   | 6 (8%)                    | 13 (17%)                       |

Abbreviations: N, Number; PA, physical activity; PP1, per protocol allocation 1; PP2, per protocol allocation 2; PP3 per protocol allocation 3.

<sup>a</sup> Dropouts were set to missing in the mixed models to estimate the treatment effect of the assumed compliance; dropouts were treated as not compliant and therefore also excluded for the mixed models to estimate the treatment effects of the reported compliance.

<sup>b</sup> Only the following exercise tests were taken into consideration: either maximal or sub-maximal (sub-maximal at same level) effort at both time points, or improvement of performance despite less effort at T12.

**eTable 3. Description of all outcomes by study time point and per protocol 1 allocation, assumed intervention and control**

|                                                          | Assumed control group <sup>a</sup> |                      |                       | Assumed intervention group <sup>a</sup> |                      |                       |
|----------------------------------------------------------|------------------------------------|----------------------|-----------------------|-----------------------------------------|----------------------|-----------------------|
|                                                          | Baseline<br>(N = 76)               | 6 months<br>(N = 76) | 12 months<br>(N = 76) | Baseline<br>(N = 36)                    | 6 months<br>(N = 36) | 12 months<br>(N = 36) |
| <b>Continuous study outcomes</b>                         |                                    |                      |                       |                                         |                      |                       |
|                                                          | <b>Mean (SD)</b>                   | <b>Mean (SD)</b>     | <b>Mean (SD)</b>      | <b>Mean (SD)</b>                        | <b>Mean (SD)</b>     | <b>Mean (SD)</b>      |
| <b>CVD risk score (z-score), primary outcome</b>         | <b>0.4 (0.7)</b>                   | <b>0.4 (0.9)</b>     | <b>0.4 (0.9)</b>      | <b>0.5 (0.6)</b>                        | <b>0.2 (0.6)</b>     | <b>0.2 (0.6)</b>      |
| <b>N<sup>b</sup></b>                                     | <b>76</b>                          | <b>75</b>            | <b>76</b>             | <b>36</b>                               | <b>36</b>            | <b>36</b>             |
| <b>Waist circumference (cm)</b>                          | 81.2 (10.9)                        | 81.2 (10.5)          | 81.6 (11.5)           | 85.3 (9.3)                              | 84.9 (9.5)           | 85.3 (9.7)            |
| <b>N</b>                                                 | 75                                 | 75                   | 76                    | 36                                      | 35                   | 36                    |
| <b>Systolic BP (mmHg)</b>                                | 121.1 (15.0)                       | 117.1 (14.3)         | 115.3 (14.5)          | 121.0 (14.4)                            | 116.3 (15.2)         | 116.5 (12.1)          |
| <b>N</b>                                                 | 76                                 | 75                   | 76                    | 36                                      | 36                   | 36                    |
| <b>Diastolic BP (mmHg)</b>                               | 74.4 (10.2)                        | 71.9 (9.8)           | 72.7 (10.8)           | 75.3 (9.4)                              | 72.2 (10.0)          | 71.9 (8.0)            |
| <b>N</b>                                                 | 76                                 | 75                   | 76                    | 36                                      | 36                   | 36                    |
| <b>Fasting glucose (mmol/l)</b>                          | 4.6 (0.5)                          | 4.7 (0.5)            | 4.7 (0.5)             | 4.8 (0.4)                               | 4.7 (0.3)            | 4.8 (0.4)             |
| <b>N</b>                                                 | 73                                 | 66                   | 73                    | 36                                      | 34                   | 36                    |
| <b>HDL cholesterol (mmol/l)</b>                          | 1.5 (0.4)                          | 1.5 (0.4)            | 1.5 (0.4)             | 1.5 (0.3)                               | 1.5 (0.3)            | 1.5 (0.3)             |
| <b>N</b>                                                 | 76                                 | 71                   | 75                    | 36                                      | 36                   | 36                    |
| <b>Triglycerides (mmol/l)</b>                            | 1.3 (1.0)                          | 1.4 (1.6)            | 1.4 (1.7)             | 1.1 (0.6)                               | 1.1 (0.6)            | 1.0 (0.5)             |
| <b>N</b>                                                 | 76                                 | 71                   | 74                    | 36                                      | 36                   | 36                    |
| <b>Absolute peak power (Watt)</b>                        | 189.4 (47.9)                       | 188.6 (50.8)         | 181.9 (47.4)          | 196.0 (49.7)                            | 210.2 (55.3)         | 216.2 (55.8)          |
| <b>N</b>                                                 | 76                                 | 72                   | 76                    | 36                                      | 36                   | 36                    |
| <b>HbA1c (%)</b>                                         | 5.1 (0.3)                          | 5.2 (0.3)            | 5.2 (0.4)             | 5.1 (0.3)                               | 5.3 (0.5)            | 5.2 (0.4)             |
| <b>N</b>                                                 | 74                                 | 65                   | 74                    | 35                                      | 33                   | 34                    |
| <b>Glucose, 2h oGTT<sup>c</sup> (mmol/l)</b>             | 4.9 (1.7)                          | na                   | 4.7 (1.6)             | 4.9 (1.3)                               | na                   | 4.4 (1.0)             |
| <b>N</b>                                                 | 72                                 |                      | 71                    | 35                                      |                      | 36                    |
| <b>Glucose change, 0 to 2h oGTT<sup>c</sup> (mmol/l)</b> | 0.3 (1.6)                          | na                   | 0.1 (1.4)             | 0.2 (1.3)                               | na                   | -0.4 (0.9)            |
| <b>N</b>                                                 | 72                                 |                      | 70                    | 35                                      |                      | 36                    |
| <b>LDL cholesterol (mmol/l)</b>                          | 2.5 (0.8)                          | 2.6 (0.8)            | 2.5 (0.8)             | 2.7 (0.7)                               | 2.9 (0.7)            | 2.7 (0.6)             |
| <b>N</b>                                                 | 74                                 | 70                   | 73                    | 36                                      | 36                   | 36                    |
| <b>BMI (kg/m<sup>2</sup>)</b>                            | 23.6 (3.6)                         | 23.5 (3.5)           | 23.6 (3.7)            | 24.2 (3.6)                              | 24.0 (3.7)           | 24.2 (3.8)            |
| <b>N</b>                                                 | 76                                 | 75                   | 76                    | 36                                      | 36                   | 36                    |
| <b>Total body fat mass (kg)<sup>c</sup></b>              | 21.4 (6.3)                         | na                   | 21.5 (6.6)            | 22.8 (6.4)                              | na                   | 22.5 (7.1)            |
| <b>N</b>                                                 | 75                                 |                      | 75                    | 36                                      |                      | 36                    |
| <b>Total body fat proportion (%)<sup>c</sup></b>         | 30.9 (7.0)                         | na                   | 30.9 (7.0)            | 30.7 (6.6)                              | na                   | 30.0 (6.7)            |
| <b>N</b>                                                 | 75                                 |                      | 75                    | 36                                      |                      | 36                    |
| <b>% predicted abs. peak power</b>                       | 72.0 (16.4)                        | 71.7 (16.9)          | 69.2 (16.3)           | 71.2 (14.6)                             | 76.4 (16.1)          | 78.5 (15.8)           |
| <b>N</b>                                                 | 76                                 | 72                   | 76                    | 36                                      | 36                   | 36                    |
| <b>Relative peak power (Watt/kg)</b>                     | 2.8 (0.6)                          | 2.8 (0.6)            | 2.7 (0.6)             | 2.7 (0.6)                               | 2.9 (0.8)            | 3.0 (0.7)             |
| <b>N</b>                                                 | 76                                 | 72                   | 76                    | 36                                      | 36                   | 36                    |
| <b>% predicted rel. peak power</b>                       | 80.2 (17.8)                        | 80.1 (17.5)          | 77.2 (17.9)           | 76.7 (15.9)                             | 82.9 (19.0)          | 84.7 (18.0)           |
| <b>N</b>                                                 | 76                                 | 72                   | 76                    | 36                                      | 36                   | 36                    |
| <b>Grip strength dominant (kg)</b>                       | 41.9 (13.0)                        | 43.1 (13.3)          | 42.6 (12.7)           | 45.4 (11.1)                             | 45.6 (12.4)          | 47.1 (11.6)           |

|                                        |                 |                 |                 |                 |                 |                 |
|----------------------------------------|-----------------|-----------------|-----------------|-----------------|-----------------|-----------------|
| N                                      | 73              | 75              | 76              | 36              | 35              | 36              |
| <b>Grip strength non-dominant (kg)</b> | 38.4 (12.0)     | 39.7 (12.4)     | 39.7 (11.3)     | 43.0 (12.0)     | 43.2 (11.0)     | 43.8 (11.8)     |
| N                                      | 73              | 75              | 76              | 36              | 35              | 36              |
| <b>Repetitions 1-min STS</b>           | 50.3 (12.5)     | 55.8 (13.1)     | 57.5 (11.8)     | 51.6 (12.1)     | 55.7 (12.6)     | 58.3 (14.5)     |
| N                                      | 76              | 75              | 76              | 36              | 36              | 36              |
| <b>Overall counts per minute</b>       | 386.2 (127.2)   | 384.0 (119.1)   | 373.1 (124.8)   | 429.7 (130.1)   | 436.8 (154.3)   | 434.5 (124.9)   |
| N                                      | 76              | 74              | 75              | 36              | 36              | 36              |
| <b>Time in MVPA (min/day)</b>          | 38.2 (18.8)     | 37.2 (18.5)     | 36.6 (19.3)     | 47.5 (19.6)     | 45.0 (21.9)     | 45.6 (17.6)     |
| N                                      | 76              | 74              | 75              | 36              | 36              | 36              |
| <b>Time sedentary (min/day)</b>        | 542.0 (83.6)    | 521.1 (79.2)    | 535.7 (78.6)    | 523.6 (81.5)    | 522.4 (81.4)    | 523.6 (74.7)    |
| N                                      | 76              | 74              | 75              | 36              | 36              | 36              |
| <b>Average steps/day</b>               | 7367.3 (2527.5) | 7245.5 (2813.9) | 7041.3 (2978.4) | 7946.3 (2444.7) | 8229.5 (3126.7) | 7712.6 (2591.6) |
| N                                      | 75              | 74              | 74              | 36              | 35              | 36              |
| <b>Average aerobic steps/day</b>       | 1291.2 (1283.0) | 1397.0 (1509.6) | 1225.5 (1255.4) | 1507.5 (1228.0) | 1915.3 (2166.9) | 1476.7 (1260.4) |
| N                                      | 75              | 74              | 74              | 36              | 35              | 36              |

**Binary study outcomes<sup>d</sup>**

|                                                              | N (%)     | N (%)    | N (%)     | N (%)     | N (%)     | N (%)     |
|--------------------------------------------------------------|-----------|----------|-----------|-----------|-----------|-----------|
| <b>CVD risk</b>                                              |           |          |           |           |           |           |
| Normal CVD risk                                              | 60 (79%)  | 64 (85%) | 62 (82%)  | 29 (81%)  | 31 (86%)  | 31 (86%)  |
| Elevated CVD risk (z-score $\geq 1$ )                        | 16 (21%)  | 11 (15%) | 14 (18%)  | 7 (19%)   | 5 (14%)   | 5 (14%)   |
| <b>Waist circumference</b>                                   |           |          |           |           |           |           |
| Normal                                                       | 54 (72%)  | 55 (73%) | 57 (75%)  | 28 (78%)  | 26 (74%)  | 28 (78%)  |
| High (male $\geq 94$ cm, female $\geq 80$ cm)                | 21 (28%)  | 20 (27%) | 19 (25%)  | 8 (22%)   | 9 (26%)   | 8 (22%)   |
| <b>Blood pressure</b>                                        |           |          |           |           |           |           |
| Normotensive                                                 | 54 (71%)  | 57 (76%) | 65 (86%)  | 26 (72%)  | 29 (81%)  | 28 (78%)  |
| Hypertensive ( $\geq 130$ systolic / $\geq 85$ diastolic bp) | 22 (29%)  | 18 (24%) | 11 (14%)  | 10 (28%)  | 7 (19%)   | 8 (22%)   |
| <b>Fasting glucose</b>                                       |           |          |           |           |           |           |
| Normal                                                       | 72 (99%)  | 63 (94%) | 72 (96%)  | 35 (97%)  | 34 (100%) | 36 (100%) |
| Elevated ( $\geq 5.6$ mmol/L)                                | 1 (1%)    | 4 (6%)   | 3 (4%)    | 1 (3%)    | 0 (0%)    | 0 (0%)    |
| <b>HDL cholesterol</b>                                       |           |          |           |           |           |           |
| Normal                                                       | 62 (82%)  | 57 (80%) | 60 (80%)  | 32 (89%)  | 35 (97%)  | 34 (94%)  |
| Low (male $< 1.03$ mmol/L, female $< 1.30$ mmol/L)           | 14 (18%)  | 14 (20%) | 15 (20%)  | 4 (11%)   | 1 (3%)    | 2 (6%)    |
| <b>Triglycerides</b>                                         |           |          |           |           |           |           |
| Normal                                                       | 64 (84%)  | 56 (79%) | 62 (84%)  | 32 (89%)  | 31 (86%)  | 33 (92%)  |
| Elevated ( $\geq 1.7$ mmol/L)                                | 12 (16%)  | 15 (21%) | 12 (16%)  | 4 (11%)   | 5 (14%)   | 3 (8%)    |
| <b>HbA1c</b>                                                 |           |          |           |           |           |           |
| Normal                                                       | 71 (96%)  | 63 (97%) | 67 (91%)  | 35 (100%) | 30 (91%)  | 29 (85%)  |
| Elevated ( $\geq 5.7\%$ )                                    | 3 (4%)    | 2 (3%)   | 7 (9%)    | 0 (0%)    | 3 (9%)    | 5 (15%)   |
| <b>Insulin resistance (oGTT)<sup>c</sup></b>                 |           |          |           |           |           |           |
| No                                                           | 67 (93%)  | na       | 67 (94%)  | 34 (97%)  | na        | 36 (100%) |
| Yes (glucose $\geq 7.8$ mmol/L at 2h of oGTT)                | 5 (7%)    |          | 4 (6%)    | 1 (3%)    |           | 0 (0%)    |
| <b>LDL cholesterol</b>                                       |           |          |           |           |           |           |
| Normal                                                       | 74 (100%) | 68 (97%) | 73 (100%) | 36 (100%) | 36 (100%) | 36 (100%) |
| Elevated ( $\geq 4.9$ mmol/l)                                | 0 (0%)    | 2 (3%)   | 0 (0%)    | 0 (0%)    | 0 (0%)    | 0 (0%)    |
| <b>BMI</b>                                                   |           |          |           |           |           |           |

|                                              |          |          |          |          |          |          |
|----------------------------------------------|----------|----------|----------|----------|----------|----------|
| BMI <25kg/m <sup>2</sup>                     | 54 (71%) | 56 (75%) | 54 (71%) | 23 (64%) | 25 (69%) | 23 (64%) |
| BMI ≥25kg/m <sup>2</sup>                     | 22 (29%) | 19 (25%) | 22 (29%) | 13 (36%) | 11 (31%) | 13 (36%) |
| <b>Total body fat proportion<sup>c</sup></b> |          |          |          |          |          |          |
| Normal                                       | 62 (83%) | na       | 59 (79%) | 30 (83%) | na       | 33 (92%) |
| High (male ≥20%, female ≥33%)                | 13 (17%) |          | 16 (21%) | 6 (17%)  |          | 3 (8%)   |
| <b>Reaching CDC recommendations</b>          |          |          |          |          |          |          |
| <150 min MVPA/week                           | 12 (16%) | 16 (22%) | 16 (21%) | 2 (6%)   | 7 (19%)  | 4 (11%)  |
| ≥150 min MVPA/week                           | 64 (84%) | 58 (78%) | 59 (79%) | 34 (94%) | 29 (81%) | 32 (89%) |
| <b>Total steps/day</b>                       |          |          |          |          |          |          |
| <10'000 steps/day                            | 62 (83%) | 64 (86%) | 65 (88%) | 27 (75%) | 26 (74%) | 29 (81%) |
| ≥10'000 steps/day                            | 13 (17%) | 10 (14%) | 9 (12%)  | 9 (25%)  | 9 (26%)  | 7 (19%)  |

Abbreviations: abs., absolute; BP, blood pressure; CDC, Centers for Disease Control and Prevention; CVD, cardiovascular disease; HbA1c, glycosylated haemoglobin; HDL, high density lipoprotein; LDL, low density lipoprotein; MVPA, moderate-to-vigorous physical activities; N, number; na, not available; oGTT, oral glucose tolerance test; rel., relative; SD, standard deviation; STS, sit-to-stand.

Footnotes:

The grey shadow covers the variables that were part of the primary CVD risk score.

<sup>a</sup> Control group included participants with <5% increase in maximal power, intervention group included participants with ≥5% increase in maximal power, independent of original randomized allocation.

<sup>b</sup> Number of participants with information on the specific outcome at the specific time point (N non-missing).

<sup>c</sup> oGTT and body composition measured by dual-energy X-ray absorptiometry was not performed at time point 6 months.

<sup>d</sup> Column proportions were calculated based on available numbers for each variable.

**eTable 4. Description of all outcomes by study time point and per protocol 2 allocation, reported compliance** (missing entries imputed with zero physical activity)

|                                                          | Compliant control group <sup>a</sup> |                      |                       | Compliant intervention group <sup>a</sup> |                      |                       |
|----------------------------------------------------------|--------------------------------------|----------------------|-----------------------|-------------------------------------------|----------------------|-----------------------|
|                                                          | Baseline<br>(N = 47)                 | 6 months<br>(N = 47) | 12 months<br>(N = 47) | Baseline<br>(N = 35)                      | 6 months<br>(N = 35) | 12 months<br>(N = 35) |
| <b>Continuous study outcomes</b>                         |                                      |                      |                       |                                           |                      |                       |
|                                                          | <b>Mean (SD)</b>                     | <b>Mean (SD)</b>     | <b>Mean (SD)</b>      | <b>Mean (SD)</b>                          | <b>Mean (SD)</b>     | <b>Mean (SD)</b>      |
| <b>CVD risk score (z-score), primary outcome</b>         | <b>0.4 (0.6)</b>                     | <b>0.3 (0.8)</b>     | <b>0.4 (0.8)</b>      | <b>0.6 (0.7)</b>                          | <b>0.4 (0.8)</b>     | <b>0.3 (0.7)</b>      |
| <b>N<sup>b</sup></b>                                     | <b>47</b>                            | <b>46</b>            | <b>47</b>             | <b>35</b>                                 | <b>35</b>            | <b>35</b>             |
| <b>Waist circumference (cm)</b>                          | 81.0 (9.6)                           | 81.7 (9.2)           | 82.2 (10.8)           | 82.9 (10.4)                               | 81.9 (10.7)          | 82.3 (10.5)           |
| <b>N</b>                                                 | 46                                   | 46                   | 47                    | 35                                        | 34                   | 35                    |
| <b>Systolic BP (mmHg)</b>                                | 120.0 (14.4)                         | 114.7 (14.8)         | 113.7 (13.2)          | 121.8 (16.1)                              | 117.2 (16.9)         | 115.7 (16.5)          |
| <b>N</b>                                                 | 47                                   | 46                   | 47                    | 35                                        | 35                   | 35                    |
| <b>Diastolic BP (mmHg)</b>                               | 71.5 (9.9)                           | 68.5 (8.8)           | 69.5 (9.0)            | 77.2 (9.9)                                | 73.8 (11.4)          | 74.0 (11.8)           |
| <b>N</b>                                                 | 47                                   | 46                   | 47                    | 35                                        | 35                   | 35                    |
| <b>Fasting glucose (mmol/l)</b>                          | 4.6 (0.5)                            | 4.6 (0.6)            | 4.7 (0.5)             | 4.8 (0.5)                                 | 4.8 (0.8)            | 4.8 (1.1)             |
| <b>N</b>                                                 | 45                                   | 41                   | 45                    | 34                                        | 31                   | 34                    |
| <b>HDL cholesterol (mmol/l)</b>                          | 1.5 (0.3)                            | 1.5 (0.4)            | 1.5 (0.4)             | 1.4 (0.3)                                 | 1.5 (0.4)            | 1.5 (0.4)             |
| <b>N</b>                                                 | 47                                   | 45                   | 46                    | 35                                        | 34                   | 35                    |
| <b>Triglycerides (mmol/l)</b>                            | 1.1 (0.5)                            | 1.4 (1.6)            | 1.3 (1.7)             | 1.3 (1.1)                                 | 1.3 (1.4)            | 1.1 (0.7)             |
| <b>N</b>                                                 | 47                                   | 45                   | 45                    | 35                                        | 34                   | 34                    |
| <b>Absolute peak power (Watt)</b>                        | 184.7 (47.7)                         | 186.4 (56.3)         | 181.8 (50.6)          | 192.2 (56.0)                              | 199.6 (60.6)         | 204.4 (59.8)          |
| <b>N</b>                                                 | 47                                   | 45                   | 47                    | 35                                        | 34                   | 33                    |
| <b>HbA1c (%)</b>                                         | 5.2 (0.4)                            | 5.1 (0.3)            | 5.2 (0.4)             | 5.2 (0.5)                                 | 5.4 (0.7)            | 5.4 (0.7)             |
| <b>N</b>                                                 | 46                                   | 41                   | 46                    | 34                                        | 31                   | 35                    |
| <b>Glucose, 2h oGTT<sup>c</sup> (mmol/l)</b>             | 4.5 (1.5)                            | na                   | 4.4 (1.3)             | 5.2 (1.1)                                 | na                   | 4.6 (1.0)             |
| <b>N</b>                                                 | 44                                   |                      | 43                    | 32                                        |                      | 33                    |
| <b>Glucose change, 0 to 2h oGTT<sup>c</sup> (mmol/l)</b> | -0.1 (1.4)                           | na                   | -0.3 (1.3)            | 0.5 (1.1)                                 | na                   | -0.1 (1.0)            |
| <b>N</b>                                                 | 44                                   |                      | 43                    | 32                                        |                      | 33                    |
| <b>LDL cholesterol (mmol/l)</b>                          | 2.4 (0.7)                            | 2.6 (0.8)            | 2.4 (0.8)             | 2.7 (0.7)                                 | 2.8 (0.9)            | 2.7 (0.8)             |
| <b>N</b>                                                 | 47                                   | 45                   | 46                    | 34                                        | 33                   | 35                    |
| <b>BMI (kg/m<sup>2</sup>)</b>                            | 23.3 (3.4)                           | 23.4 (3.4)           | 23.5 (3.7)            | 24.3 (3.4)                                | 24.0 (3.3)           | 24.2 (3.4)            |
| <b>N</b>                                                 | 47                                   | 46                   | 47                    | 35                                        | 35                   | 35                    |
| <b>Total body fat mass (kg)<sup>c</sup></b>              | 22.1 (6.9)                           | na                   | 22.3 (7.4)            | 22.9 (6.1)                                | na                   | 22.5 (6.1)            |
| <b>N</b>                                                 | 47                                   |                      | 47                    | 35                                        |                      | 34                    |
| <b>Total body fat proportion (%)<sup>c</sup></b>         | 31.4 (7.4)                           | na                   | 31.3 (7.5)            | 31.9 (6.3)                                | na                   | 31.0 (6.4)            |
| <b>N</b>                                                 | 47                                   |                      | 47                    | 35                                        |                      | 34                    |
| <b>% predicted abs. peak power</b>                       | 71.4 (16.2)                          | 72.5 (17.7)          | 70.3 (17.0)           | 73.3 (16.1)                               | 75.6 (17.2)          | 77.0 (17.2)           |
| <b>N</b>                                                 | 47                                   | 45                   | 47                    | 35                                        | 34                   | 33                    |
| <b>Relative peak power (Watt/kg)</b>                     | 2.7 (0.6)                            | 2.7 (0.7)            | 2.7 (0.7)             | 2.7 (0.6)                                 | 2.9 (0.8)            | 2.9 (0.7)             |
| <b>N</b>                                                 | 47                                   | 45                   | 47                    | 35                                        | 34                   | 33                    |
| <b>% predicted rel. peak power</b>                       | 78.8 (20.2)                          | 79.4 (20.8)          | 77.4 (21.7)           | 78.6 (17.1)                               | 81.8 (20.1)          | 83.1 (16.9)           |
| <b>N</b>                                                 | 47                                   | 45                   | 47                    | 35                                        | 34                   | 33                    |
| <b>Grip strength dominant (kg)</b>                       | 41.0 (13.0)                          | 41.8 (13.5)          | 41.0 (12.6)           | 43.2 (12.6)                               | 44.5 (13.7)          | 45.4 (13.6)           |

|                                        |                 |                 |                 |                 |                 |                 |
|----------------------------------------|-----------------|-----------------|-----------------|-----------------|-----------------|-----------------|
| N                                      | 45              | 45              | 47              | 35              | 35              | 35              |
| <b>Grip strength non-dominant (kg)</b> | 37.6 (12.0)     | 38.1 (11.8)     | 39.0 (11.7)     | 39.7 (13.5)     | 40.7 (14.1)     | 40.9 (12.8)     |
| N                                      | 45              | 45              | 47              | 35              | 35              | 35              |
| <b>Repetitions 1-min STS</b>           | 48.9 (13.3)     | 52.0 (14.2)     | 53.2 (14.2)     | 50.4 (10.8)     | 55.9 (10.7)     | 59.3 (11.5)     |
| N                                      | 47              | 46              | 47              | 35              | 35              | 34              |
| <b>Overall counts per minute</b>       | 397.0 (118.1)   | 408.0 (129.3)   | 385.4 (128.4)   | 419.4 (157.7)   | 433.2 (139.0)   | 397.3 (126.8)   |
| N                                      | 46              | 45              | 45              | 35              | 34              | 35              |
| <b>Time in MVPA (min/day)</b>          | 40.3 (19.8)     | 41.5 (22.9)     | 38.8 (20.9)     | 41.4 (22.3)     | 42.7 (20.2)     | 38.1 (14.5)     |
| N                                      | 46              | 45              | 45              | 35              | 34              | 35              |
| <b>Time sedentary (min/day)</b>        | 529.3 (70.4)    | 518.4 (88.4)    | 521.6 (79.5)    | 520.2 (97.4)    | 493.0 (74.4)    | 521.4 (79.0)    |
| N                                      | 46              | 45              | 45              | 35              | 34              | 35              |
| <b>Average steps/day</b>               | 7582.5 (2915.0) | 7472.4 (3238.2) | 7177.2 (3346.4) | 7898.0 (2541.1) | 8382.4 (2660.8) | 7346.9 (2816.3) |
| N                                      | 45              | 46              | 47              | 34              | 33              | 34              |
| <b>Average aerobic steps/day</b>       | 1461.3 (1500.3) | 1427.1 (1860.9) | 1327.8 (1456.1) | 1453.7 (1359.7) | 2038.5 (1752.1) | 1391.4 (1172.9) |
| N                                      | 45              | 46              | 47              | 34              | 33              | 34              |

**Binary study outcomes<sup>d</sup>**

|                                                          | N (%)     | N (%)    | N (%)     | N (%)     | N (%)    | N (%)     |
|----------------------------------------------------------|-----------|----------|-----------|-----------|----------|-----------|
| <b>CVD risk</b>                                          |           |          |           |           |          |           |
| Normal CVD risk                                          | 38 (81%)  | 39 (85%) | 41 (87%)  | 26 (74%)  | 29 (83%) | 29 (83%)  |
| Elevated CVD risk (z-score $\geq 1$ )                    | 9 (19%)   | 7 (15%)  | 6 (13%)   | 9 (26%)   | 6 (17%)  | 6 (17%)   |
| <b>Waist circumference</b>                               |           |          |           |           |          |           |
| Normal                                                   | 35 (76%)  | 32 (70%) | 34 (72%)  | 24 (69%)  | 24 (71%) | 25 (71%)  |
| High (male $\geq 94$ cm, female $\geq 80$ cm)            | 11 (24%)  | 14 (30%) | 13 (28%)  | 11 (31%)  | 10 (29%) | 10 (29%)  |
| <b>Blood pressure</b>                                    |           |          |           |           |          |           |
| Normotensive                                             | 35 (74%)  | 39 (85%) | 40 (85%)  | 23 (66%)  | 24 (69%) | 29 (83%)  |
| Hypertensive ( $\geq 130$ systolic/ $\geq 85$ diastolic) | 12 (26%)  | 7 (15%)  | 7 (15%)   | 12 (34%)  | 11 (31%) | 6 (17%)   |
| <b>Fasting glucose</b>                                   |           |          |           |           |          |           |
| Normal                                                   | 44 (98%)  | 40 (95%) | 46 (98%)  | 32 (94%)  | 30 (97%) | 34 (97%)  |
| Elevated ( $\geq 5.6$ mol/L)                             | 1 (2%)    | 2 (5%)   | 1 (2%)    | 2 (6%)    | 1 (3%)   | 1 (3%)    |
| <b>HDL cholesterol</b>                                   |           |          |           |           |          |           |
| Normal                                                   | 40 (85%)  | 37 (82%) | 36 (78%)  | 29 (83%)  | 30 (88%) | 31 (89%)  |
| Low (male $< 1.03$ mmol/L, female $< 1.30$ mmol/L)       | 7 (15%)   | 8 (18%)  | 10 (22%)  | 6 (17%)   | 4 (12%)  | 4 (11%)   |
| <b>Triglycerides</b>                                     |           |          |           |           |          |           |
| Normal                                                   | 42 (89%)  | 36 (80%) | 40 (89%)  | 29 (83%)  | 29 (85%) | 30 (88%)  |
| Elevated ( $\geq 1.7$ mmol/L)                            | 5 (11%)   | 9 (20%)  | 5 (11%)   | 6 (17%)   | 5 (15%)  | 4 (12%)   |
| <b>HbA1c</b>                                             |           |          |           |           |          |           |
| Normal                                                   | 44 (96%)  | 40 (98%) | 42 (91%)  | 33 (97%)  | 29 (94%) | 29 (83%)  |
| Elevated ( $\geq 5.7\%$ )                                | 2 (4%)    | 1 (2%)   | 4 (9%)    | 1 (3%)    | 2 (6%)   | 6 (17%)   |
| <b>Insulin resistance (oGTT)<sup>e</sup></b>             |           |          |           |           |          |           |
| No                                                       | 42 (95%)  | na       | 42 (98%)  | 31 (97%)  | na       | 33 (100%) |
| Yes (glucose $\geq 7.8$ mmol/L at 2h of oGTT)            | 2 (5%)    |          | 1 (2%)    | 1 (3%)    |          | 0 (0%)    |
| <b>LDL cholesterol</b>                                   |           |          |           |           |          |           |
| Normal                                                   | 47 (100%) | 44 (98%) | 46 (100%) | 34 (100%) | 32 (97%) | 35 (100%) |
| Elevated ( $\geq 4.9$ mmol/l)                            | 0 (0%)    | 1 (2%)   | 0 (0%)    | 0 (0%)    | 1 (3%)   | 0 (0%)    |

|                                              |          |          |          |          |          |          |
|----------------------------------------------|----------|----------|----------|----------|----------|----------|
| <b>BMI</b>                                   |          |          |          |          |          |          |
| BMI <25kg/m <sup>2</sup>                     | 34 (72%) | 37 (80%) | 34 (72%) | 21 (60%) | 22 (63%) | 20 (57%) |
| BMI ≥25kg/m <sup>2</sup>                     | 13 (28%) | 9 (20%)  | 13 (28%) | 14 (40%) | 13 (37%) | 15 (43%) |
| <b>Total body fat proportion<sup>c</sup></b> |          |          |          |          |          |          |
| Normal                                       | 35 (74%) | na       | 35 (74%) | 32 (91%) | na       | 28 (82%) |
| High (male ≥20%, female ≥33%)                | 12 (26%) |          | 12 (26%) | 3 (9%)   |          | 6 (18%)  |
| <b>Reaching CDC recommendations</b>          |          |          |          |          |          |          |
| <150 min MVPA/week                           | 6 (13%)  | 9 (20%)  | 11 (24%) | 6 (17%)  | 6 (18%)  | 4 (11%)  |
| ≥150 min MVPA/week                           | 40 (87%) | 36 (80%) | 34 (76%) | 29 (83%) | 28 (82%) | 31 (89%) |
| <b>Total steps/day</b>                       |          |          |          |          |          |          |
| <10'000 steps/day                            | 35 (78%) | 38 (83%) | 41 (87%) | 27 (79%) | 23 (70%) | 28 (82%) |
| ≥10'000 steps/day                            | 10 (22%) | 8 (17%)  | 6 (13%)  | 7 (21%)  | 10 (30%) | 6 (18%)  |

Abbreviations: abs., absolute; BP, blood pressure; CDC, Centers for Disease Control and Prevention; CVD, cardiovascular disease; HbA1c, glycosylated haemoglobin; HDL, high density lipoprotein; LDL, low density lipoprotein; MVPA, moderate-to-vigorous physical activities; N, number; na, not available; oGTT, oral glucose tolerance test; rel., relative; SD, standard deviation; STS, sit-to-stand.

Footnotes:

The grey shadow covers the variables that were part of the primary CVD risk score.

<sup>a</sup> Compliant intervention participants included survivors who reported to have reached at least 60% of their personal physical activity goal, based on daily online diary entries (missing entries were imputed with 0 activity); compliant control participants included survivors who did not increase their physical activity level (≤30 increase in intense physical activities from baseline to 12 months post-randomization).

<sup>b</sup> Number of participants with information on the specific outcome at the specific time point (N non-missing).

<sup>c</sup> oGTT and body composition measured by dual-energy X-ray absorptiometry was not performed at time point 6 months.

<sup>d</sup> Column proportions were calculated based on available numbers for each variable.

**eTable 5: Description of all outcomes by study time point and per protocol 3 allocation, reported compliance** (missing entries imputed with mean annual physical activity level)

|                                                          | Compliant control group <sup>a</sup> |                      |                       | Compliant intervention group <sup>a</sup> |                      |                       |
|----------------------------------------------------------|--------------------------------------|----------------------|-----------------------|-------------------------------------------|----------------------|-----------------------|
|                                                          | Baseline<br>(N = 47)                 | 6 months<br>(N = 47) | 12 months<br>(N = 47) | Baseline<br>(N = 40)                      | 6 months<br>(N = 40) | 12 months<br>(N = 40) |
| <b>Continuous study outcomes</b>                         |                                      |                      |                       |                                           |                      |                       |
|                                                          | <b>Mean (SD)</b>                     | <b>Mean (SD)</b>     | <b>Mean (SD)</b>      | <b>Mean (SD)</b>                          | <b>Mean (SD)</b>     | <b>Mean (SD)</b>      |
| <b>CVD risk score (z-score), primary outcome</b>         | <b>0.4 (0.6)</b>                     | <b>0.3 (0.8)</b>     | <b>0.4 (0.8)</b>      | <b>0.7 (0.7)</b>                          | <b>0.5 (0.8)</b>     | <b>0.4 (0.8)</b>      |
| N <sup>b</sup>                                           | 47                                   | 46                   | 47                    | 40                                        | 40                   | 40                    |
| <b>Waist circumference (cm)</b>                          | 81.0 (9.6)                           | 81.7 (9.2)           | 82.2 (10.8)           | 84.1 (11.4)                               | 83.4 (11.6)          | 83.7 (11.7)           |
| N                                                        | 46                                   | 46                   | 47                    | 40                                        | 39                   | 40                    |
| <b>Systolic BP (mmHg)</b>                                | 120.0 (14.4)                         | 114.7 (14.8)         | 113.7 (13.2)          | 123.5 (16.0)                              | 118.8 (16.9)         | 115.8 (15.6)          |
| N                                                        | 47                                   | 46                   | 47                    | 40                                        | 40                   | 40                    |
| <b>Diastolic BP (mmHg)</b>                               | 71.5 (9.9)                           | 68.5 (8.8)           | 69.5 (9.0)            | 77.7 (9.6)                                | 74.5 (10.9)          | 74.1 (11.1)           |
| N                                                        | 47                                   | 46                   | 47                    | 40                                        | 40                   | 40                    |
| <b>Fasting glucose (mmol/l)</b>                          | 4.6 (0.5)                            | 4.6 (0.6)            | 4.7 (0.5)             | 4.8 (0.5)                                 | 4.8 (0.7)            | 4.9 (1.0)             |
| N                                                        | 45                                   | 41                   | 45                    | 39                                        | 35                   | 38                    |
| <b>HDL cholesterol (mmol/l)</b>                          | 1.5 (0.3)                            | 1.5 (0.4)            | 1.5 (0.4)             | 1.4 (0.3)                                 | 1.4 (0.4)            | 1.5 (0.4)             |
| N                                                        | 47                                   | 45                   | 46                    | 40                                        | 39                   | 39                    |
| <b>Triglycerides (mmol/l)</b>                            | 1.1 (0.5)                            | 1.4 (1.6)            | 1.3 (1.7)             | 1.4 (1.3)                                 | 1.4 (1.4)            | 1.3 (1.3)             |
| N                                                        | 47                                   | 45                   | 45                    | 40                                        | 39                   | 38                    |
| <b>Absolute peak power (Watt)</b>                        | 184.7 (47.7)                         | 186.4 (56.3)         | 181.8 (50.6)          | 190.5 (55.8)                              | 195.8 (60.4)         | 199.4 (58.9)          |
| N                                                        | 47                                   | 45                   | 47                    | 40                                        | 39                   | 38                    |
| <b>HbA1c (%)</b>                                         | 5.2 (0.4)                            | 5.1 (0.3)            | 5.2 (0.4)             | 5.2 (0.5)                                 | 5.4 (0.6)            | 5.4 (0.6)             |
| N                                                        | 46                                   | 41                   | 46                    | 39                                        | 35                   | 39                    |
| <b>Glucose, 2h oGTT<sup>c</sup> (mmol/l)</b>             | 4.5 (1.5)                            | na                   | 4.4 (1.3)             | 5.4 (1.4)                                 | na                   | 4.7 (1.2)             |
| N                                                        | 44                                   |                      | 43                    | 37                                        |                      | 37                    |
| <b>Glucose change, 0 to 2h oGTT<sup>c</sup> (mmol/l)</b> | -0.1 (1.4)                           | na                   | -0.3 (1.3)            | 0.6 (1.4)                                 | na                   | -0.0 (1.1)            |
| N                                                        | 44                                   |                      | 43                    | 37                                        |                      | 37                    |
| <b>LDL cholesterol (mmol/l)</b>                          | 2.4 (0.7)                            | 2.6 (0.8)            | 2.4 (0.8)             | 2.7 (0.8)                                 | 2.7 (0.9)            | 2.7 (0.8)             |
| N                                                        | 47                                   | 45                   | 46                    | 39                                        | 38                   | 38                    |
| <b>BMI (kg/m<sup>2</sup>)</b>                            | 23.3 (3.4)                           | 23.4 (3.4)           | 23.5 (3.7)            | 24.4 (3.7)                                | 24.1 (3.6)           | 24.2 (3.6)            |
| N                                                        | 47                                   | 46                   | 47                    | 40                                        | 40                   | 40                    |
| <b>Total body fat mass (kg)<sup>c</sup></b>              | 22.1 (6.9)                           | na                   | 22.3 (7.4)            | 22.6 (6.0)                                | na                   | 22.5 (6.4)            |
| N                                                        | 47                                   |                      | 47                    | 39                                        |                      | 39                    |
| <b>Total body fat proportion (%)<sup>c</sup></b>         | 31.4 (7.4)                           | na                   | 31.3 (7.5)            | 31.4 (6.2)                                | na                   | 30.7 (6.2)            |
| N                                                        | 47                                   |                      | 47                    | 39                                        |                      | 39                    |
| <b>% predicted abs. peak power</b>                       | 71.4 (16.2)                          | 72.5 (17.7)          | 70.3 (17.0)           | 71.3 (17.0)                               | 72.9 (18.4)          | 73.9 (18.4)           |
| N                                                        | 47                                   | 45                   | 47                    | 40                                        | 39                   | 38                    |
| <b>Relative peak power (Watt/kg)</b>                     | 2.7 (0.6)                            | 2.7 (0.7)            | 2.7 (0.7)             | 2.7 (0.6)                                 | 2.8 (0.8)            | 2.8 (0.7)             |
| N                                                        | 47                                   | 45                   | 47                    | 40                                        | 39                   | 38                    |
| <b>% predicted rel. peak power</b>                       | 78.8 (20.2)                          | 79.4 (20.8)          | 77.4 (21.7)           | 76.7 (17.3)                               | 79.2 (20.6)          | 80.1 (17.9)           |
| N                                                        | 47                                   | 45                   | 47                    | 40                                        | 39                   | 38                    |
| <b>Grip strength dominant (kg)</b>                       | 41.0 (13.0)                          | 41.8 (13.5)          | 41.0 (12.6)           | 44.4 (13.7)                               | 45.3 (13.8)          | 45.9 (13.6)           |
| N                                                        | 45                                   | 45                   | 47                    | 40                                        | 40                   | 40                    |
| <b>Grip strength non-dominant (kg)</b>                   | 37.6 (12.0)                          | 38.1 (11.8)          | 39.0 (11.7)           | 40.6 (13.3)                               | 41.6 (13.7)          | 41.6 (12.4)           |
| N                                                        | 45                                   | 45                   | 47                    | 40                                        | 40                   | 40                    |



|                                  |                    |                    |                    |                    |                    |                    |
|----------------------------------|--------------------|--------------------|--------------------|--------------------|--------------------|--------------------|
| <b>Repetitions 1-min STS</b>     | 48.9 (13.3)        | 52.0 (14.2)        | 53.2 (14.2)        | 48.9 (11.3)        | 54.1 (12.1)        | 57.2 (12.6)        |
| N                                | 47                 | 46                 | 47                 | 40                 | 40                 | 39                 |
| <b>Overall counts per minute</b> | 397.0 (118.1)      | 408.0 (129.3)      | 385.4 (128.4)      | 402.0 (158.3)      | 426.1 (146.0)      | 391.7 (141.6)      |
| N                                | 46                 | 45                 | 45                 | 39                 | 38                 | 40                 |
| <b>Time in MVPA (min/day)</b>    | 40.3 (19.8)        | 41.5 (22.9)        | 38.8 (20.9)        | 39.4 (22.0)        | 41.4 (20.1)        | 37.8 (16.8)        |
| N                                | 46                 | 45                 | 45                 | 39                 | 38                 | 40                 |
| <b>Time sedentary (min/day)</b>  | 529.3 (70.4)       | 518.4 (88.4)       | 521.6 (79.5)       | 528.4 (96.4)       | 499.2 (75.1)       | 527.1 (82.6)       |
| N                                | 46                 | 45                 | 45                 | 39                 | 38                 | 40                 |
| <b>Average steps/day</b>         | 7582.5<br>(2915.0) | 7472.4<br>(3238.2) | 7177.2<br>(3346.4) | 7576.2<br>(2641.7) | 8098.3<br>(2890.4) | 7117.1<br>(2876.4) |
| N                                | 45                 | 46                 | 47                 | 38                 | 38                 | 37                 |
| <b>Average aerobic steps/day</b> | 1461.3<br>(1500.3) | 1427.1<br>(1860.9) | 1327.8<br>(1456.1) | 1369.0<br>(1342.7) | 1904.7<br>(1704.1) | 1326.9<br>(1145.3) |
| N                                | 45                 | 46                 | 47                 | 38                 | 38                 | 37                 |

**Binary study outcomes<sup>d</sup>**

|                                                              | N (%)     | N (%)    | N (%)     | N (%)     | N (%)    | N (%)     |
|--------------------------------------------------------------|-----------|----------|-----------|-----------|----------|-----------|
| <b>CVD risk</b>                                              |           |          |           |           |          |           |
| Normal CVD risk                                              | 38 (81%)  | 39 (85%) | 41 (87%)  | 28 (70%)  | 32 (80%) | 32 (80%)  |
| Elevated CVD risk (z-score $\geq 1$ )                        | 9 (19%)   | 7 (15%)  | 6 (13%)   | 12 (30%)  | 8 (20%)  | 8 (20%)   |
| <b>Waist circumference</b>                                   |           |          |           |           |          |           |
| Normal                                                       | 35 (76%)  | 32 (70%) | 34 (72%)  | 27 (68%)  | 27 (69%) | 28 (70%)  |
| High (male $\geq 94$ cm, female $\geq 80$ )                  | 11 (24%)  | 14 (30%) | 13 (28%)  | 13 (33%)  | 12 (31%) | 12 (30%)  |
| <b>Blood pressure</b>                                        |           |          |           |           |          |           |
| Normotensive                                                 | 35 (74%)  | 39 (85%) | 40 (85%)  | 25 (63%)  | 27 (68%) | 34 (85%)  |
| Hypertensive ( $\geq 130$ systolic / $\geq 85$ diastolic bp) | 12 (26%)  | 7 (15%)  | 7 (15%)   | 15 (38%)  | 13 (33%) | 6 (15%)   |
| <b>Fasting glucose</b>                                       |           |          |           |           |          |           |
| Normal                                                       | 44 (98%)  | 40 (95%) | 46 (98%)  | 37 (95%)  | 34 (97%) | 37 (95%)  |
| Elevated ( $\geq 5.6$ mmol/L)                                | 1 (2%)    | 2 (5%)   | 1 (2%)    | 2 (5%)    | 1 (3%)   | 2 (5%)    |
| <b>HDL cholesterol</b>                                       |           |          |           |           |          |           |
| Normal                                                       | 38 (81%)  | 39 (85%) | 41 (87%)  | 28 (70%)  | 32 (80%) | 32 (80%)  |
| Low (male $< 1.03$ mmol/L, female $< 1.30$ mmol/L)           | 9 (19%)   | 7 (15%)  | 6 (13%)   | 12 (30%)  | 8 (20%)  | 8 (20%)   |
| <b>Triglycerides</b>                                         |           |          |           |           |          |           |
| Normal                                                       | 47 (100%) | 44 (98%) | 46 (100%) | 39 (100%) | 37 (97%) | 38 (100%) |
| Elevated ( $\geq 1.7$ mmol/L)                                | 0 (0%)    | 1 (2%)   | 0 (0%)    | 0 (0%)    | 1 (3%)   | 0 (0%)    |
| <b>HbA1c</b>                                                 |           |          |           |           |          |           |
| Normal                                                       | 44 (96%)  | 40 (98%) | 42 (91%)  | 38 (97%)  | 33 (94%) | 33 (85%)  |
| Elevated ( $\geq 5.7\%$ )                                    | 2 (4%)    | 1 (2%)   | 4 (9%)    | 1 (3%)    | 2 (6%)   | 6 (15%)   |
| <b>Insulin resistance (oGTT)<sup>c</sup></b>                 |           |          |           |           |          |           |
| No                                                           | 42 (95%)  | na       | 42 (98%)  | 35 (95%)  | na       | 36 (97%)  |
| Yes (glucose $\geq 7.8$ mmol/L at 2h of oGTT)                | 2 (5%)    |          | 1 (2%)    | 2 (5%)    |          | 1 (3%)    |
| <b>LDL cholesterol</b>                                       |           |          |           |           |          |           |
| Normal                                                       | 40 (85%)  | 37 (82%) | 36 (78%)  | 31 (78%)  | 33 (85%) | 33 (85%)  |
| Elevated ( $\geq 4.9$ mmol/l)                                | 7 (15%)   | 8 (18%)  | 10 (22%)  | 9 (23%)   | 6 (15%)  | 6 (15%)   |
| <b>BMI</b>                                                   |           |          |           |           |          |           |
| BMI $< 25$ kg/m <sup>2</sup>                                 | 42 (89%)  | 36 (80%) | 40 (89%)  | 31 (78%)  | 32 (82%) | 33 (87%)  |
| BMI $\geq 25$ kg/m <sup>2</sup>                              | 5 (11%)   | 9 (20%)  | 5 (11%)   | 9 (23%)   | 7 (18%)  | 5 (13%)   |
| <b>Total body fat proportion<sup>c</sup></b>                 |           |          |           |           |          |           |
| Normal                                                       | 34 (72%)  | 37 (80%) | 34 (72%)  | 23 (57%)  | 25 (63%) | 23 (57%)  |
| High (male $\geq 20\%$ , female $\geq 33\%$ )                | 13 (28%)  | 9 (20%)  | 13 (28%)  | 17 (43%)  | 15 (38%) | 17 (43%)  |
| <b>Reaching CDC recommendations</b>                          |           |          |           |           |          |           |

|                        |          |          |          |          |          |          |
|------------------------|----------|----------|----------|----------|----------|----------|
| <150 min MVPA/week     | 6 (13%)  | 9 (20%)  | 11 (24%) | 7 (18%)  | 8 (21%)  | 6 (15%)  |
| ≥150 min MVPA/week     | 40 (87%) | 36 (80%) | 34 (76%) | 32 (82%) | 30 (79%) | 34 (85%) |
| <b>Total steps/day</b> |          |          |          |          |          |          |
| <10'000 steps/day      | 35 (78%) | 38 (83%) | 41 (87%) | 31 (82%) | 27 (71%) | 31 (84%) |
| ≥10'000 steps/day      | 10 (22%) | 8 (17%)  | 6 (13%)  | 7 (18%)  | 11 (29%) | 6 (16%)  |

Abbreviations: abs., absolute; BP, blood pressure; CDC, Centers for Disease Control and Prevention; CVD, cardiovascular disease; HbA1c, glycosylated haemoglobin; HDL, high density lipoprotein; LDL, low density lipoprotein; MVPA, moderate-to-vigorous physical activities; N, number; na, not available; oGTT, oral glucose tolerance test; rel., relative; SD, standard deviation; STS, sit-to-stand.

Footnotes:

The grey shadow covers the variables that were part of the primary CVD risk score.

<sup>a</sup> Compliant intervention participants included survivors who reported to have reached at least 60% of their personal physical activity goal, based on daily online diary entries (missing entries were imputed with the annual mean minutes of daily physical activity); compliant control participants included survivors who did not increase their physical activity level (≤30 increase in intense physical activities from baseline to 12 months post-randomization).

<sup>b</sup> Number of participants with information on the specific outcome at the specific time point (N non-missing).

<sup>c</sup> oGTT and body composition measured by dual-energy X-ray absorptiometry was not performed at time point 6 months.

<sup>d</sup> Column proportions were calculated based on available numbers for each variable.

**eTable 6. Intervention effect (marginal mean difference from randomization) of all continuous secondary outcomes at each study time point with intention-to-treat allocation (ITT, as randomized); from mixed effects generalized linear model**

|                                    | Time point 6 months |               |  |               |               |  |                                   |               |              | Time point 12 months |               |  |               |               |  |                                   |               |              |
|------------------------------------|---------------------|---------------|--|---------------|---------------|--|-----------------------------------|---------------|--------------|----------------------|---------------|--|---------------|---------------|--|-----------------------------------|---------------|--------------|
|                                    | Intervention group  |               |  | Control group |               |  | Difference Intervention - Control |               |              | Intervention group   |               |  | Control group |               |  | Difference Intervention - Control |               |              |
|                                    | $\beta$             | 95% CI        |  | $\beta$       | 95% CI        |  | $\beta$                           | 95% CI        | p-value      | $\beta$              | 95% CI        |  | $\beta$       | 95% CI        |  | $\beta$                           | 95% CI        | p-value      |
| Waist circumference (cm)           | -0.70               | -1.42 - 0.01  |  | 1.04          | 0.35 - 1.74   |  | -1.75                             | -2.74 - -0.75 | <b>0.001</b> | -0.28                | -1.00 - 0.44  |  | 0.92          | 0.22 - 1.62   |  | -1.20                             | -2.21 - -0.20 | <b>0.019</b> |
| Systolic blood pressure (mmHg)     | -4.70               | -6.48 - -2.92 |  | -4.81         | -6.54 - -3.08 |  | 0.11                              | -2.37 - 2.59  | 0.931        | -6.49                | -8.31 - -4.67 |  | -5.59         | -7.32 - -3.86 |  | -0.90                             | -3.42 - 1.61  | 0.482        |
| Diastolic blood pressure (mmHg)    | -2.69               | -3.94 - -1.44 |  | -3.44         | -4.66 - -2.22 |  | 0.75                              | -1.01 - 2.51  | 0.404        | -3.39                | -4.67 - -2.11 |  | -2.22         | -3.43 - -1.00 |  | -1.17                             | -2.96 - 0.61  | 0.196        |
| Fasting glucose (mmol/l)           | 0.07                | -0.02 - 0.17  |  | 0.07          | -0.02 - 0.16  |  | 0.00                              | -0.13 - 0.13  | 0.982        | 0.09                 | 0.00 - 0.18   |  | 0.08          | -0.01 - 0.17  |  | 0.01                              | -0.12 - 0.14  | 0.867        |
| HDL cholesterol (mmol/l)           | 0.05                | 0.01 - 0.09   |  | 0.04          | 0.00 - 0.07   |  | 0.01                              | -0.04 - 0.07  | 0.638        | 0.07                 | 0.03 - 0.11   |  | 0.03          | -0.01 - 0.07  |  | 0.04                              | -0.02 - 0.09  | 0.162        |
| Triglycerides (mmol/l)             | -0.05               | -0.24 - 0.15  |  | 0.16          | -0.02 - 0.34  |  | -0.21                             | -0.47 - 0.06  | 0.131        | -0.07                | -0.26 - 0.13  |  | 0.15          | -0.04 - 0.33  |  | -0.21                             | -0.48 - 0.06  | 0.119        |
| Absolute peak power (Watt)         | 3.84                | 0.24 - 7.43   |  | 0.74          | -2.73 - 4.22  |  | 3.09                              | -1.90 - 8.09  | 0.225        | 0.72                 | -2.96 - 4.40  |  | -1.82         | -5.27 - 1.62  |  | 2.54                              | -2.50 - 7.58  | 0.324        |
| HbA1c (%)                          | 0.15                | 0.07 - 0.22   |  | 0.00          | -0.07 - 0.07  |  | 0.15                              | 0.05 - 0.25   | <b>0.005</b> | 0.17                 | 0.09 - 0.24   |  | 0.04          | -0.03 - 0.11  |  | 0.12                              | 0.02 - 0.22   | <b>0.016</b> |
| Glucose, 2h oGTT (mmol/l)          | na                  |               |  | na            |               |  | na                                |               |              | -0.18                | -0.43 - 0.06  |  | -0.39         | -0.62 - -0.15 |  | 0.20                              | -0.14 - 0.55  | 0.248        |
| Glucose change, 0-2h oGTT (mmol/l) | na                  |               |  | na            |               |  | na                                |               |              | -0.23                | -0.47 - 0.02  |  | -0.46         | -0.69 - -0.22 |  | 0.23                              | -0.11 - 0.57  | 0.182        |
| LDL cholesterol (mmol/l)           | 0.10                | 0.01 - 0.18   |  | 0.15          | 0.07 - 0.24   |  | -0.06                             | -0.18 - 0.06  | 0.351        | 0.01                 | -0.08 - 0.11  |  | 0.04          | -0.05 - 0.12  |  | -0.02                             | -0.15 - 0.10  | 0.732        |
| BMI (kg/m <sup>2</sup> )           | -0.24               | -0.43 - -0.05 |  | 0.07          | -0.11 - 0.25  |  | -0.31                             | -0.57 - -0.04 | <b>0.022</b> | -0.15                | -0.34 - 0.04  |  | 0.15          | -0.03 - 0.33  |  | -0.30                             | -0.56 - -0.03 | <b>0.027</b> |
| Total body fat mass (kg)           | na                  |               |  | na            |               |  | na                                |               |              | -0.30                | -0.69 - 0.08  |  | 0.31          | -0.05 - 0.67  |  | -0.61                             | -1.14 - -0.08 | <b>0.023</b> |
| Total body fat proportion (%)      | na                  |               |  | na            |               |  | na                                |               |              | -0.51                | -0.83 - -0.19 |  | 0.07          | -0.23 - 0.37  |  | -0.58                             | -1.02 - -0.14 | <b>0.010</b> |

|                                  |        |         |       |       |         |       |       |         |      |                  |        |         |       |       |         |       |        |         |       |              |
|----------------------------------|--------|---------|-------|-------|---------|-------|-------|---------|------|------------------|--------|---------|-------|-------|---------|-------|--------|---------|-------|--------------|
| % predicted abs. peak power      | 1.41   | 0.09-   | 2.72  | 0.10  | -1.17-  | 1.36  | 1.31  | -0.52-  | 3.14 | 0.159            | 0.28   | -1.07-  | 1.62  | -0.77 | -2.03-  | 0.49  | 1.04   | -0.80-  | 2.89  | 0.266        |
| Relative peak power (Watt/kg)    | 0.08   | 0.03-   | 0.14  | -0.01 | -0.06-  | 0.04  | 0.09  | 0.02-   | 0.16 | <b>0.017</b>     | 0.02   | -0.03-  | 0.08  | -0.03 | -0.08-  | 0.02  | 0.06   | -0.02-  | 0.13  | 0.145        |
| % predicted rel. peak power      | 2.40   | 0.90-   | 3.89  | -0.29 | -1.74-  | 1.15  | 2.69  | 0.61-   | 4.77 | <b>0.011</b>     | 0.69   | -0.84-  | 2.22  | -0.96 | -2.39-  | 0.47  | 1.65   | -0.44-  | 3.74  | 0.122        |
| Grip strength dominant (kg)      | 0.56   | -0.25-  | 1.36  | 0.86  | 0.06-   | 1.65  | -0.30 | -1.43-  | 0.84 | 0.605            | 1.54   | 0.71-   | 2.36  | 0.39  | -0.40-  | 1.18  | 1.15   | 0.00-   | 2.29  | <b>0.049</b> |
| Grip strength non-dominant (kg)  | 1.15   | 0.37-   | 1.93  | 0.42  | -0.35-  | 1.18  | 0.74  | -0.36-  | 1.83 | 0.187            | 1.22   | 0.42-   | 2.02  | 1.34  | 0.58-   | 2.10  | -0.12  | -1.22-  | 0.98  | 0.832        |
| Repetitions 1-min STS, 2nd trial | 6.26   | 5.04-   | 7.47  | 3.17  | 1.99-   | 4.35  | 3.09  | 1.39-   | 4.79 | <b>&lt;0.001</b> | 8.13   | 6.88-   | 9.38  | 5.12  | 3.92-   | 6.31  | 3.01   | 1.28-   | 4.74  | <b>0.001</b> |
| Overall counts per minute        | -2.98  | -22.45- | 16.48 | -6.63 | -25.37- | 12.11 | 3.64  | -23.4-  | 30.7 | 0.792            | -23.98 | -43.61- | -4.34 | -3.73 | -22.61- | 15.15 | -20.25 | -47.51- | 7.01  | 0.145        |
| Time in MVPA (min/day)           | -2.67  | -5.95-  | 0.61  | -1.20 | -4.35-  | 1.96  | -1.47 | -6.03-  | 3.08 | 0.526            | -4.20  | -7.51-  | -0.90 | -0.62 | -3.80-  | 2.56  | -3.59  | -8.18-  | 1.01  | 0.126        |
| Time sedentary (min/day)         | -16.16 | -29.34- | -2.99 | -7.40 | -20.09- | 5.29  | -8.76 | -27.06- | 9.53 | 0.348            | 5.19   | -8.09-  | 18.47 | -6.48 | -19.26- | 6.30  | 11.67  | -6.77-  | 30.10 | 0.215        |
| Average steps/day                | 114    | -377-   | 605   | -165  | -635-   | 305   | 279   | -401-   | 959  | 0.421            | -579   | -1082-  | -76   | -88   | -558-   | 382   | -491   | -1180-  | 198   | 0.163        |
| Average aerobic steps/day        | 251    | -18.7-  | 521   | -14.1 | -272-   | 244   | 265   | -108-   | 639  | 0.164            | -208   | -484-   | 69    | -38   | -296-   | 219   | -169   | -547-   | 209   | 0.381        |

Footnote: The estimates represent the marginal mean changes of all continuous secondary outcomes, from baseline to 6 and 12 months post-randomization for the intervention and control group. The grey shadow covers the variables that were part of the primary CVD risk score. Estimates from mixed effects generalized linear models adjusted for sex, main diagnostic group and baseline value of the respective outcome. Treatment allocation was based on intention-to-treat (as randomized). All randomized participants (N=151) with valid baseline measurement of the respective outcome were included in the models. See also Figure 3A and eFigure 2A for a graphical display of the same results.

Abbreviations: abs., absolute; BMI, body mass index; CI, confidence interval; HbA1c, glycosylated haemoglobin; HDL, high density lipoprotein; LDL, low density lipoprotein; MVPA, moderate-to-vigorous physical activities; na, not available; oGTT, oral glucose tolerance test; rel., relative; STS, sit-to-stand;  $\beta$ , marginal estimate.

**eTable 7. Intervention effect (marginal mean difference from randomization) of all secondary continuous outcomes at each study time point with per protocol allocation 1; from mixed effects generalized linear model**

|                                    | Time point 6 months |               |  |               |               |  |                                   |               |                  | Time point 12 months |               |  |               |                |  |                                   |               |                  |
|------------------------------------|---------------------|---------------|--|---------------|---------------|--|-----------------------------------|---------------|------------------|----------------------|---------------|--|---------------|----------------|--|-----------------------------------|---------------|------------------|
|                                    | Intervention group  |               |  | Control group |               |  | Difference Intervention - Control |               |                  | Intervention group   |               |  | Control group |                |  | Difference Intervention - Control |               |                  |
|                                    | $\beta$             | 95% CI        |  | $\beta$       | 95% CI        |  | $\beta$                           | 95% CI        | p-value          | $\beta$              | 95% CI        |  | $\beta$       | 95% CI         |  | $\beta$                           | 95% CI        | p-value          |
| Waist circumference (cm)           | -0.45               | -1.48 - 0.57  |  | 0.09          | -0.61 - 0.80  |  | -0.55                             | -1.79 - 0.70  | 0.390            | 0.10                 | -0.91 - 1.11  |  | 0.33          | -0.37 - 1.03   |  | -0.23                             | -1.47 - 1.00  | 0.710            |
| Systolic blood pressure (mmHg)     | -4.92               | -7.39 - -2.45 |  | -3.98         | -5.69 - -2.26 |  | -0.95                             | -3.96 - 2.07  | 0.538            | -4.74                | -7.21 - -2.27 |  | -5.76         | -7.46 - -4.06  |  | 1.02                              | -1.98 - 4.02  | 0.506            |
| Diastolic blood pressure (mmHg)    | -3.16               | -4.88 - -1.45 |  | -2.58         | -3.76 - -1.39 |  | -0.59                             | -2.68 - 1.51  | 0.583            | -3.45                | -5.17 - -1.74 |  | -1.75         | -2.93 - -0.57  |  | -1.70                             | -3.79 - 0.38  | 0.110            |
| Fasting glucose (mmol/l)           | 0.03                | -0.07 - 0.13  |  | 0.08          | 0.01 - 0.15   |  | -0.05                             | -0.17 - 0.07  | 0.390            | 0.03                 | -0.06 - 0.13  |  | 0.08          | 0.01 - 0.15    |  | -0.04                             | -0.16 - 0.07  | 0.459            |
| HDL cholesterol (mmol/l)           | 0.07                | 0.02 - 0.12   |  | 0.04          | 0.00 - 0.07   |  | 0.03                              | -0.03 - 0.10  | 0.274            | 0.07                 | 0.02 - 0.12   |  | 0.02          | -0.01 - 0.06   |  | 0.05                              | -0.01 - 0.11  | 0.106            |
| Triglycerides (mmol/l)             | -0.08               | -0.36 - 0.20  |  | 0.17          | -0.02 - 0.37  |  | -0.26                             | -0.60 - 0.09  | 0.142            | -0.13                | -0.40 - 0.15  |  | 0.15          | -0.05 - 0.34   |  | -0.27                             | -0.61 - 0.07  | 0.115            |
| Absolute peak power (Watt)         | 14.11               | 10.33 - 17.89 |  | -1.02         | -3.69 - 1.65  |  | 15.12                             | 10.49 - 19.76 | <b>&lt;0.001</b> | 20.14                | 16.36 - 23.92 |  | -7.40         | -10.00 - -4.80 |  | 27.54                             | 22.95 - 32.13 | <b>&lt;0.001</b> |
| HbA1c (%)                          | 0.16                | 0.06 - 0.27   |  | 0.04          | -0.03 - 0.11  |  | 0.12                              | 0.00 - 0.25   | 0.054            | 0.12                 | 0.02 - 0.22   |  | 0.11          | 0.04 - 0.17    |  | 0.01                              | -0.11 - 0.13  | 0.891            |
| Glucose, 2h oGTT (mmol/l)          | na                  |               |  | na            |               |  | na                                |               |                  | -0.57                | -0.89 - -0.24 |  | -0.18         | -0.42 - 0.05   |  | -0.38                             | -0.78 - 0.02  | 0.060            |
| Glucose change, 0-2h oGTT (mmol/l) | na                  |               |  | na            |               |  | na                                |               |                  | -0.62                | -0.94 - -0.30 |  | -0.26         | -0.50 - -0.03  |  | -0.36                             | -0.75 - 0.04  | 0.079            |
| LDL cholesterol (mmol/l)           | 0.15                | 0.04 - 0.27   |  | 0.11          | 0.03 - 0.19   |  | 0.05                              | -0.10 - 0.19  | 0.533            | -0.02                | -0.13 - 0.10  |  | 0.01          | -0.07 - 0.09   |  | -0.02                             | -0.17 - 0.12  | 0.734            |
| BMI (kg/m <sup>2</sup> )           | -0.18               | -0.43 - 0.07  |  | -0.08         | -0.25 - 0.10  |  | -0.11                             | -0.41 - 0.20  | 0.496            | 0.03                 | -0.22 - 0.28  |  | -0.03         | -0.20 - 0.15   |  | 0.06                              | -0.25 - 0.36  | 0.715            |
| Total body fat mass (kg)           | na                  |               |  | na            |               |  | na                                |               |                  | -0.30                | -0.82 - 0.23  |  | 0.08          | -0.28 - 0.45   |  | -0.38                             | -1.02 - 0.27  | 0.251            |
| Total body fat proportion (%)      | na                  |               |  | na            |               |  | na                                |               |                  | -0.70                | -1.14 - -0.27 |  | -0.02         | -0.32 - 0.29   |  | -0.69                             | -1.22 - -0.15 | <b>0.012</b>     |
| % predicted abs. peak power        | 5.19                | 3.84 - 6.55   |  | -0.52         | -1.47 - 0.44  |  | 5.71                              | 4.05 - 7.37   | <b>&lt;0.001</b> | 7.26                 | 5.90 - 8.62   |  | -2.81         | -3.74 - -1.88  |  | 10.07                             | 8.42 - 11.72  | <b>&lt;0.001</b> |

|                                  |       |               |                       |       |              |                  |       |                |        |               |       |                |                  |
|----------------------------------|-------|---------------|-----------------------|-------|--------------|------------------|-------|----------------|--------|---------------|-------|----------------|------------------|
| Relative peak power (Watt/kg)    | 0.21  | 0.15 - 0.27   | -0.02 -0.06 - 0.03    | 0.23  | 0.16- 0.30   | <b>&lt;0.001</b> | 0.28  | 0.22 - 0.34    | -0.11  | -0.15 - -0.07 | 0.39  | 0.32 - 0.46    | <b>&lt;0.001</b> |
| % predicted rel. peak power      | 6.04  | 4.38 - 7.71   | -0.53 -1.71 - 0.64    | 6.58  | 4.53- 8.62   | <b>&lt;0.001</b> | 7.88  | 6.21 - 9.54    | -3.04  | -4.19 - -1.90 | 10.92 | 8.89 - 12.95   | <b>&lt;0.001</b> |
| Grip strength dominant (kg)      | 0.53  | -0.58 - 1.65  | 1.35 0.57 - 2.12      | -0.81 | -2.18- 0.55  | 0.243            | 1.75  | 0.65 - 2.86    | 0.99   | 0.21 - 1.76   | 0.77  | -0.58 - 2.12   | 0.265            |
| Grip strength non-dominant (kg)  | 0.63  | -0.47 - 1.73  | 1.28 0.52 - 2.05      | -0.65 | -1.99- 0.69  | 0.340            | 1.07  | -0.01 - 2.15   | 1.46   | 0.70 - 2.21   | -0.39 | -1.71 - 0.94   | 0.568            |
| Repetitions 1-min STS, 2nd trial | 4.16  | 2.50 - 5.82   | 5.44 4.29 - 6.59      | -1.28 | -3.30- 0.74  | 0.215            | 6.75  | 5.09 - 8.40    | 7.23   | 6.09 - 8.37   | -0.49 | -2.50 - 1.53   | 0.635            |
| Overall counts per minute        | 13.82 | -11.70 -39.35 | -5.69 -23.44 -12.07   | 19.51 | -11.69-50.70 | 0.220            | 11.51 | -14.02 - 37.03 | -16.44 | -34.07 - 1.20 | 27.94 | -3.18 - 59.06  | 0.078            |
| Time in MVPA (min/day)           | -0.81 | -5.06 - 3.43  | -1.80 -4.74 - 1.15    | 0.98  | -4.21- 6.18  | 0.710            | -0.14 | -4.39 - 4.10   | -2.35  | -5.28 - 0.58  | 2.20  | -2.98 - 7.39   | 0.404            |
| Time sedentary (min/day)         | -5.04 | -22.95 -12.87 | -19.12 -31.59 - -6.66 | 14.08 | -7.79-35.96  | 0.207            | -3.84 | -21.75 - 14.08 | -4.43  | -16.82 - 7.95 | 0.60  | -21.23 - 22.42 | 0.957            |
| Average steps/day                | 392   | -276 - 1059   | -196 -658 - 265       | 588   | -226- 1402   | 0.157            | -135  | -794 - 525     | -370   | -831 - 91     | 235   | -571 - 1042    | 0.567            |
| Average aerobic steps/day        | 461   | 88 - 835      | 49 -209 - 308         | 412   | -43- 867     | 0.076            | 25    | -344 - 393     | -91    | -349 - 219    | 116   | -335 - 567     | 0.615            |

Footnote: The estimates represent marginal mean changes of all continuous secondary outcomes from baseline to 6 and 12 months post-randomization for the intervention and control group. The grey shadow covers the variables that were part of the primary CVD risk score. Estimates from mixed effects generalized linear models adjusted for sex, main diagnostic group and baseline value of the respective outcome. Treatment allocation was based on assumed compliance (per protocol 1 analysis): the control group included participants who increased their maximal power by <5%; the intervention group included participants who increased their maximal power by ≥5%. All assumed compliant participants (N=112) with valid baseline measurement of the respective outcome were included in the models. See also Figure 3B and eFigure 2B for a graphical display of the same results.

Abbreviations: abs., absolute; BMI, body mass index; CI, confidence interval; HbA1c, glycosylated haemoglobin; HDL, high density lipoprotein; LDL, low density lipoprotein; MVPA, moderate-to-vigorous physical activities; na, not available; oGTT, oral glucose tolerance test; rel., relative; STS, sit-to-stand; β, marginal estimate.

**eTable 8. Intervention effect (marginal mean difference from randomization) of all secondary continuous outcomes at each study time point with per protocol allocation 2; from mixed effects generalized linear model**

|                                       | Time point 6 months |               |  |               |               |  |                                   |               |              | Time point 12 months |               |  |               |               |  |                                   |               |              |
|---------------------------------------|---------------------|---------------|--|---------------|---------------|--|-----------------------------------|---------------|--------------|----------------------|---------------|--|---------------|---------------|--|-----------------------------------|---------------|--------------|
|                                       | Intervention group  |               |  | Control group |               |  | Difference Intervention - Control |               |              | Intervention group   |               |  | Control group |               |  | Difference Intervention - Control |               |              |
|                                       | $\beta$             | 95% CI        |  | $\beta$       | 95% CI        |  | $\beta$                           | 95% CI        | p-value      | $\beta$              | 95% CI        |  | $\beta$       | 95% CI        |  | $\beta$                           | 95% CI        | p-value      |
| Waist circumference (cm)              | -1.11               | -2.10 - -0.11 |  | 1.06          | 0.19 - 1.93   |  | -2.17                             | -3.50 - -0.84 | <b>0.001</b> | -0.61                | -1.59 - 0.37  |  | 1.19          | 0.34 - 2.05   |  | -1.80                             | -3.12 - -0.49 | <b>0.007</b> |
| Systolic blood pressure (mmHg)        | -4.46               | -6.98 - -1.93 |  | -5.49         | -7.69 - -3.29 |  | 1.04                              | -2.32 - 4.39  | 0.545        | -5.96                | -8.48 - -3.43 |  | -6.45         | -8.62 - -4.27 |  | 0.49                              | -2.85 - 3.83  | 0.773        |
| Diastolic blood pressure (mmHg)       | -3.00               | -4.81 - -1.19 |  | -3.29         | -4.86 - -1.72 |  | 0.30                              | -2.13 - 2.72  | 0.811        | -2.87                | -4.68 - -1.06 |  | -2.33         | -3.89 - -0.78 |  | -0.54                             | -2.95 - 1.88  | 0.664        |
| Fasting glucose (mmol/l)              | 0.04                | -0.10 - 0.18  |  | 0.00          | -0.13 - 0.12  |  | 0.04                              | -0.14 - 0.23  | 0.636        | 0.05                 | -0.08 - 0.18  |  | 0.04          | -0.08 - 0.16  |  | 0.01                              | -0.17 - 0.19  | 0.916        |
| HDL cholesterol (mmol/l)              | 0.08                | 0.03 - 0.13   |  | 0.03          | -0.01 - 0.07  |  | 0.05                              | -0.02 - 0.12  | 0.131        | 0.11                 | 0.06 - 0.16   |  | 0.01          | -0.03 - 0.05  |  | 0.10                              | 0.03 - 0.17   | <b>0.003</b> |
| Triglycerides (mmol/l)                | 0.04                | -0.28 - 0.35  |  | 0.28          | 0.00 - 0.55   |  | -0.24                             | -0.66 - 0.18  | 0.264        | -0.23                | -0.54 - 0.08  |  | 0.20          | -0.07 - 0.47  |  | -0.43                             | -0.85 - -0.01 | <b>0.045</b> |
| Absolute peak power (Watt)            | 5.18                | 0.06 - 10.30  |  | 2.24          | -2.21 - 6.68  |  | 2.94                              | -3.86 - 9.74  | 0.396        | 7.12                 | 1.92 - 12.32  |  | -2.82         | -7.17 - 1.54  |  | 9.93                              | 3.12 - 16.75  | <b>0.004</b> |
| HbA1c (%)                             | 0.19                | 0.08 - 0.30   |  | -0.05         | -0.15 - 0.04  |  | 0.24                              | 0.09 - 0.39   | <b>0.001</b> | 0.20                 | 0.09 - 0.30   |  | 0.03          | -0.07 - 0.12  |  | 0.17                              | 0.04 - 0.31   | <b>0.014</b> |
| Glucose, 2h oGTT (mmol/l)             | na                  |               |  | na            |               |  | na                                |               |              | -0.59                | -0.91 - -0.27 |  | -0.30         | -0.58 - -0.02 |  | -0.29                             | -0.72 - 0.13  | 0.179        |
| Glucose change, 0 to 2h oGTT (mmol/l) | na                  |               |  | na            |               |  | na                                |               |              | -0.56                | -0.87 - -0.24 |  | -0.31         | -0.59 - -0.04 |  | -0.24                             | -0.67 - 0.19  | 0.268        |
| LDL cholesterol (mmol/l)              | 0.13                | 0.01 - 0.25   |  | 0.16          | 0.05 - 0.26   |  | -0.02                             | -0.18 - 0.13  | 0.761        | 0.05                 | -0.07 - 0.17  |  | 0.00          | -0.10 - 0.10  |  | 0.05                              | -0.11 - 0.21  | 0.542        |
| BMI (kg/m <sup>2</sup> )              | -0.30               | -0.54 - -0.06 |  | 0.14          | -0.07 - 0.35  |  | -0.44                             | -0.76 - -0.12 | <b>0.008</b> | -0.15                | -0.39 - 0.09  |  | 0.11          | -0.10 - 0.32  |  | -0.26                             | -0.58 - 0.06  | 0.107        |
| Total body fat mass (kg)              | na                  |               |  | na            |               |  | na                                |               |              | -0.44                | -0.93 - 0.04  |  | 0.19          | -0.22 - 0.61  |  | -0.64                             | -1.28 - 0.01  | <b>0.053</b> |
| Total body fat proportion (%)         | na                  |               |  | na            |               |  | na                                |               |              | -0.74                | -1.19 - -0.30 |  | -0.07         | -0.45 - 0.31  |  | -0.67                             | -1.26 - -0.09 | <b>0.025</b> |
| % predicted abs. peak power           | 1.78                | -0.08 - 3.65  |  | 0.54          | -1.08 - 2.16  |  | 1.24                              | -1.23 - 3.72  | 0.324        | 2.56                 | 0.67 - 4.45   |  | -1.15         | -2.73 - 0.44  |  | 3.71                              | 1.23 - 6.19   | <b>0.003</b> |
| Relative peak power (Watt/kg)         | 0.11                | 0.03 - 0.19   |  | 0.00          | -0.07 - 0.07  |  | 0.11                              | 0.00 - 0.22   | <b>0.041</b> | 0.11                 | 0.02 - 0.19   |  | -0.05         | -0.12 - 0.02  |  | 0.15                              | 0.05 - 0.26   | <b>0.005</b> |
| % predicted rel. peak power           | 3.26                | 1.02 - 5.50   |  | -0.07         | -2.01 - 1.88  |  | 3.32                              | 0.35 - 6.30   | <b>0.028</b> | 2.94                 | 0.67 - 5.21   |  | -1.36         | -3.27 - 0.55  |  | 4.30                              | 1.32 - 7.28   | <b>0.005</b> |
| Grip strength dominant (kg)           | 1.42                | 0.38 - 2.46   |  | 1.15          | 0.21 - 2.08   |  | 0.27                              | -1.13 - 1.67  | 0.707        | 2.31                 | 1.27 - 3.35   |  | 0.09          | -0.83 - 1.00  |  | 2.23                              | 0.84 - 3.61   | <b>0.002</b> |

|                                  |        |                |                     |                      |              |        |                |        |                |       |                |                  |
|----------------------------------|--------|----------------|---------------------|----------------------|--------------|--------|----------------|--------|----------------|-------|----------------|------------------|
| Grip strength non-dominant (kg)  | 1.19   | 0.11 - 2.26    | 0.63 -0.34 - 1.60   | 0.55 -0.90 - 2.01    | 0.455        | 1.32   | 0.24 - 2.40    | 1.46   | 0.51 - 2.41    | -0.14 | -1.58 - 1.30   | 0.849            |
| Repetitions 1-min STS, 2nd trial | 5.65   | 3.98 - 7.33    | 2.92 1.46 - 4.38    | 2.74 0.51 - 4.96     | <b>0.016</b> | 8.85   | 7.15 - 10.55   | 4.27   | 2.82 - 5.71    | 4.58  | 2.35 - 6.82    | <b>&lt;0.001</b> |
| Overall counts per minute        | 11.47  | -16.09 - 39.03 | 5.31 -18.88 - 29.50 | 6.16 -30.60 - 42.93  | 0.743        | -19.83 | -46.98 - 7.31  | -12.59 | -36.78 - 11.61 | -7.25 | -43.70 - 29.21 | 0.697            |
| Time in MVPA (min/day)           | 0.63   | -4.05 - 5.32   | 0.49 -3.63 - 4.61   | 0.15 -6.11 - 6.40    | 0.964        | -3.32  | -7.94 - 1.30   | -0.89  | -5.01 - 3.23   | -2.43 | -8.63 - 3.77   | 0.443            |
| Time sedentary (min/day)         | -27.32 | -44.92 - -9.71 | -6.07 -21.53 - 9.39 | -21.25 -44.73 - 2.24 | 0.076        | -0.31  | -17.66 - 17.04 | -5.79  | -21.25 - 9.68  | 5.48  | -17.82 - 28.78 | 0.645            |
| Average steps/day                | 470    | -246 - 1185    | -32 -651 - 588      | 501 -448 - 1451      | 0.301        | -517   | -1234 - 200    | -268   | -881 - 346     | -249  | -1197 - 698    | 0.606            |
| Average aerobic steps/day        | 548    | 167 - 929      | -13 -343 - 317      | 561 56 - 1067        | <b>0.029</b> | -80    | -462 - 301     | -87    | -414 - 239     | 7     | -497 - 511     | 0.979            |

Footnote: Estimates represent the marginal mean changes of all continuous secondary outcomes from baseline to 6 and 12 months post-randomization for the intervention and control group. The grey shadow covers the variables that were part of the primary CVD risk score. Estimates from mixed effects generalized linear models adjusted for sex, main diagnostic group and baseline value of the respective outcome. The models included compliant control and intervention participants only. Intervention compliance was based on daily reporting of physical activities. Missing days were imputed with 0 activity. Control compliance was based on an interview at the beginning and end of the intervention. All reported compliant participants (N=82) with valid baseline measurement of the respective outcome were included in the models. See also Figure 3C and eFigure 2C for a graphical display of the same results.

Abbreviations: abs., absolute; BMI, body mass index; CI, confidence interval; HbA1c, glycosylated haemoglobin; HDL, high density lipoprotein; LDL, low density lipoprotein; MVPA, moderate-to-vigorous physical activities; na, not available; oGTT, oral glucose tolerance test; rel., relative; STS, sit-to-stand;  $\beta$ , marginal estimate.



**eTable 9. Intervention effect (marginal mean difference from randomization) of all secondary continuous outcomes at each study time point with per protocol allocation 3; from mixed effects generalized linear model**

|                                       | Time point 6 months |        |       |               |        |       |                                   |        |       | Time point 12 months |         |        |               |         |        |                                   |         |        |        |              |
|---------------------------------------|---------------------|--------|-------|---------------|--------|-------|-----------------------------------|--------|-------|----------------------|---------|--------|---------------|---------|--------|-----------------------------------|---------|--------|--------|--------------|
|                                       | Intervention group  |        |       | Control group |        |       | Difference Intervention - Control |        |       | Intervention group   |         |        | Control group |         |        | Difference Intervention - Control |         |        |        |              |
|                                       | $\beta$             | 95% CI |       | $\beta$       | 95% CI |       | $\beta$                           | 95% CI |       | p-value              | $\beta$ | 95% CI |               | $\beta$ | 95% CI |                                   | $\beta$ | 95% CI |        | p-value      |
| Waist circumference (cm)              | -0.81               | -1.78  | 0.15  | 1.06          | 0.17   | 1.96  | -1.88                             | -3.21  | -0.55 | <b>0.006</b>         | -0.40   | -1.36  | 0.55          | 1.19    | 0.31   | 2.08                              | -1.60   | -2.91  | -0.29  | <b>0.017</b> |
| Systolic blood pressure (mmHg)        | -4.45               | -6.84  | -2.06 | -5.58         | -7.80  | -3.35 | 1.13                              | -2.15  | 4.40  | 0.500                | -7.51   | -9.90  | -5.12         | -6.53   | -8.73  | -4.33                             | -0.98   | -4.24  | 2.28   | 0.554        |
| Diastolic blood pressure (mmHg)       | -2.79               | -4.46  | -1.12 | -3.34         | -4.89  | -1.79 | 0.55                              | -1.76  | 2.86  | 0.642                | -3.24   | -4.91  | -1.57         | -2.38   | -3.92  | -0.84                             | -0.86   | -3.16  | 1.44   | 0.463        |
| Fasting glucose (mmol/l)              | 0.01                | -0.12  | 0.14  | 0.00          | -0.12  | 0.12  | 0.02                              | -0.16  | 0.19  | 0.855                | 0.06    | -0.07  | 0.18          | 0.04    | -0.08  | 0.15                              | 0.02    | -0.16  | 0.19   | 0.858        |
| HDL cholesterol (mmol/l)              | 0.09                | 0.04   | 0.13  | 0.03          | -0.01  | 0.07  | 0.06                              | -0.01  | 0.12  | 0.095                | 0.11    | 0.06   | 0.15          | 0.01    | -0.03  | 0.05                              | 0.10    | 0.03   | 0.16   | <b>0.004</b> |
| Triglycerides (mmol/l)                | -0.05               | -0.35  | 0.24  | 0.28          | 0.01   | 0.56  | -0.34                             | -0.74  | 0.07  | 0.105                | -0.16   | -0.45  | 0.14          | 0.20    | -0.07  | 0.48                              | -0.36   | -0.77  | 0.05   | 0.086        |
| Absolute peak power (Watt)            | 3.39                | -1.49  | 8.27  | 2.31          | -2.24  | 6.85  | 1.09                              | -5.60  | 7.77  | 0.750                | 4.46    | -0.49  | 9.41          | -2.72   | -7.18  | 1.73                              | 7.18    | 0.50   | -13.87 | <b>0.035</b> |
| HbA1c (%)                             | 0.19                | 0.09   | 0.30  | -0.05         | -0.14  | 0.04  | 0.24                              | 0.11   | 0.38  | <b>0.001</b>         | 0.21    | 0.11   | 0.31          | 0.03    | -0.06  | 0.12                              | 0.18    | 0.05   | 0.31   | <b>0.006</b> |
| Glucose, 2h oGTT (mmol/l)             | na                  |        |       | na            |        |       | na                                |        |       |                      | -0.61   | -0.91  | -0.31         | -0.31   | -0.59  | -0.03                             | -0.30   | -0.71  | 0.11   | 0.152        |
| Glucose change, 0 to 2h oGTT (mmol/l) | na                  |        |       | na            |        |       | na                                |        |       |                      | -0.58   | -0.88  | -0.28         | -0.33   | -0.60  | -0.05                             | -0.25   | -0.66  | 0.16   | 0.227        |
| LDL cholesterol (mmol/l)              | 0.06                | -0.05  | 0.18  | 0.15          | 0.05   | 0.26  | -0.09                             | -0.25  | 0.07  | 0.256                | 0.02    | -0.09  | 0.14          | 0.00    | -0.10  | 0.10                              | 0.02    | -0.13  | 0.18   | 0.757        |
| BMI (kg/m <sup>2</sup> )              | -0.31               | -0.54  | -0.08 | 0.14          | -0.08  | 0.35  | -0.44                             | -0.76  | -0.12 | <b>0.006</b>         | -0.19   | -0.42  | 0.04          | 0.11    | -0.11  | 0.32                              | -0.29   | -0.61  | 0.02   | 0.068        |
| Total body fat mass (kg)              | na                  |        |       | na            |        |       | na                                |        |       |                      | -0.43   | -0.90  | 0.05          | 0.19    | -0.23  | 0.62                              | -0.62   | -1.26  | 0.02   | 0.058        |
| Total body fat proportion (%)         | na                  |        |       | na            |        |       | na                                |        |       |                      | -0.66   | -1.08  | -0.23         | -0.06   | -0.45  | 0.32                              | -0.59   | -1.17  | -0.02  | <b>0.042</b> |
| % predicted abs. peak power           | 1.18                | -0.58  | 2.94  | 0.57          | -1.07  | 2.21  | 0.61                              | -1.80  | 3.02  | 0.622                | 1.67    | -0.11  | 3.46          | -1.11   | -2.71  | 0.50                              | 2.78    | 0.37   | 5.19   | <b>0.024</b> |

|                                                |        |                |                     |                     |              |        |                |                       |         |                |                  |
|------------------------------------------------|--------|----------------|---------------------|---------------------|--------------|--------|----------------|-----------------------|---------|----------------|------------------|
| Relative peak power (Watt/kg) % predicted rel. | 0.09   | 0.01 - 0.16    | 0.00 -0.07 - 0.07   | 0.09 -0.02 - 0.19   | 0.104        | 0.08   | 0.00 - 0.15    | -0.05 -0.11 - 0.02    | 0.12    | 0.02 - 0.23    | <b>0.018</b>     |
| peak power                                     | 2.59   | 0.49 - 4.69    | -0.03 -1.98 - 1.92  | 2.62 -0.26 - 5.49   | 0.075        | 2.20   | 0.08 - 4.33    | -1.31 -3.23 - 0.60    | 3.52    | 0.64 - 6.39    | <b>0.016</b>     |
| Grip strength dominant (kg)                    | 0.98   | -0.04 - 2.00   | 1.16 0.18 - 2.15    | -0.19 -1.61 - 1.24  | 0.799        | 1.64   | 0.61 - 2.66    | 0.11 -0.85 - 1.07     | 1.53    | 0.12 - 2.94    | <b>0.034</b>     |
| Grip strength non-dominant (kg)                | 1.07   | 0.07 - 2.07    | 0.65 -0.31 - 1.61   | 0.42 -0.98 - 1.81   | 0.558        | 1.13   | 0.13 - 2.13    | 1.48 0.54 - 2.42      | -0.35   | -1.73 - 1.03   | 0.620            |
| Repetitions 1-min STS, 2nd trial               | 5.39   | 3.83 - 6.95    | 2.90 1.44 - 4.35    | 2.50 0.35 - 4.64    | <b>0.022</b> | 8.36   | 6.78 - 9.94    | 4.25 2.81 - 5.69      | 4.11    | 1.96 - 6.25    | <b>&lt;0.001</b> |
| Overall counts per minute                      | 8.99   | -16.98 - 34.96 | 7.02 -16.78 - 30.81 | 1.98 33.34 - 37.29  | 0.913        | -20.35 | -45.63 - 4.94  | -10.83 -34.63 - 12.96 | -9.51   | -44.32 - 25.29 | 0.592            |
| Time in MVPA (min/day)                         | 0.17   | -4.25 - 4.58   | 0.69 -3.36 - 4.73   | -0.52 -6.52 - 5.48  | 0.865        | -3.37  | -7.67 - 0.93   | -0.68 -4.73 - 3.36    | -2.68   | -8.60 - 3.23   | 0.374            |
| Time sedentary (min/day)                       | -25.60 | -42.32 - -8.88 | -6.89 22.21 - 8.43  | -18.71 41.45 - 4.03 | 0.107        | 1.68   | -14.60 - 17.96 | -6.68 -22.00 - 8.65   | 8.36    | -14.06 - 30.77 | 0.465            |
| Average steps/day                              | 384    | -283 - 1050    | -1 -612 - 611       | 384 -523 - 1292     | 0.407        | -523   | -1199 - 154    | -236 -841 - 369       | -286.81 | -1198 - 625    | 0.537            |
| Average aerobic steps/day                      | 482    | 128 - 836      | -11 -336 - 314      | 493 11 - 975        | <b>0.045</b> | -95    | -455 - 265     | -85 -406 - 237        | -10.36  | -494 - 474     | 0.967            |

Footnote: The estimates represent the marginal mean changes of all continuous secondary outcomes from baseline to 6 and 12 months post-randomization for the intervention and control group. The grey shadow covers the variables that were part of the primary CVD risk score. Estimates from mixed effects generalized linear models adjusted for sex, main diagnostic group and baseline value of the respective outcome. The models included compliant control and intervention participants only. Intervention compliance was based on daily reporting of physical activities. Missing days were imputed with the yearly mean of physical activities per day. Control compliance was based on an interview at the beginning and end of the intervention. All reported compliant participants (N=87) with valid baseline measurement of the respective outcome were included in the models. See also Figure 3D and eFigure 2D for a graphical display of the same results.

Abbreviations: abs., absolute; BMI, body mass index; CI, confidence interval; HbA1c, glycosylated haemoglobin; HDL, high density lipoprotein; LDL, low density lipoprotein; MVPA, moderate-to-vigorous physical activities; na, not available; oGTT, oral glucose tolerance test; rel., relative; STS, sit-to-stand;  $\beta$ , marginal estimate.

**eTable 10: Description of all outcomes by study time point and physical activity dose group**

|                                                  | <b>&lt;50% of activity goal reached<sup>a</sup></b> |                       | <b>50%-99% of activity goal reached<sup>a</sup></b> |                       | <b>≥100% of activity goal reached<sup>a</sup></b> |                       |
|--------------------------------------------------|-----------------------------------------------------|-----------------------|-----------------------------------------------------|-----------------------|---------------------------------------------------|-----------------------|
|                                                  | Baseline<br>(N = 67)                                | 12 months<br>(N = 67) | Baseline<br>(N = 26)                                | 12 months<br>(N = 26) | Baseline<br>(N = 17)                              | 12 months<br>(N = 17) |
| <b><i>Continuous study outcomes</i></b>          |                                                     |                       |                                                     |                       |                                                   |                       |
|                                                  | <b>Mean (SD)</b>                                    | <b>Mean (SD)</b>      | <b>Mean (SD)</b>                                    | <b>Mean (SD)</b>      | <b>Mean (SD)</b>                                  | <b>Mean (SD)</b>      |
| <b>CVD risk score (z-score), primary outcome</b> | <b>0.5 (0.7)</b>                                    | <b>0.5 (0.9)</b>      | <b>0.5 (0.7)</b>                                    | <b>0.2 (0.7)</b>      | <b>0.6 (0.6)</b>                                  | <b>0.3 (0.7)</b>      |
| <b>N<sup>b</sup></b>                             | <b>67</b>                                           | <b>67</b>             | <b>26</b>                                           | <b>26</b>             | <b>17</b>                                         | <b>17</b>             |
| <b>Waist circumference (cm)</b>                  | 83.0 (10.5)                                         | 83.8 (11.3)           | 80.6 (12.3)                                         | 79.8 (13.3)           | 85.9 (10.0)                                       | 85.6 (9.2)            |
| N                                                | 66                                                  | 67                    | 26                                                  | 26                    | 17                                                | 17                    |
| <b>Systolic BP (mmHg)</b>                        | 122.1 (14.3)                                        | 115.2 (12.4)          | 122.2 (15.0)                                        | 116.2 (12.4)          | 122.4 (17.7)                                      | 115.9 (20.7)          |
| N                                                | 67                                                  | 67                    | 26                                                  | 26                    | 17                                                | 17                    |
| <b>Diastolic BP (mmHg)</b>                       | 74.0 (10.3)                                         | 71.4 (9.3)            | 77.3 (9.1)                                          | 72.8 (8.1)            | 76.7 (11.1)                                       | 74.1 (15.4)           |
| N                                                | 67                                                  | 67                    | 26                                                  | 26                    | 17                                                | 17                    |
| <b>Fasting glucose (mmol/l)</b>                  | 4.6 (0.4)                                           | 4.7 (0.5)             | 4.7 (0.5)                                           | 4.7 (0.6)             | 4.8 (0.5)                                         | 5.1 (1.4)             |
| N                                                | 64                                                  | 64                    | 25                                                  | 26                    | 17                                                | 16                    |
| <b>HDL cholesterol (mmol/l)</b>                  | 1.5 (0.4)                                           | 1.5 (0.4)             | 1.4 (0.4)                                           | 1.5 (0.4)             | 1.5 (0.3)                                         | 1.6 (0.4)             |
| N                                                | 67                                                  | 65                    | 26                                                  | 26                    | 17                                                | 17                    |
| <b>Triglycerides (mmol/l)</b>                    | 1.3 (0.8)                                           | 1.5 (1.7)             | 1.4 (1.2)                                           | 1.1 (0.8)             | 1.1 (0.7)                                         | 1.0 (0.5)             |
| N                                                | 66                                                  | 64                    | 26                                                  | 26                    | 17                                                | 16                    |
| <b>Absolute peak power (Watt)</b>                | 185.3 (46.0)                                        | 180.2 (47.0)          | 185.7 (55.8)                                        | 199.8 (62.1)          | 196.9 (54.7)                                      | 207.3 (50.3)          |
| N                                                | 67                                                  | 67                    | 26                                                  | 24                    | 17                                                | 16                    |
| <b>HbA1c (%)</b>                                 | 5.2 (0.3)                                           | 5.2 (0.4)             | 5.1 (0.4)                                           | 5.3 (0.4)             | 5.3 (0.6)                                         | 5.5 (0.8)             |
| N                                                | 66                                                  | 65                    | 24                                                  | 25                    | 17                                                | 17                    |
| <b>Glucose, 2h oGTT (mmol/l)</b>                 | 4.7 (1.5)                                           | 4.7 (1.6)             | 5.2 (1.8)                                           | 4.8 (1.3)             | 5.2 (1.0)                                         | 4.5 (1.0)             |
| N                                                | 63                                                  | 61                    | 25                                                  | 26                    | 15                                                | 15                    |
| <b>Glucose change, 0 to 2h oGTT (mmol/l)</b>     | 0.0 (1.4)                                           | 0.0 (1.4)             | 0.4 (1.6)                                           | 0.1 (1.2)             | 0.5 (1.0)                                         | -0.3 (1.0)            |
| N                                                | 63                                                  | 61                    | 25                                                  | 26                    | 15                                                | 15                    |
| <b>LDL cholesterol (mmol/l)</b>                  | 2.4 (0.7)                                           | 2.4 (0.8)             | 2.5 (0.7)                                           | 2.5 (0.7)             | 2.9 (0.8)                                         | 3.0 (0.7)             |
| N                                                | 67                                                  | 63                    | 25                                                  | 26                    | 17                                                | 17                    |
| <b>BMI (kg/m<sup>2</sup>)</b>                    | 23.9 (3.7)                                          | 24.0 (4.1)            | 23.4 (4.2)                                          | 23.1 (4.1)            | 25.3 (2.9)                                        | 25.3 (2.7)            |
| N                                                | 67                                                  | 67                    | 26                                                  | 26                    | 17                                                | 17                    |
| <b>Total body fat mass (kg)</b>                  | 22.8 (6.9)                                          | 22.8 (7.5)            | 20.0 (5.2)                                          | 20.1 (6.4)            | 24.8 (6.8)                                        | 24.3 (6.4)            |
| N                                                | 67                                                  | 66                    | 25                                                  | 25                    | 17                                                | 17                    |
| <b>Total body fat proportion (%)</b>             | 31.5 (7.0)                                          | 31.4 (7.1)            | 29.9 (5.3)                                          | 29.2 (5.5)            | 33.1 (7.3)                                        | 32.5 (7.2)            |
| N                                                | 67                                                  | 66                    | 25                                                  | 25                    | 17                                                | 17                    |
| <b>% predicted abs. peak power</b>               | 70.4 (15.7)                                         | 68.6 (16.6)           | 69.8 (17.6)                                         | 73.5 (17.8)           | 76.4 (15.3)                                       | 80.3 (15.5)           |
| N                                                | 67                                                  | 67                    | 26                                                  | 24                    | 17                                                | 16                    |
| <b>Relative peak power (Watt/kg)</b>             | 2.7 (0.6)                                           | 2.6 (0.6)             | 2.8 (0.7)                                           | 3.0 (0.8)             | 2.7 (0.6)                                         | 2.9 (0.5)             |
| N                                                | 67                                                  | 67                    | 26                                                  | 24                    | 17                                                | 16                    |
| <b>% predicted rel. peak power</b>               | 76.2 (18.1)                                         | 74.3 (19.4)           | 80.0 (17.5)                                         | 83.8 (19.4)           | 78.8 (18.3)                                       | 83.2 (14.7)           |
| N                                                | 67                                                  | 67                    | 26                                                  | 24                    | 17                                                | 16                    |

|                                        |                 |                 |                 |                 |                 |                 |
|----------------------------------------|-----------------|-----------------|-----------------|-----------------|-----------------|-----------------|
| <b>Grip strength dominant (kg)</b>     | 42.4 (13.0)     | 42.2 (11.9)     | 41.1 (11.1)     | 43.0 (12.2)     | 45.5 (13.7)     | 48.0 (15.1)     |
| N                                      | 64              | 67              | 26              | 26              | 17              | 17              |
| <b>Grip strength non-dominant (kg)</b> | 38.3 (11.9)     | 39.5 (11.1)     | 38.9 (12.5)     | 40.4 (12.3)     | 40.1 (15.1)     | 41.5 (14.6)     |
| N                                      | 64              | 67              | 26              | 26              | 17              | 17              |
| <b>Repetitions 1-min STS</b>           | 49.5 (12.7)     | 54.0 (13.7)     | 48.6 (10.4)     | 60.1 (12.0)     | 50.5 (12.7)     | 57.8 (11.7)     |
| N                                      | 67              | 67              | 26              | 25              | 17              | 17              |
| <b>Overall counts per minute</b>       | 384.5 (119.4)   | 377.1 (130.0)   | 384.8 (133.5)   | 357.6 (119.4)   | 439.2 (171.2)   | 422.2 (125.2)   |
| N                                      | 65              | 64              | 26              | 26              | 17              | 17              |
| <b>Time in MVPA (min/day)</b>          | 38.9 (19.3)     | 37.1 (21.0)     | 40.0 (18.6)     | 35.0 (13.5)     | 41.3 (24.3)     | 41.0 (15.6)     |
| N                                      | 65              | 64              | 26              | 26              | 17              | 17              |
| <b>Time sedentary (min/day)</b>        | 536.6 (78.3)    | 531.5 (81.4)    | 548.6 (92.2)    | 546.4 (81.6)    | 493.8 (95.0)    | 503.0 (66.1)    |
| N                                      | 65              | 64              | 26              | 26              | 17              | 17              |
| <b>Average steps/day</b>               | 7314.1 (2749.9) | 6842.1 (3110.4) | 7500.7 (2794.0) | 6720.8 (3027.3) | 8346.4 (2533.7) | 8249.3 (2521.4) |
| N                                      | 64              | 64              | 26              | 26              | 16              | 16              |
| <b>Average aerobic steps/day</b>       | 1399.1 (1411.2) | 1190.9 (1294.2) | 1110.8 (1053.0) | 1061.9 (1128.2) | 1819.3 (1659.2) | 1726.8 (1122.0) |
| N                                      | 64              | 64              | 26              | 26              | 16              | 16              |

**Binary study outcomes<sup>c</sup>**

|                                                              | N (%)     |
|--------------------------------------------------------------|-----------|-----------|-----------|-----------|-----------|-----------|
| <b>CVD risk</b>                                              |           |           |           |           |           |           |
| Normal CVD risk                                              | 51 (76%)  | 55 (82%)  | 19 (73%)  | 21 (81%)  | 13 (76%)  | 14 (82%)  |
| Elevated CVD risk (z-score $\geq 1$ )                        | 16 (24%)  | 12 (18%)  | 7 (27%)   | 5 (19%)   | 4 (24%)   | 3 (18%)   |
| <b>Waist circumference</b>                                   |           |           |           |           |           |           |
| Normal                                                       | 45 (68%)  | 47 (70%)  | 22 (85%)  | 22 (85%)  | 9 (53%)   | 10 (59%)  |
| High (male $\geq 94$ cm, female $\geq 80$ cm)                | 21 (32%)  | 20 (30%)  | 4 (15%)   | 4 (15%)   | 8 (47%)   | 7 (41%)   |
| <b>Blood pressure</b>                                        |           |           |           |           |           |           |
| Normotensive                                                 | 45 (67%)  | 56 (84%)  | 18 (69%)  | 22 (85%)  | 11 (65%)  | 14 (82%)  |
| Hypertensive ( $\geq 130$ systolic / $\geq 85$ diastolic bp) | 22 (33%)  | 11 (16%)  | 8 (31%)   | 4 (15%)   | 6 (35%)   | 3 (18%)   |
| <b>Fasting glucose</b>                                       |           |           |           |           |           |           |
| Normal                                                       | 64 (98%)  | 64 (97%)  | 24 (96%)  | 25 (96%)  | 16 (94%)  | 16 (94%)  |
| Elevated ( $\geq 5.6$ mmol/L)                                | 1 (2%)    | 2 (3%)    | 1 (4%)    | 1 (4%)    | 1 (6%)    | 1 (6%)    |
| <b>HDL cholesterol</b>                                       |           |           |           |           |           |           |
| Normal                                                       | 55 (82%)  | 51 (78%)  | 20 (77%)  | 21 (81%)  | 16 (94%)  | 17 (100%) |
| Low (male $< 1.03$ mmol/L, female $< 1.30$ mmol/L)           | 12 (18%)  | 14 (22%)  | 6 (23%)   | 5 (19%)   | 1 (6%)    | 0 (0%)    |
| <b>Triglycerides</b>                                         |           |           |           |           |           |           |
| Normal                                                       | 54 (82%)  | 54 (84%)  | 21 (81%)  | 22 (85%)  | 15 (88%)  | 15 (94%)  |
| Elevated ( $\geq 1.7$ mmol/L)                                | 12 (18%)  | 10 (16%)  | 5 (19%)   | 4 (15%)   | 2 (12%)   | 1 (6%)    |
| <b>HbA1c</b>                                                 |           |           |           |           |           |           |
| Normal                                                       | 62 (94%)  | 60 (92%)  | 24 (100%) | 21 (84%)  | 16 (94%)  | 14 (82%)  |
| Elevated ( $\geq 5.7\%$ )                                    | 4 (6%)    | 5 (8%)    | 0 (0%)    | 4 (16%)   | 1 (6%)    | 3 (18%)   |
| <b>Insulin resistance (oGTT)</b>                             |           |           |           |           |           |           |
| No                                                           | 60 (95%)  | 58 (95%)  | 23 (92%)  | 25 (96%)  | 15 (100%) | 15 (100%) |
| Yes (glucose $\geq 7.8$ mmol/L at 2h of oGTT)                | 3 (5%)    | 3 (5%)    | 2 (8%)    | 1 (4%)    | 0 (0%)    | 0 (0%)    |
| <b>LDL cholesterol</b>                                       |           |           |           |           |           |           |
| Normal                                                       | 67 (100%) | 63 (100%) | 25 (100%) | 26 (100%) | 17 (100%) | 17 (100%) |
| Elevated ( $\geq 4.9$ mmol/l)                                | 0 (0%)    | 0 (0%)    | 0 (0%)    | 0 (0%)    | 0 (0%)    | 0 (0%)    |
| <b>BMI</b>                                                   |           |           |           |           |           |           |

|                                     |          |          |          |          |           |          |
|-------------------------------------|----------|----------|----------|----------|-----------|----------|
| BMI <25kg/m <sup>2</sup>            | 44 (66%) | 45 (67%) | 16 (62%) | 16 (62%) | 10 (59%)  | 9 (53%)  |
| BMI ≥25kg/m <sup>2</sup>            | 23 (34%) | 22 (33%) | 10 (38%) | 10 (38%) | 7 (41%)   | 8 (47%)  |
| <b>Total body fat proportion</b>    |          |          |          |          |           |          |
| Normal                              | 55 (82%) | 54 (82%) | 21 (84%) | 19 (76%) | 17 (100%) | 16 (94%) |
| High (male ≥20%, female ≥33%)       | 12 (18%) | 12 (18%) | 4 (16%)  | 6 (24%)  | 0 (0%)    | 1 (6%)   |
| <b>Reaching CDC recommendations</b> |          |          |          |          |           |          |
| <150 min MVPA/week                  | 9 (14%)  | 17 (27%) | 2 (8%)   | 3 (12%)  | 4 (24%)   | 2 (12%)  |
| ≥150 min MVPA/week                  | 56 (86%) | 47 (73%) | 24 (92%) | 23 (88%) | 13 (76%)  | 15 (88%) |
| <b>Total steps/day</b>              |          |          |          |          |           |          |
| <10'000 steps/day                   | 52 (81%) | 57 (89%) | 21 (81%) | 23 (88%) | 12 (75%)  | 11 (69%) |
| ≥10'000 steps/day                   | 12 (19%) | 7 (11%)  | 5 (19%)  | 3 (12%)  | 4 (25%)   | 5 (31%)  |

Abbreviations: abs., absolute; BP, blood pressure; CVD, cardiovascular disease; HbA1c, glycosylated haemoglobin; HDL, high density lipoprotein; LDL, low density lipoprotein; MVPA, moderate-to-vigorous physical activities; N, number; na, not available; oGTT, oral glucose tolerance test; rel., relative; SD, standard deviation; STS, sit-to-stand.

Footnotes:

The grey shadow covers the variables that were part of the primary CVD risk score.

<sup>a</sup> The average proportions of personal physical activity goal reached were based on the daily reporting of physical activities for the participants of the intervention group. Compliant controls were set to 0%. Non-compliant controls were excluded.

<sup>b</sup> Number of participants with information on the specific outcome at the specific time point (N non-missing).

<sup>c</sup> Column proportions were calculated based on available numbers for each variable.

**eTable 11. Dose-response relationship between reached physical activity goal<sup>a</sup> and all continuous outcomes; from linear regression model<sup>b</sup>**

|                                          | $\beta$<br>coefficient | 95% CI |   |        | p-value      |
|------------------------------------------|------------------------|--------|---|--------|--------------|
| <b>CVD risk score (primary; z-score)</b> | -0.02                  | -0.04  | - | 0.00   | <b>0.036</b> |
| Waist circumference (cm)                 | 0.08                   | -0.32  | - | 0.48   | 0.708        |
| Systolic blood pressure (mmHg)           | 0.11                   | -0.35  | - | 0.57   | 0.647        |
| Diastolic blood pressure (mmHg)          | 0.26                   | -0.11  | - | 0.62   | 0.172        |
| Fasting glucose (mmol/l)                 | 0.04                   | 0.01   | - | 0.07   | <b>0.003</b> |
| HDL cholesterol (mmol/l)                 | 0.01                   | -0.01  | - | 0.02   | 0.222        |
| Triglycerides (mmol/l)                   | -0.03                  | -0.08  | - | 0.03   | 0.292        |
| Absolute peak power (Watt)               | 2.11                   | 0.41   | - | 3.81   | <b>0.016</b> |
| HbA1c (%)                                | 0.03                   | 0.01   | - | 0.05   | <b>0.002</b> |
| Glucose, 2h oGTT (mmol/l)                | 0.01                   | -0.05  | - | 0.07   | 0.775        |
| Glucose change, 0 to 2h oGTT (mmol/l)    | 0.00                   | -0.06  | - | 0.05   | 0.929        |
| LDL cholesterol (mmol/l)                 | 0.04                   | 0.01   | - | 0.07   | <b>0.008</b> |
| BMI (kg/m <sup>2</sup> )                 | 0.07                   | -0.08  | - | 0.22   | 0.339        |
| Total body fat mass (kg)                 | 0.06                   | -0.21  | - | 0.34   | 0.641        |
| Total body fat proportion (%)            | 0.04                   | -0.16  | - | 0.24   | 0.720        |
| % predicted abs. peak power              | 0.80                   | 0.17   | - | 1.43   | <b>0.013</b> |
| Relative peak power (Watt/kg)            | 0.02                   | 0.00   | - | 0.05   | 0.063        |
| % predicted rel. peak power              | 0.77                   | 0.05   | - | 1.49   | <b>0.037</b> |
| Grip strength dominant (kg)              | 0.31                   | 0.01   | - | 0.62   | <b>0.043</b> |
| Grip strength non-dominant (kg)          | 0.13                   | -0.16  | - | 0.43   | 0.360        |
| Repetitions 1-min STS, 2nd trial         | 0.42                   | -0.07  | - | 0.91   | 0.089        |
| Total body lean body mass (kg)           | 0.12                   | -0.16  | - | 0.40   | 0.398        |
| Overall counts per minute                | 1.93                   | -3.01  | - | 6.87   | 0.440        |
| Time in MVPA (min/day)                   | 0.13                   | -0.60  | - | 0.86   | 0.722        |
| Time sedentary (min/day)                 | -0.49                  | -3.60  | - | 2.62   | 0.754        |
| Average steps/day                        | 59.71                  | -57.72 | - | 177.13 | 0.316        |
| Average aerobic steps/day                | 19.33                  | -28.56 | - | 67.23  | 0.425        |

Abbreviations: abs., absolute; BP, blood pressure; CVD, cardiovascular disease; HbA1c, glycosylated haemoglobin; HDL, high density lipoprotein; ITT, intention-to-treat; LDL, low density lipoprotein; MVPA, moderate-to-vigorous physical activities; oGTT, oral glucose tolerance test; rel., relative; SD, standard deviation; STS, sit-to-stand.

Footnotes:

The grey shadow covers the variables that were part of the primary CVD risk score.

<sup>a</sup> The average proportions of personal physical activity goal reached were based on the daily reporting of physical activities for the participants of the intervention group. Compliant controls were set to 0%. Non-compliant controls were excluded.

<sup>b</sup> Results from linear regression models with proportion of physical activity goal reached as independent variable (continuous) adjusted for sex and main diagnostic group. The  $\beta$ -coefficients show the change in the outcome from baseline to 12 months post-randomization per 10% increase in the activity goal reached. See also eFigure 4 for a graphical display of the same results reported in eTable 11.

**eTable 9. Intervention effect (marginal mean difference from randomization) of the primary CVD risk score at each study time point with intention-to-treat allocation and stratified by anthracycline received; from mixed effects generalized linear model**

|            | Time point 6 months<br>(change in CVD risk score from baseline to 6 months post-randomization) |                |                   |               |                                   |               |         | Time point 12 months<br>(change in CVD risk score from baseline to 12 months post-randomization) |                |                   |               |                                   |                |              |
|------------|------------------------------------------------------------------------------------------------|----------------|-------------------|---------------|-----------------------------------|---------------|---------|--------------------------------------------------------------------------------------------------|----------------|-------------------|---------------|-----------------------------------|----------------|--------------|
|            | Intervention group                                                                             |                | Control group     |               | Difference Intervention - Control |               |         | Intervention group                                                                               |                | Control group     |               | Difference Intervention - Control |                |              |
|            | Marginal estimate                                                                              | 95% CI         | Marginal estimate | 95% CI        | Marginal estimate                 | 95% CI        | p-value | Marginal estimate                                                                                | 95% CI         | Marginal estimate | 95% CI        | Marginal estimate                 | 95% CI         | p-value      |
| Anthra.    | -0.19                                                                                          | -0.30 to -0.07 | -0.06             | -0.16 to 0.05 | -0.13                             | -0.28 to 0.03 | 0.112   | -0.23                                                                                            | -0.35 to -0.11 | -0.02             | -0.13 to 0.08 | -0.21                             | -0.37 to -0.05 | <b>0.009</b> |
| No Anthra. | -0.14                                                                                          | -0.23 to -0.05 | -0.01             | -0.11 to 0.10 | -0.13                             | -0.27 to 0.01 | 0.065   | -0.19                                                                                            | -0.28 to -0.09 | -0.09             | -0.20 to 0.02 | -0.10                             | -0.24 to 0.05  | 0.180        |

Footnote: The estimates represent the change in the CVD risk score [z-score] from baseline to 6 and 12 months post-randomization for the intervention and control group. A negative score represents a reduction in the CVD risk and therefore a favourable outcome. The group allocation was based on ITT (intention-to-treat). The models were adjusted for sex, main diagnostic group and baseline CVD risk score.  $P_{\text{interaction}}$  for effect modification by anthracycline = 0.984. Numbers: model with anthracyclines, n=96; model without anthracyclines, n=55. See eFigure 5 for a graphical display of the same results.

Abbreviations: Anthra, Anthracyclines; CI, confidence interval; CVD, cardiovascular disease; ITT, intention to treat.

**eTable 13. Overview of adverse events (N=170)**

|                                                  | <b>Control group<br/>(N = 78)</b> | <b>Intervention group<br/>(N = 91)</b> |
|--------------------------------------------------|-----------------------------------|----------------------------------------|
| <b>Duration of adverse event</b>                 |                                   |                                        |
| Median (Q1, Q3) [days]                           | 14.0 (5.0, 35.0)                  | 9.0 (5.0, 28.0)                        |
| <b>Number of AE per person</b>                   |                                   |                                        |
| 1                                                | 22 (52%)                          | 21 (46%)                               |
| 2                                                | 11 (26%)                          | 13 (28%)                               |
| 3                                                | 6 (14%)                           | 8 (17%)                                |
| 4                                                | 0 (0%)                            | 1 (2%)                                 |
| 5                                                | 2 (5%)                            | 2 (4%)                                 |
| 6                                                | 1 (2%)                            | 1 (2%)                                 |
| <b>AE Grade (1-5)</b>                            |                                   |                                        |
| Grade 1: mild                                    | 33 (42%)                          | 52 (57%)                               |
| Grade 2: moderate                                | 40 (51%)                          | 35 (38%)                               |
| Grade 3: severe                                  | 5 (6%)                            | 3 (3%)                                 |
| Grade 4: life threatening                        | 0 (0%)                            | 1 (1%)                                 |
| <b>Relationship to the exercise intervention</b> |                                   |                                        |
| No                                               | 75 (96%)                          | 72 (79%)                               |
| Unlikely                                         | 3 (4%)                            | 8 (9%)                                 |
| Likely <sup>a</sup>                              | 0 (0%)                            | 11 (12%)                               |
| <b>Resulted in withdrawal from the study</b>     |                                   |                                        |
| No                                               | 77 (99%)                          | 90 (99%)                               |
| Yes                                              | 1 (1%)                            | 1 (1%) <sup>b</sup>                    |
| <b>Seriousness of AE?</b>                        |                                   |                                        |
| Serious                                          | 4 (5%) <sup>c</sup>               | 4 (4%) <sup>d</sup>                    |
| Not serious                                      | 74 (95%)                          | 87 (96%)                               |

Abbreviations: AE, adverse event; N, number; Q, quartile.

<sup>a</sup> AEs that were judged as being likely related to the intervention included six mild events (grade 1: bruising (1), fall (1), musculoskeletal and connective tissue disorder (4)), four moderate events (grade 2: back pain (2), depression (1), musculoskeletal and connective tissue disorder (1), and one severe event (grade 3: psychiatric disorder).

<sup>b</sup> The 2 AEs that resulted in withdrawal from the study included: one psychiatric disorder, grade 3 [severe], one Neoplasms benign, malignant and unspecified, grade 3 [severe].

<sup>c</sup> Serious AEs in the control group included: two gastrointestinal disorders, one neoplasm and one syncope.

<sup>d</sup> Serious AEs in the intervention group included: one appendicitis, one nervous system disorder, one psychiatric disorder and one surgical and medical procedure.



**eTable 14. Description of adverse events according to CTCAE categories (N=170)**

|                                                                             | Control group<br>(N = 78) | Intervention group<br>(N = 91) |
|-----------------------------------------------------------------------------|---------------------------|--------------------------------|
| <b>Adverse event name (CTCAE)</b>                                           |                           |                                |
| Abdominal infection                                                         | 1 (1%)                    | 0 (0%)                         |
| Allergic reaction                                                           | 1 (1%)                    | 1 (1%)                         |
| Anaemia                                                                     | 0 (0%)                    | 1 (1%)                         |
| Appendicitis                                                                | 0 (0%)                    | 1 (1%)                         |
| Back pain                                                                   | 6 (8%)                    | 3 (3%)                         |
| Bladder infection                                                           | 1 (1%)                    | 0 (0%)                         |
| Bone pain                                                                   | 1 (1%)                    | 0 (0%)                         |
| Breast infection                                                            | 1 (1%)                    | 0 (0%)                         |
| Bronchial infection                                                         | 3 (4%)                    | 2 (2%)                         |
| Bruising                                                                    | 3 (4%)                    | 3 (3%)                         |
| Common cold                                                                 | 1 (1%)                    | 1 (1%)                         |
| Conjunctivitis                                                              | 2 (3%)                    | 0 (0%)                         |
| Cough                                                                       | 0 (0%)                    | 2 (2%)                         |
| Depression                                                                  | 1 (1%)                    | 6 (7%)                         |
| Diarrhoea                                                                   | 3 (4%)                    | 0 (0%)                         |
| Dizziness                                                                   | 0 (0%)                    | 1 (1%)                         |
| Dysmenorrhea                                                                | 1 (1%)                    | 0 (0%)                         |
| Ear and labyrinth disorders - Other                                         | 1 (1%)                    | 1 (1%)                         |
| Endocrine disorders - Other                                                 | 1 (1%)                    | 0 (0%)                         |
| Erythema multiforme                                                         | 2 (3%)                    | 0 (0%)                         |
| External ear pain                                                           | 1 (1%)                    | 0 (0%)                         |
| Fall                                                                        | 1 (1%)                    | 3 (3%)                         |
| Fever                                                                       | 1 (1%)                    | 0 (0%)                         |
| Flu like symptoms                                                           | 7 (9%)                    | 14 (15%)                       |
| Fracture                                                                    | 1 (1%)                    | 2 (2%)                         |
| Gastroenteritis                                                             | 1 (1%)                    | 0 (0%)                         |
| Gastrointestinal disorders                                                  | 8 (10%)                   | 6 (7%)                         |
| Gastrointestinal pain                                                       | 0 (0%)                    | 1 (1%)                         |
| General disorders and administration site conditions - Other                | 0 (0%)                    | 1 (1%)                         |
| Headache                                                                    | 2 (3%)                    | 0 (0%)                         |
| Haemorrhoids                                                                | 0 (0%)                    | 1 (1%)                         |
| Hypertension                                                                | 1 (1%)                    | 0 (0%)                         |
| Infections and infestations - Other                                         | 2 (3%)                    | 3 (3%)                         |
| Injury, poisoning and procedural complications - Other                      | 4 (5%)                    | 3 (3%)                         |
| Insomnia                                                                    | 1 (1%)                    | 0 (0%)                         |
| Lung infection                                                              | 0 (0%)                    | 1 (1%)                         |
| Middle ear inflammation                                                     | 1 (1%)                    | 1 (1%)                         |
| Musculoskeletal and connective tissue disorder                              | 4 (5%)                    | 12 (13%)                       |
| Myalgia                                                                     | 1 (1%)                    | 0 (0%)                         |
| Nail infection                                                              | 0 (0%)                    | 1 (1%)                         |
| Nausea                                                                      | 0 (0%)                    | 1 (1%)                         |
| Neoplasms benign, malignant and unspecified (incl cysts and polyps) - Other | 1 (1%)                    | 0 (0%)                         |
| Nervous system disorders - Other                                            | 1 (1%)                    | 2 (2%)                         |
| Pain                                                                        | 1 (1%)                    | 2 (2%)                         |
| Psychiatric disorders                                                       | 0 (0%)                    | 1 (1%)                         |
| Respiratory, thoracic and mediastinal disorders - Other                     | 0 (0%)                    | 4 (4%)                         |
| Rhinitis infective                                                          | 1 (1%)                    | 0 (0%)                         |
| Sinusitis                                                                   | 0 (0%)                    | 1 (1%)                         |
| Skin and subcutaneous tissue disorders                                      | 2 (3%)                    | 3 (3%)                         |
| Skin papilloma                                                              | 1 (1%)                    | 0 (0%)                         |

|                                 |        |        |
|---------------------------------|--------|--------|
| Stomach pain                    | 0 (0%) | 1 (1%) |
| Surgical and medical procedures | 4 (5%) | 2 (2%) |
| Syncope                         | 1 (1%) | 0 (0%) |
| Tooth infection                 | 0 (0%) | 1 (1%) |
| Toothache                       | 0 (0%) | 1 (1%) |
| Tracheitis                      | 1 (1%) | 0 (0%) |
| Urinary tract infection         | 0 (0%) | 1 (1%) |

---

Abbreviations: CTCAE, Common Terminology Criteria for Adverse Events.

#### 4. SUPPLEMENTARY FIGURES

**eFigure 1. Individual trajectories for the primary and secondary continuous outcomes by randomized group allocation (ITT)**

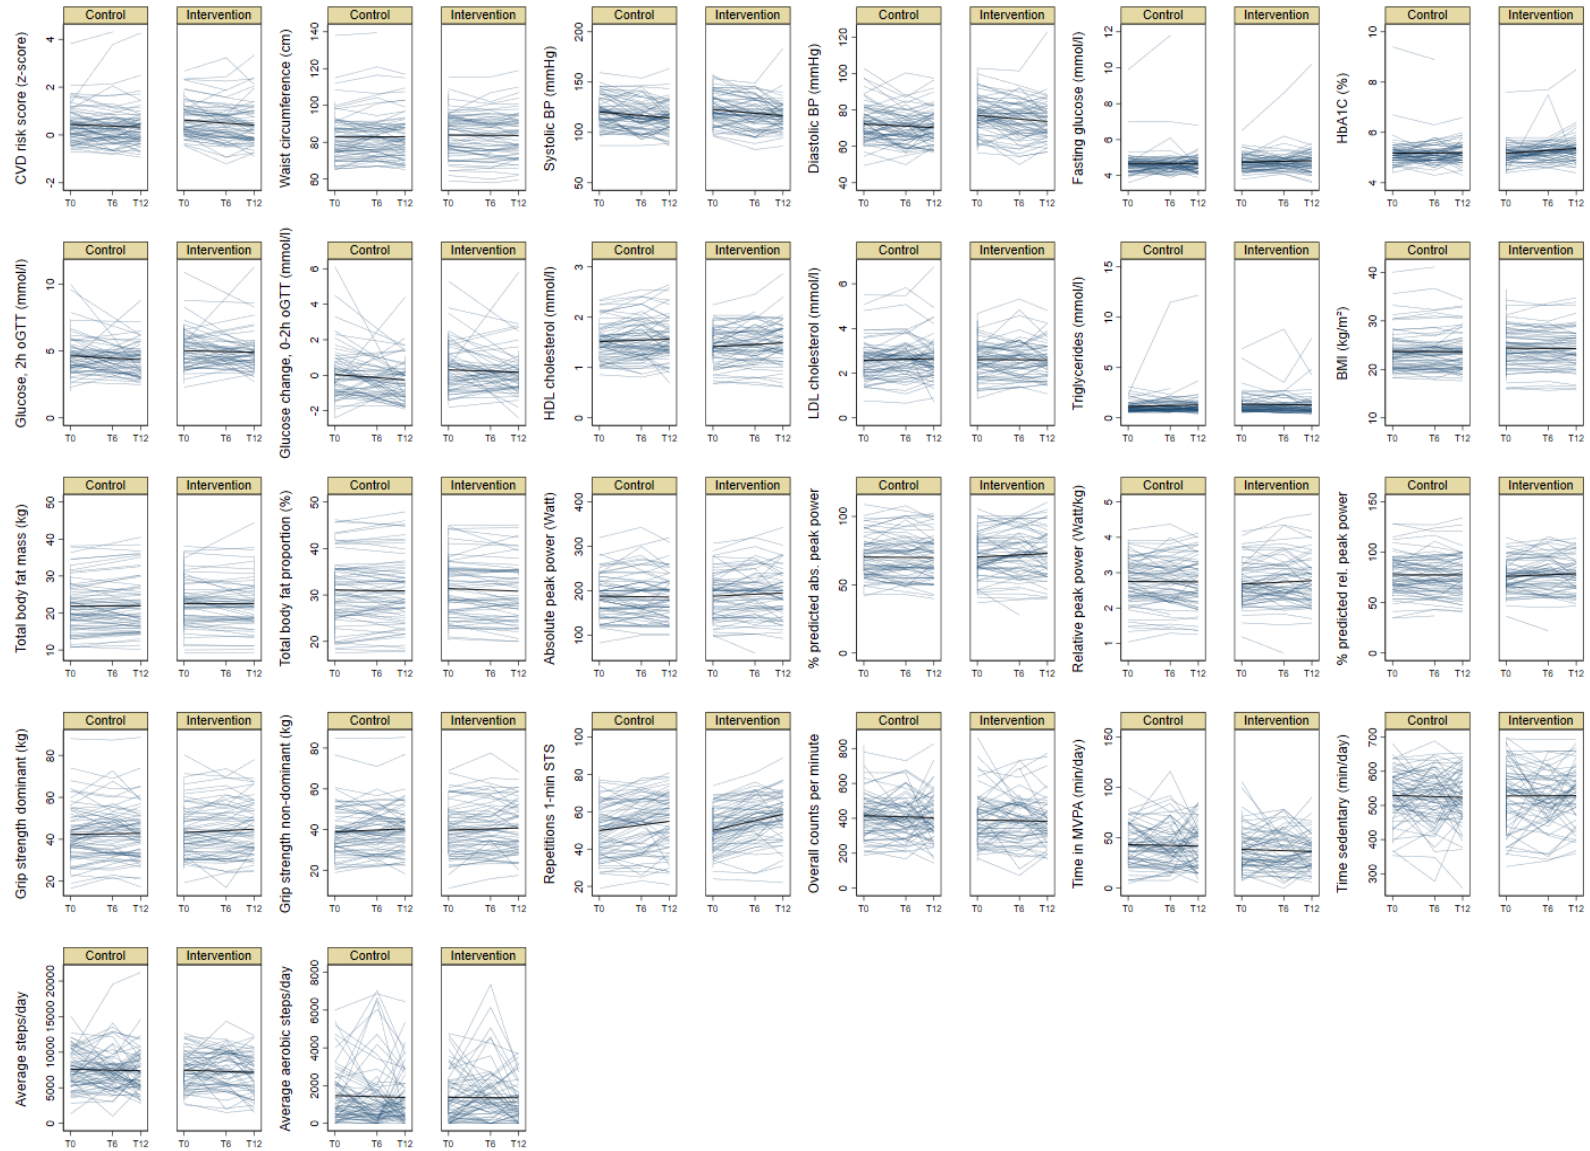

eFigure 1 shows the individual trajectories of all participants for each of the primary and secondary continuous outcomes stratified by intention-to-treat (as randomized) study group allocation. The dark line in each plot represents the average across the individual trajectories. Cave: the intervals of the y-axes differ depending on the unit of the respective outcome. The unit is provided in y-axis label of each graph.

Abbreviations: abs, absolute; CVD, cardiovascular disease; BMI, body mass index; BP, blood pressure; HbA1C, glycosylated haemoglobin; HDL, high-density lipoprotein; ITT, intention-to-treat; LDL, low-density lipoprotein; MVPA, moderate-to-vigorous physical activities; oGTT, oral glucose tolerance test; rel., relative; STS, sit-to-stand test; T0, time point 0 (baseline); T6, time point 6 months post-randomization; T12, time point 12 months post-randomization.

**eFigure 2. Marginal mean changes of the remaining secondary continuous outcomes for the intention-to-treat (ITT) and three per protocol (PP) analyses**

**A - ITT**

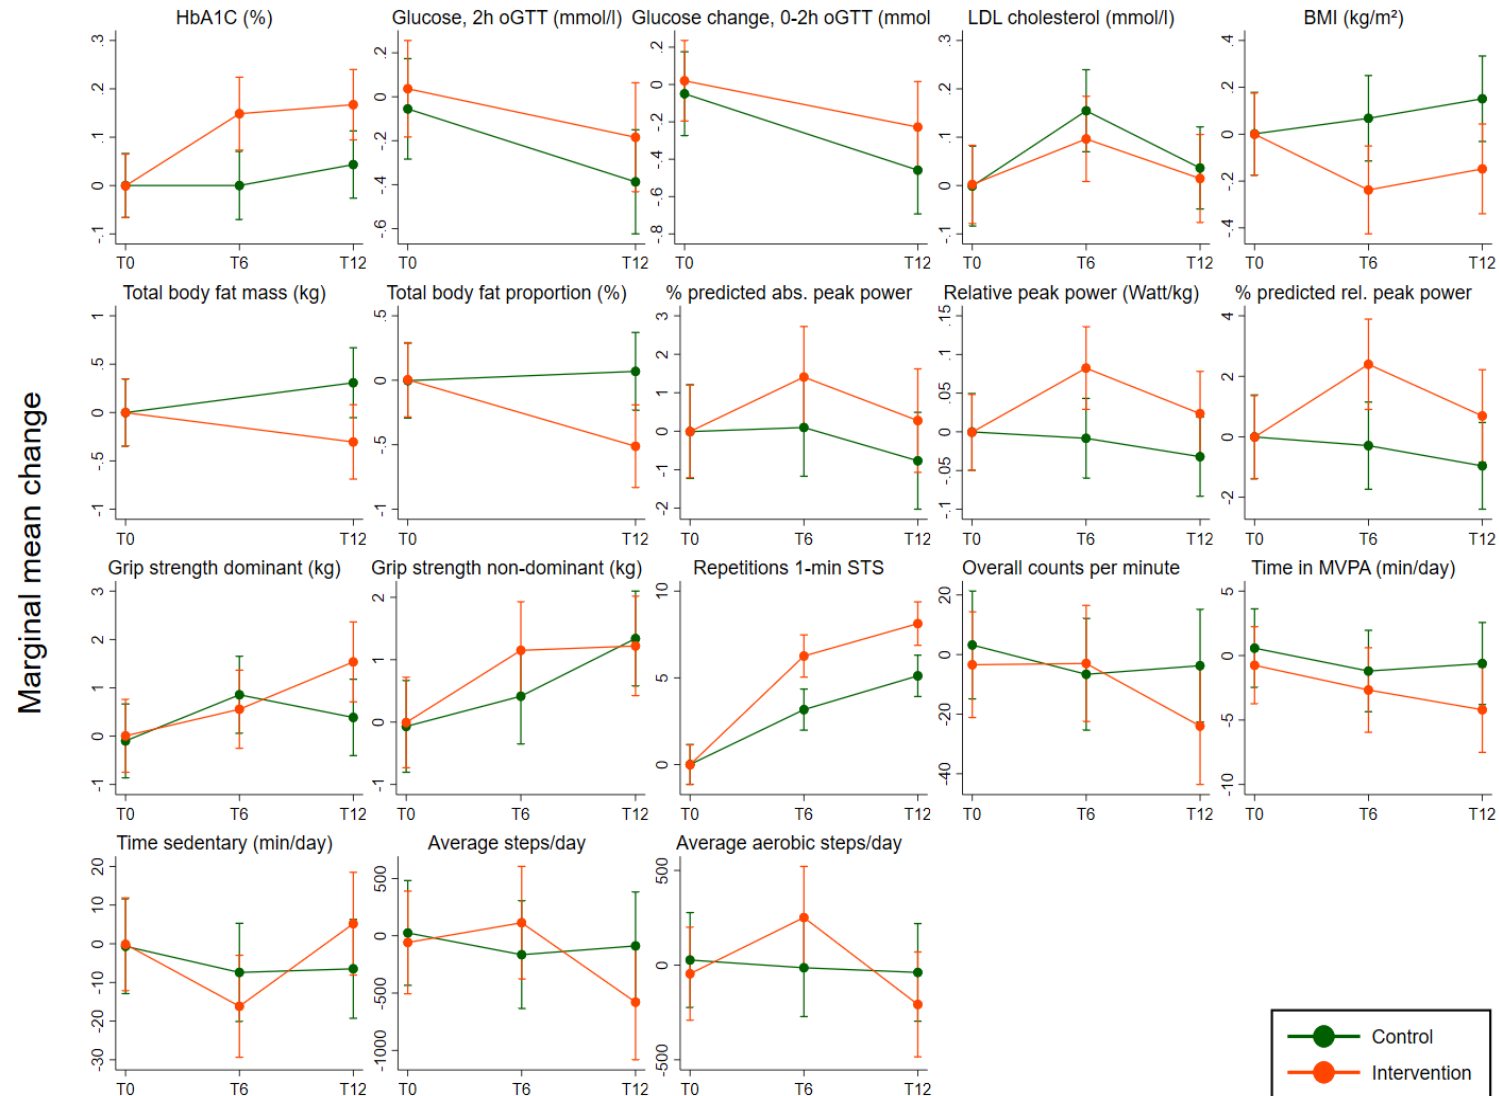

**B – PP1**

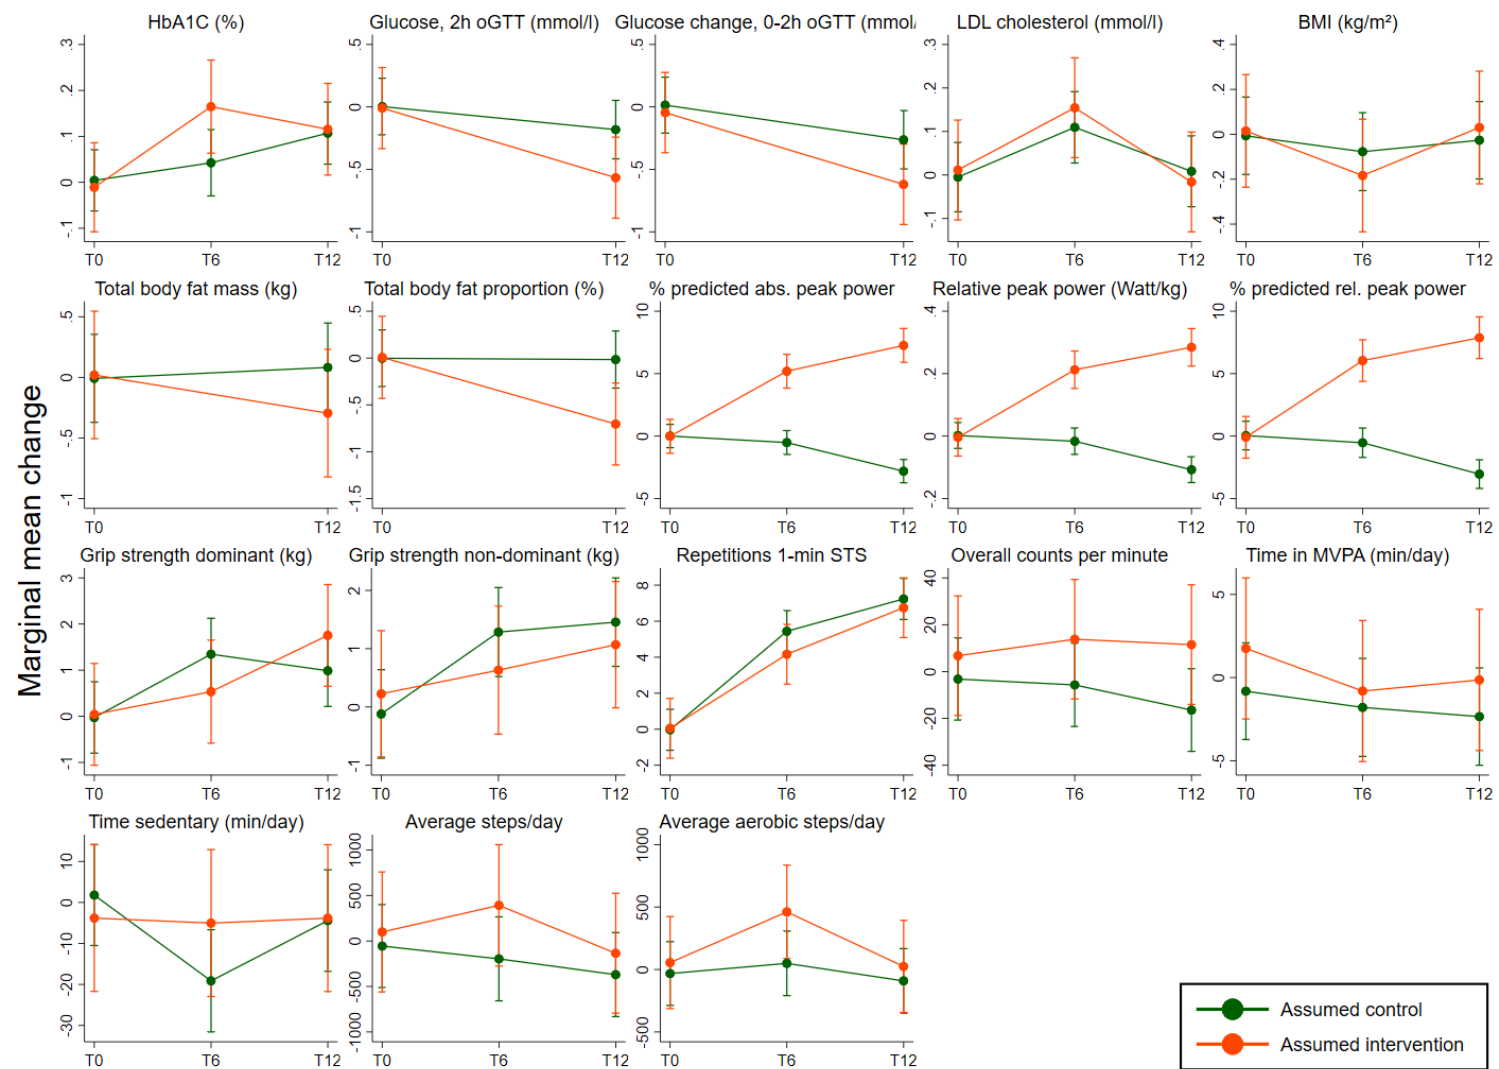

C – PP2

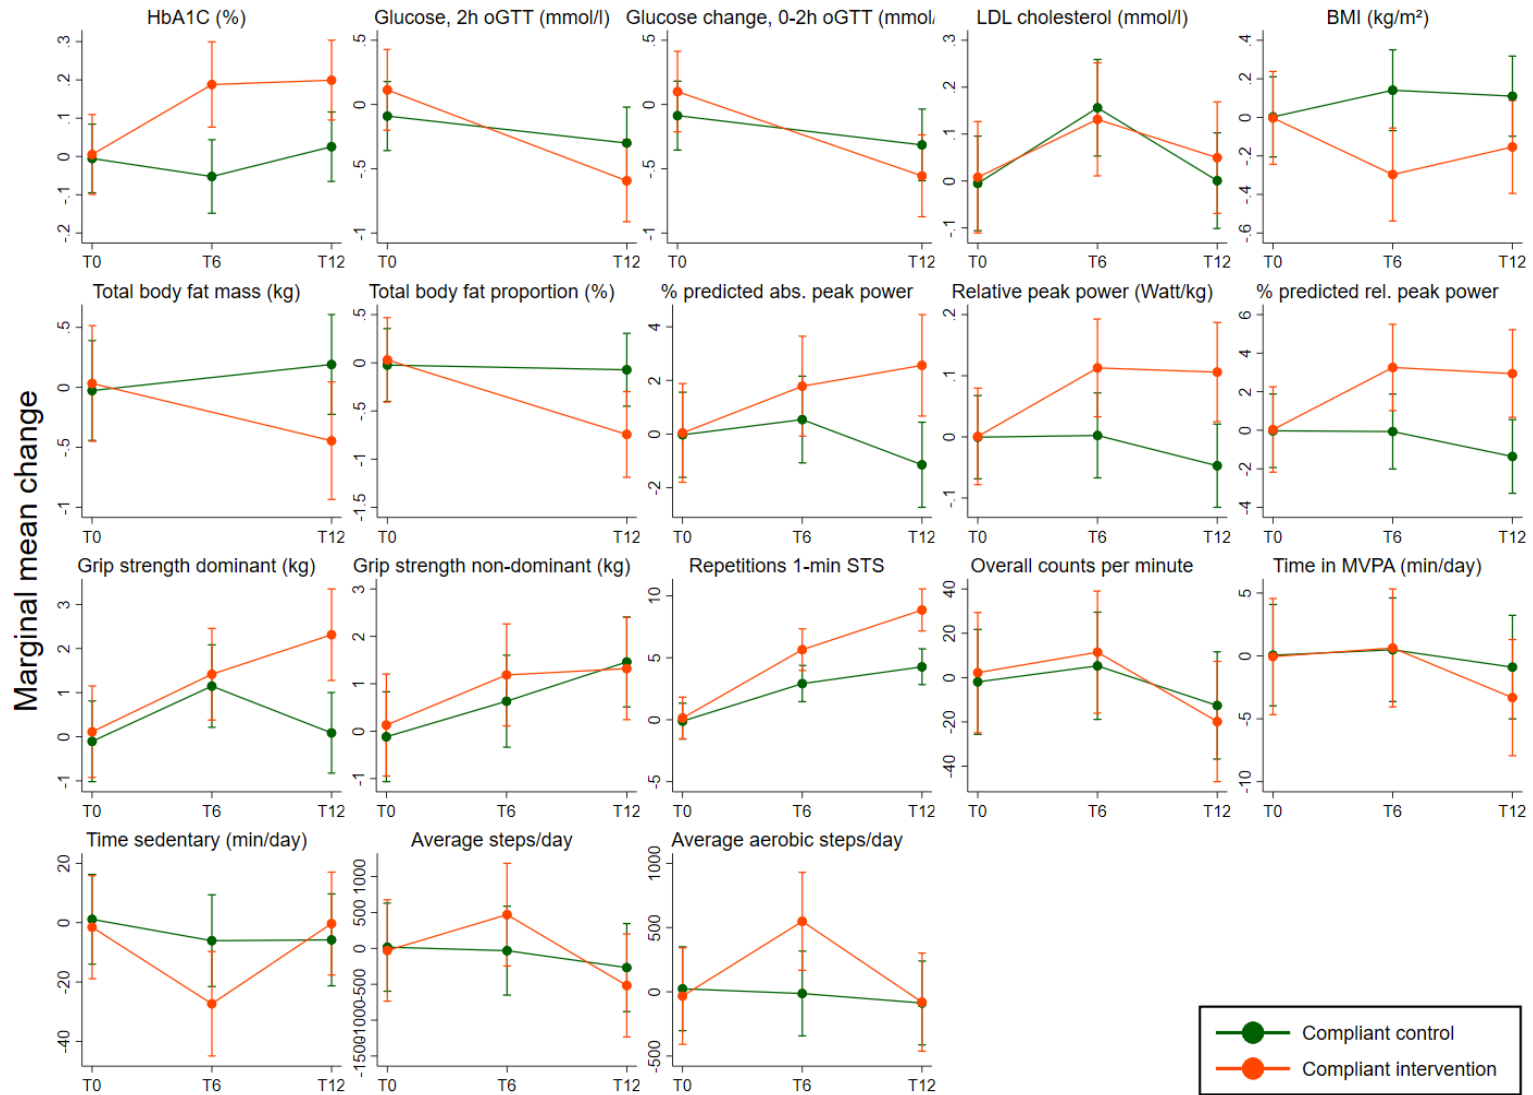

D – PP3

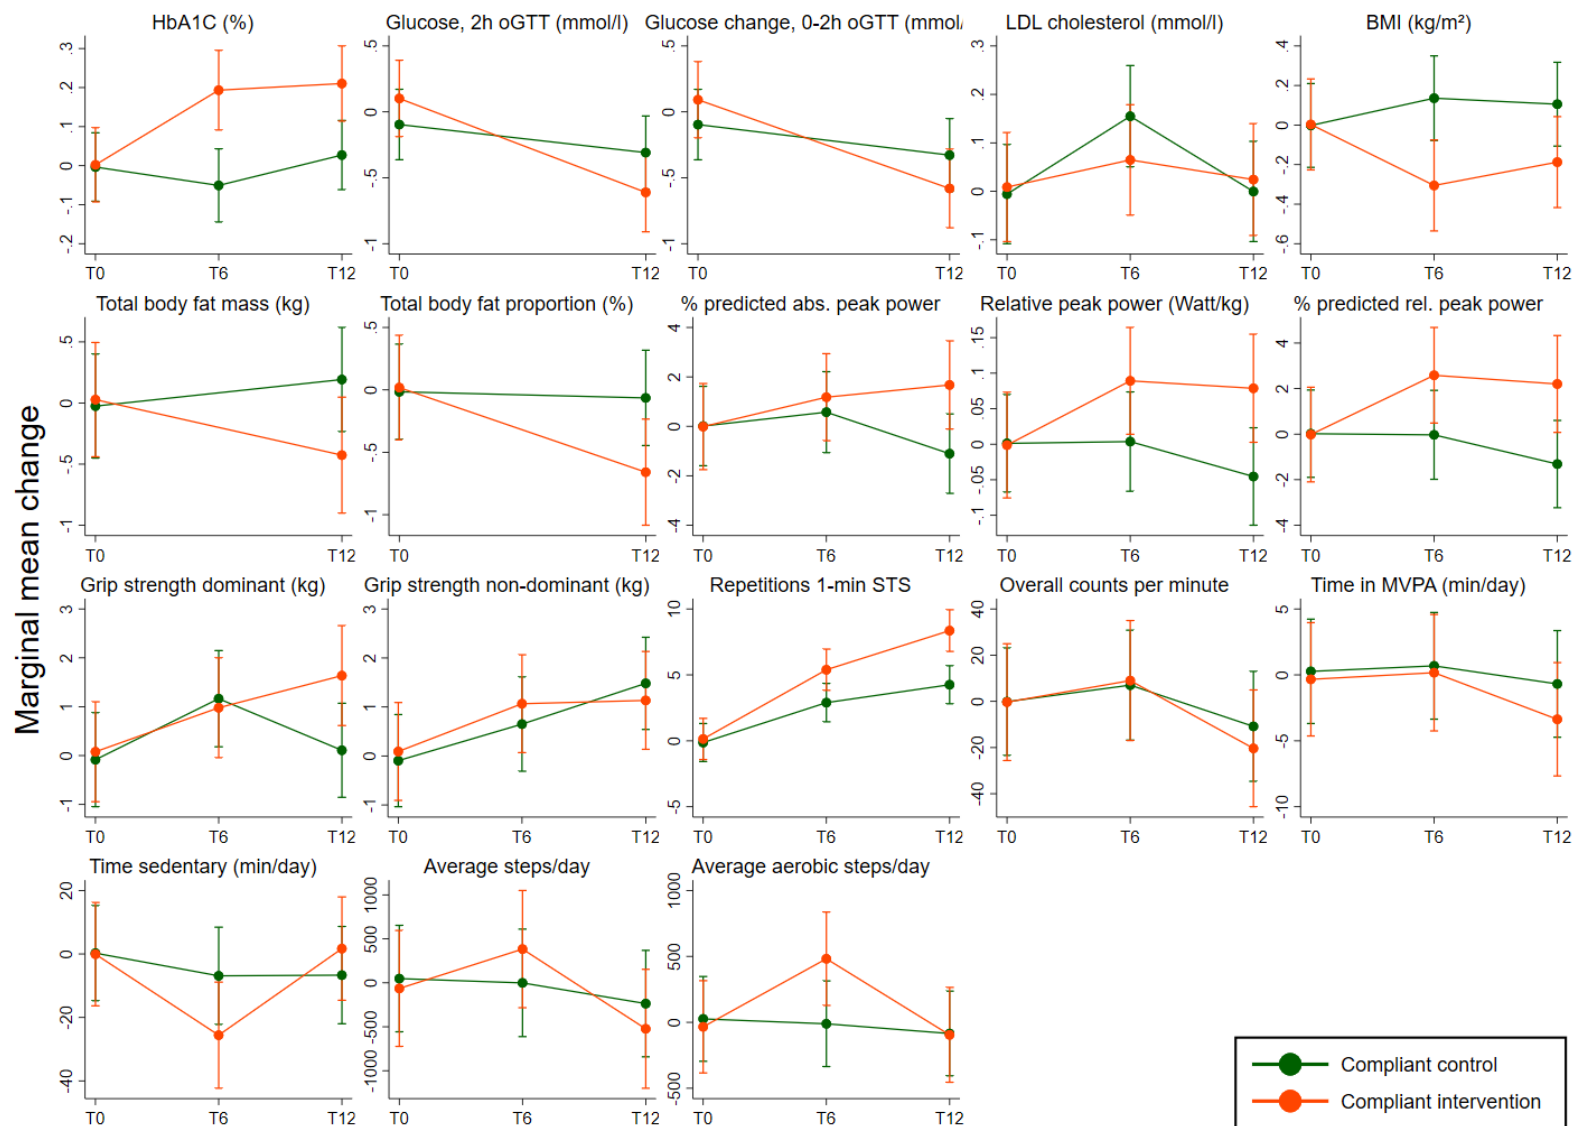

eFigure 2 shows the marginal mean changes and 95% confidence intervals of all remaining continuous secondary outcomes (not part of the composite cardiovascular disease (CVD) risk score) from baseline to 6 and 12 months post-randomization for the intervention and control group. Estimates from mixed effects generalized linear models adjusted for sex, main diagnostic group and baseline value of the respective outcome. T0, T6 and T12 denote the study time



points: T0=baseline; T6=6 months post-randomization; T12=12 months post-randomization. The group allocation differed for each panel. Panel A: ITT (intention-to-treat): allocation as randomized (N=151). Panel B: PP1 (per protocol analysis 1): control group included participants with <5% increase in maximal power, intervention group included participants with  $\geq 5\%$  increase in maximal power (N=112). Panel C: PP2 (per protocol analysis 2): included compliant intervention and control participants only, based on daily self-reported physical activity data with missing days set to 0 activities (N=82). Panel D: PP3 (per protocol analysis 3): included compliant intervention and control participants only, based on daily self-reported physical activity data with missing days set to the annual average of activities (N=87). For each model, all participants with valid baseline measurement of the respective outcome were included. See eTables 6-9 for the exact point estimates. Cave: the intervals of the y-axes differ depending on the unit of the respective outcome. The unit is provided in brackets after the outcome, in the title of each graph.

Abbreviations: abs, absolute; BMI, body mass index; HbA1C, glycosylated haemoglobin; LDL, low-density lipoprotein; MVPA, moderate-to-vigorous physical activities; oGTT, oral glucose tolerance test; rel., relative; STS, sit-to-stand test; T0, time point 0 (baseline); T6, time point 6 months post-randomization; T12, time point 12 months post-randomization.

**eFigure 3. Description of the categorical study outcomes by randomized group allocation (ITT) and study time point**

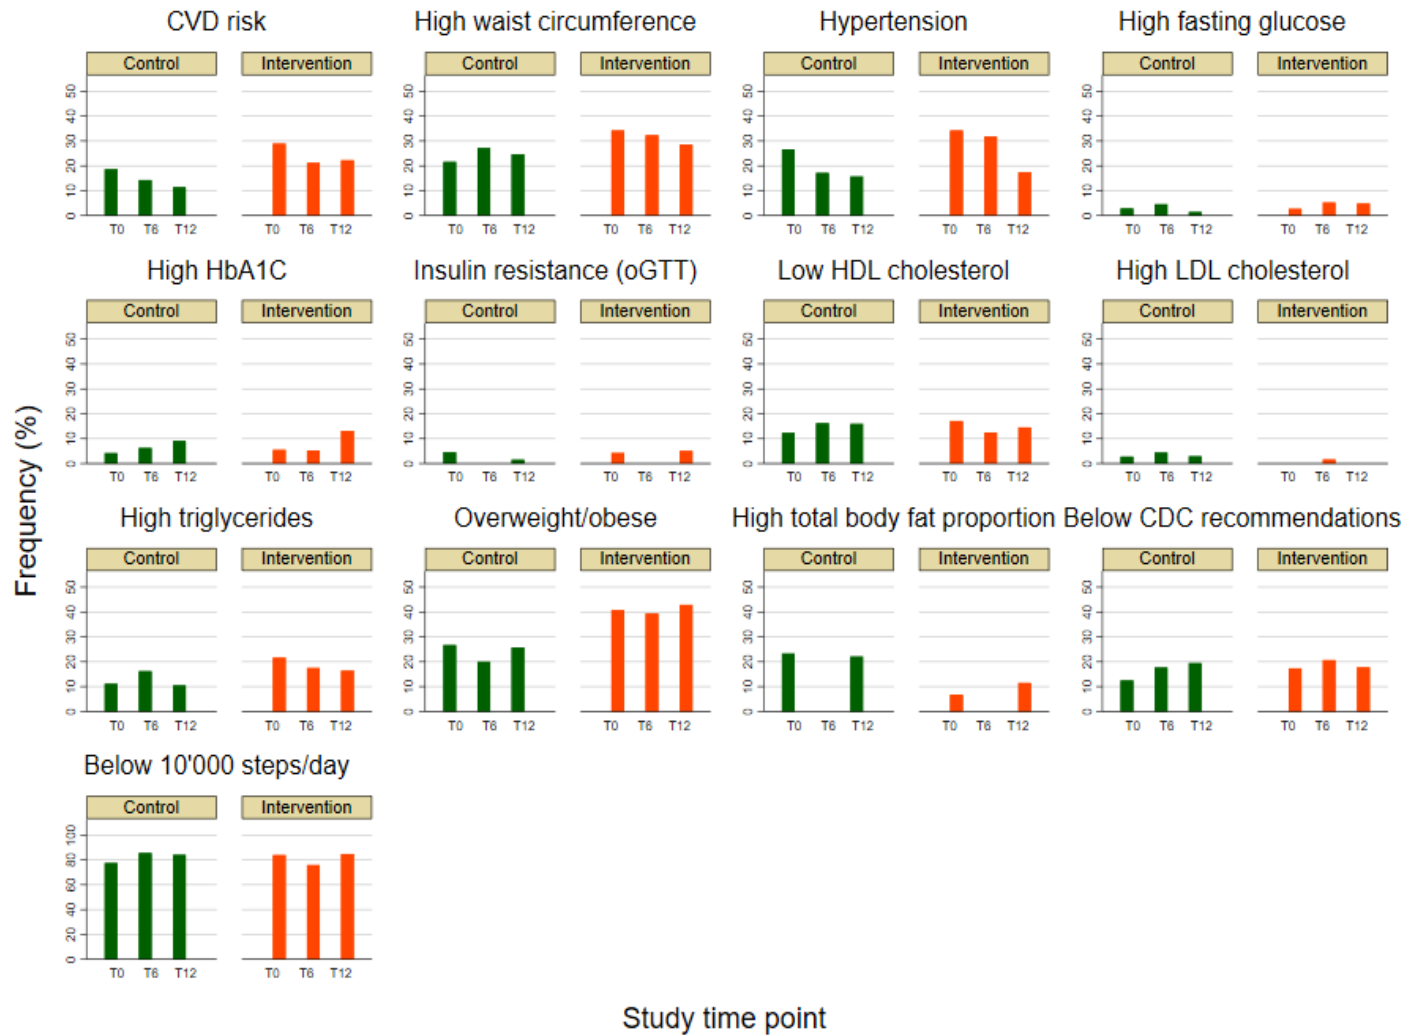

eFigure 3 shows the proportion of participants with an unfavourable result in each of the respective binary study outcomes, stratified by randomized group allocation (ITT) and study time point. Proportions are based on available data at each time point. See Table 2 for the exact numbers and proportions in each cell as well as definitions of cut-offs for each variable. Cave: that last graph has a different y-axis interval.

Abbreviations: CVD, cardiovascular disease; CDC, Centre for Disease Control and Prevention; ITT, intention-to-treat; LDL, low-density lipoprotein; oGTT, oral glucose tolerance test; T0, time point 0 (baseline); T6, time point 6 months post-randomization; T12, time point 12 months post-randomization.

**eFigure 4. Dose-response relationship between the proportion of physical activity goal reached and each continuous outcome**

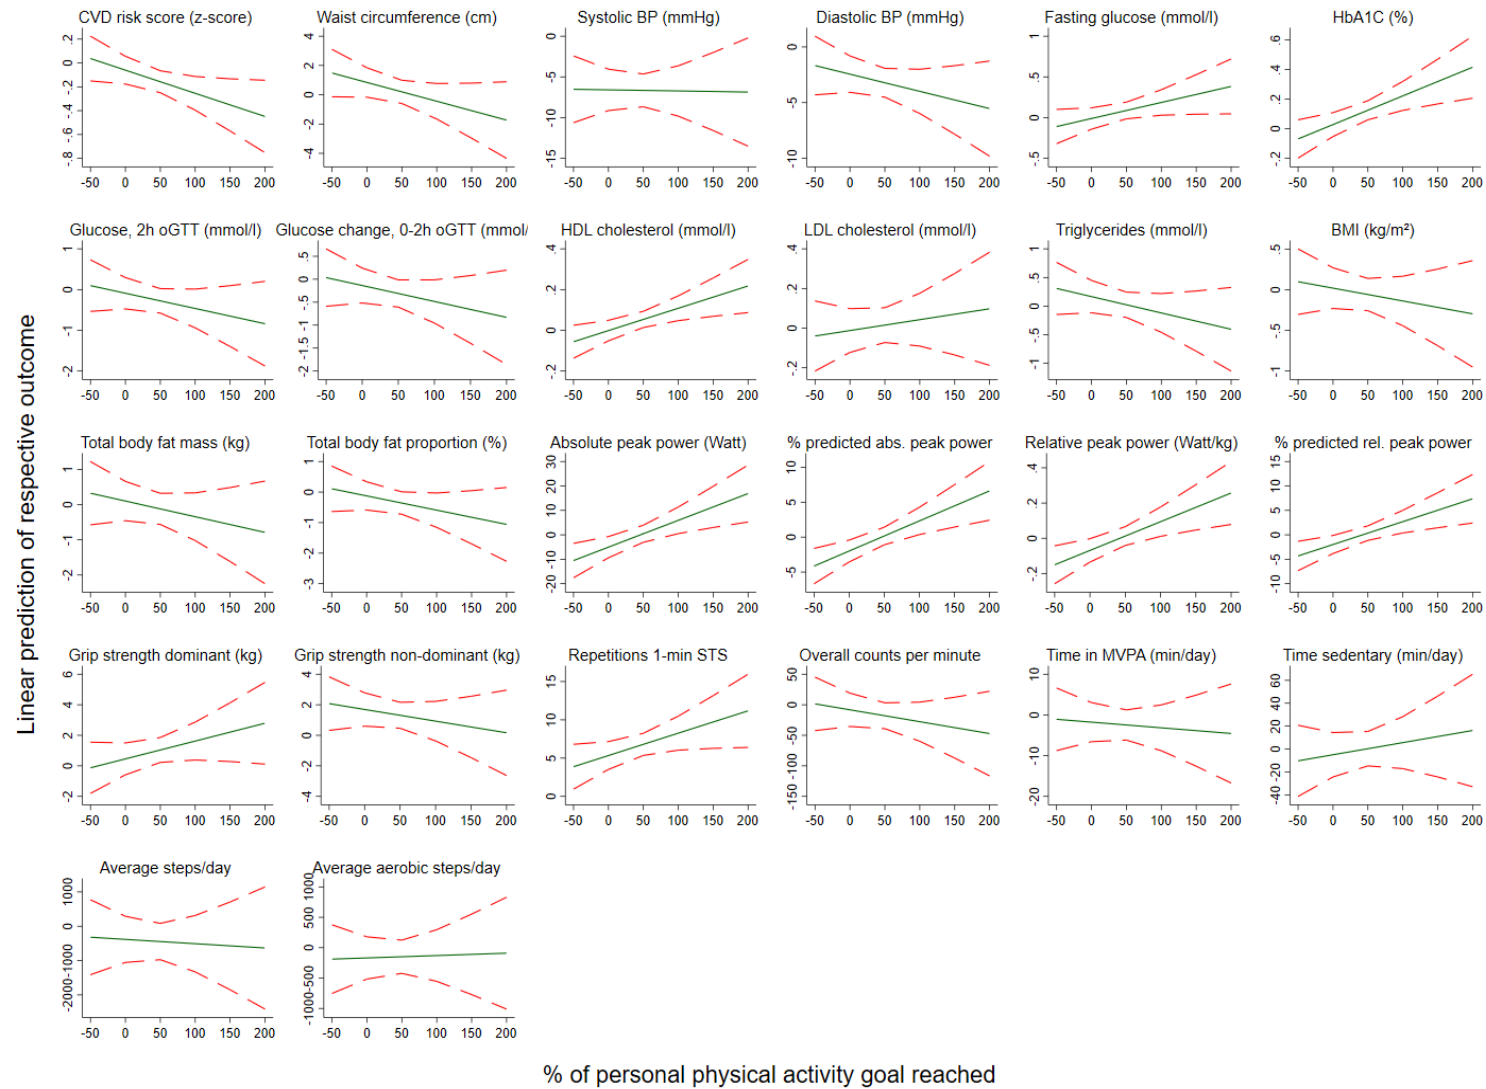

eFigure 4 shows the marginal linear predictions (green line) and 95% confidence bands (red dashed lines) of the dose-response relationship between the proportion of physical activity goal reached and the change from baseline (T0) to 12 months post-randomization (T12) for all continuous study outcomes. The average proportion of personal physical activity goal reached for the intervention participants was based on the daily reporting of physical activities. Compliant controls were set to 0%. Non-compliant controls were excluded. The models were adjusted for sex and main diagnostic group and based on complete case analysis. See eTable 11 for the exact marginal mean change per 10% increase in the activity goal reached. Cave: the intervals of the y-axes differ depending on the unit of the respective outcome. The unit is provided in brackets after the outcome, in the title of each graph.

Abbreviations: abs., absolute; CVD, cardiovascular disease; HbA1C, glycosylated haemoglobin; HDL, high density lipoprotein; LDL, low density lipoprotein; MVPA, moderate-to-vigorous physical activities; oGTT, oral glucose tolerance test; rel., relative; STS, sit-to-stand.

**eFigure 5. Marginal mean changes of the CVD risk score (primary outcome) over time for the intention-to-treat (ITT) allocation, by study group and anthracycline received**

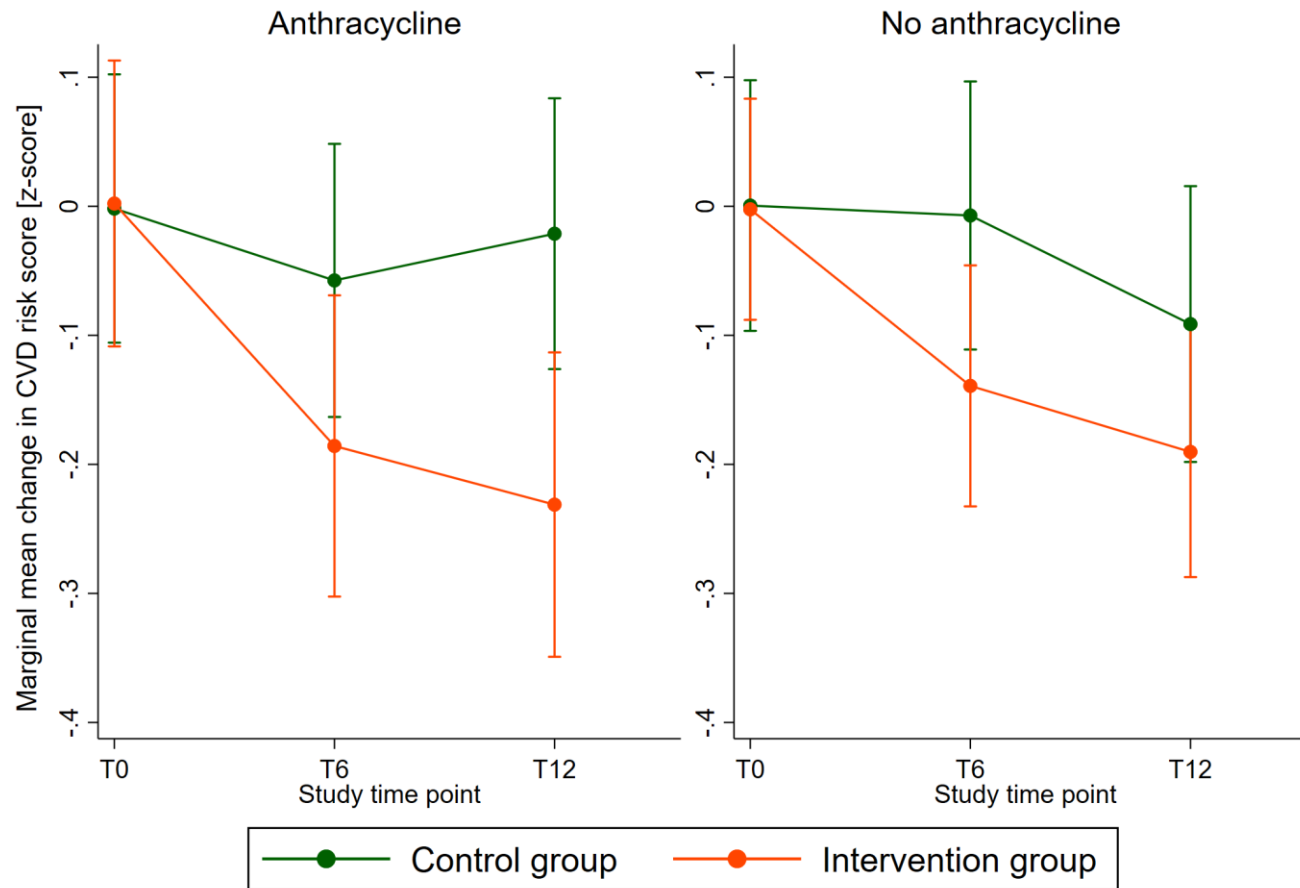

eFigure 5 shows the marginal mean changes and 95% confidence intervals of the cardiovascular disease (CVD) risk score [z-score, primary outcome] from baseline to 6 and 12 months post-randomization for the intervention and control group stratified for participants who received and did not receive anthracycline as part of their cancer treatment. Estimates from mixed effects generalized linear models adjusted for sex, main diagnostic group and baseline CVD risk score. T0, T6 and T12 denote the study time points: T0=baseline; T6=6 months post-randomization; T12=12 months post-randomization. Group allocation was based on intention-to-treat (ITT).  $P_{\text{interaction}}$  for effect modification by anthracycline = 0.984. Numbers: model with anthracyclines, n=96; model without anthracyclines, n=55. See eTable 12 for the exact point estimates.

Abbreviations: CVD, cardiovascular disease.

## 5. ORIGINAL DOCUMENTS OF THE PHYSICAL ACTIVITY INTERVENTION

On the following pages are the original documents attached, that were used for the physical activity recommendations at baseline and during follow-up by the study physiotherapists.

A – Physician report form: this form was used to provide the physiotherapist with essential medical information relevant for the PA recommendations. The form also included the heartrate at 60% VO<sub>2</sub>max from the cardiopulmonary exercise test.

B – Physical activity interview: this form was used to assess the current PA level and type of activities performed as basis for future recommendations.

C – Motivational interview guideline: this form was used to assess the participant's preferences, motivation, and barriers in regard of PA.

D – Physical activity contract: this form was handed out to the participant and described the agreed activities implemented into a usual week.

E – General PA flyer: each participant of the intervention group received this flyer with general tips to increase physical activities and some strength building exercises to perform at home.

F – Instruction to measure the heart rate: participants were informed about their optimal training heart rate and instructed how to measure their heart rate.

G – Guideline follow-up interview: this form represents the guideline for the interview performed at each follow-up contact between the physiotherapist and survivor.



## Physician Report Form

Das nachfolgende Dokument beinhaltet wichtige medizinische Parameter für das Erstgespräch der Interventionsgruppe mit der Physiotherapie. Die Daten werden aus REDCap exportiert (siehe unten).

### 1. Basic information

ID: \_\_\_\_\_ Date of examination (T0a): \_\_\_\_\_  
Age: \_\_\_\_\_ years Blood pressure at rest (mean): \_\_\_\_\_:\_\_\_\_\_ mmHg  
Height: \_\_\_\_\_ cm Weight: \_\_\_\_\_ kg  
BMI: \_\_\_\_\_ kg/m<sup>2</sup> Stride length: \_\_\_\_\_ cm

### 2. History → Cancer diagnosis

---

---

### 3. Relevant diseases / symptoms that interfere / occur with physical activity

(e.g. still present diseases from the medical history)

**Cardiovascular system** (including risk factors such as high blood pressure):

---

---

**Respiratory system:**

---

---

**Musculoskeletal problems:**

---

---

**Surgeries, injuries (e.g. amputations):**

---



---

**4. Sport History**

**Type of sport, frequency, time, years, intensity:**

---



---



---



---



---



---



---



---

**5. Physical examination**

|                  | <b>Abnormal findings (please specify):</b> |
|------------------|--------------------------------------------|
| Eyes             |                                            |
| Ears/nose/throat |                                            |
| Lungs            |                                            |
| Heart / vessels  |                                            |
| Abdomen          |                                            |
| Skin             |                                            |
| Joints           |                                            |
| Back/spine       |                                            |
| Other            |                                            |

**Exam completed by:** \_\_\_\_\_

**6. Physical activity exclusions** (mark the activities the participant should **not** engage in)

- |                                               |                                                        |                                                     |
|-----------------------------------------------|--------------------------------------------------------|-----------------------------------------------------|
| <input type="checkbox"/> Swimming             | <input type="checkbox"/> Diving and jumping into water | <input type="checkbox"/> Aerobic exercise           |
| <input type="checkbox"/> Speed exercise       | <input type="checkbox"/> High impact exercise          | <input type="checkbox"/> Strength building exercise |
| <input type="checkbox"/> Flexibility exercise | <input type="checkbox"/> Contact sports                | <input type="checkbox"/> Adapted physical activity  |

**Further comments on physical activity exclusions / recommendations**

---

---

**7. Heart rate at 60% of peak oxygen uptake** (from Spiroergometry)

Heart rate at 60%  $VO_{2max}$ : \_\_\_\_\_ beats per minute

---

**Sources of information (respective REDCap Form)**

1. *Basic information* → *Vital signs, Anthropometry*
2. *Relevant diseases/ symptoms that interfere/ occur with physical activity* → *Extraction from medical record (e.g. amputations), Medical history, current clinical status (last 3 months)*
3. *Physical examination* → *Physical examination*
4. *Physical activity exclusion* → *Physical examination*
5. *Heart rate by 60%* → *Spiroergometry (calculation)*

**Aktivitätsinterview**

ID: \_\_\_\_\_

Datum: \_\_\_\_\_

Wenn Sie von einer typischen Woche ausgehen, wie viele Minuten pro Tag verbringen Sie mit den folgenden Aktivitäten? Bitte **intensive Aktivitäten** speziell markieren/hervorheben!

| Sportart                                         | Mo | Di | Mi | Do | Fr | Sa | So |
|--------------------------------------------------|----|----|----|----|----|----|----|
| Schulsport                                       |    |    |    |    |    |    |    |
| Fahrradfahren                                    |    |    |    |    |    |    |    |
| Sport im Verein (Welche Sportart?)               |    |    |    |    |    |    |    |
|                                                  |    |    |    |    |    |    |    |
|                                                  |    |    |    |    |    |    |    |
|                                                  |    |    |    |    |    |    |    |
|                                                  |    |    |    |    |    |    |    |
| Sport außerhalb eines Vereins (Welche Sportart?) |    |    |    |    |    |    |    |
|                                                  |    |    |    |    |    |    |    |
|                                                  |    |    |    |    |    |    |    |
|                                                  |    |    |    |    |    |    |    |
|                                                  |    |    |    |    |    |    |    |
| Sport mit Freunden/Familie (Was für Sport?)      |    |    |    |    |    |    |    |
|                                                  |    |    |    |    |    |    |    |
|                                                  |    |    |    |    |    |    |    |
|                                                  |    |    |    |    |    |    |    |

**Wichtig:** Diese Form ist nicht in REDCap verfügbar und dient als Hilfestellung zum Ausfüllen von Form C. Weiter dient es als Hilfe zur korrekten Erfassung des Formulars „Vigorous physical activity check“ in REDCap (Erfassung der intensiven körperlichen Aktivitäten für eine durchschnittliche Woche).

**Strukturierte Teilnehmerbefragung (Motivierendes Interview)  
der Teilnehmenden der Interventionsgruppe**

ID: \_\_\_\_\_

Datum: \_\_\_\_\_

**1. Wie möchten Sie sich bewegen?**

- a. mit Musik
- b. mit Ball
- c. joggend ohne spezielle Geräte
- d. Wasseraktivitäten
- e. Sport alleine (z.B. Yoga, Rad/Velo)
- f. Sport in einem Team
- g. Wettkampf orientiert
- h. Freizeit orientiert
- i. in der Natur
- j. Andere

Falls ANDERE, bitte spezifizieren:

\_\_\_\_\_

**2. Haben Sie schon eine / mehrere konkrete Idee(n)?**

\_\_\_\_\_  
\_\_\_\_\_  
\_\_\_\_\_

**3. Was könnte Sie daran hindern, Sport zu treiben?**

- a. Ungewohnte Umgebung oder fremde Menschen
- b. Körperliche Bedenken (zu hart, keine Kondition, Gewichtsverlust, Schmerzen)
- c. Es fühlt sich wie eine weitere Therapie an
- d. Schwierig Zeit zu finden, körperlich aktiv zu sein
- e. Wenn Sport nicht alleine: Bedenken, was Andere über mich denken
- f. Sport im Wasser, im Fitnesscenter, in der Gruppe: Problem mit dem eigenen Körperbild (Narben, Amputationen, Übergewicht, Grösse)
- g. Anderes:

Falls ANDERES, bitte spezifizieren:

---

**4. Wie können die Bedenken gemindert werden?**

- a. im Vorfeld mit Übungsleiter / Trainer sprechen
- b. Gruppe / Sportangebot erst einmal besuchen und ausprobieren, ohne sich verpflichten zu müssen
- c. Mehr Informationen über den Sport im Vorfeld
- d. Verminderte Zeit mit inaktiven Tätigkeiten (Integration der körperlichen Aktivität ins tägliche Leben)
- e. Die neuen Sportart zuerst mit einer vertrauten Person beginnen
- f. Anderes:

Falls ANDERES, bitte spezifizieren:

---

**5. Wie hoch ist die Wahrscheinlichkeit auf einer Skala von 0-10, dass Sie wirklich Bewegungs-, Trainings- und Sportaktivitäten aufnehmen?**

"10" bedeutet: auf jeden Fall immer, "0" bedeutet gar nicht

Gar nicht 

|   |   |   |   |   |   |   |   |   |   |    |
|---|---|---|---|---|---|---|---|---|---|----|
| 0 | 1 | 2 | 3 | 4 | 5 | 6 | 7 | 8 | 9 | 10 |
|---|---|---|---|---|---|---|---|---|---|----|

 Auf jeden Fall immer

**6. Wie hoch ist die Wahrscheinlichkeit auf einer Skala von 0-10, dass Sie die vorgesehenen Bewegungs-, Trainings- und Sportaktivitäten durchführen können?**

"10" bedeutet: auf jeden Fall immer, "0" bedeutet gar nicht

Gar nicht 

|   |   |   |   |   |   |   |   |   |   |    |
|---|---|---|---|---|---|---|---|---|---|----|
| 0 | 1 | 2 | 3 | 4 | 5 | 6 | 7 | 8 | 9 | 10 |
|---|---|---|---|---|---|---|---|---|---|----|

 Auf jeden Fall immer

**7. Was ist, falls Ihnen das Angebot nicht gefällt? Wenn Probleme auftauchen? Was tun Sie dagegen bzw. wie gehen Sie damit um?**

---

---

---

---

**Vereinbarung über die Durchführung körperlicher Aktivität und Sport**

Dieser „Vertrag“ soll Ihnen und dem Studienteam helfen, sich an alle Vereinbarungen zu erinnern

ID: \_\_\_\_\_ Datum: \_\_\_\_\_

**Folgende Maßnahmen wurden in Bezug auf das Projekt SURfit vereinbart:**

- Die Physiotherapeutinnen des UKBB bieten Ihnen regelmäßige Beratungen zur Steigerung der körperlichen und sportlichen Aktivität an. Zusätzlich stellen wir Ihnen einen Schrittzähler sowie ein Onlinetagebuch via Login unter [www.surfit.ch](http://www.surfit.ch) zur Verfügung.
- Ihre Physiotherapeutin wird sich bei Ihnen zwischen den Besuchen telefonisch melden, um Sie laufend zu beraten. In den ersten 6 Monaten findet dieser Anruf jeweils einmal pro Monat statt, danach alle zwei Monate.
- Sie verpflichten sich, im kommenden Jahr Ihre bisherige sportliche Aktivität von \_\_\_\_\_ Stunden pro Woche um mindestens 2.5 Stunden intensive körperliche Aktivität pro Woche zu steigern. Ihre intensive sportliche Aktivität pro Woche wird also insgesamt \_\_\_\_\_ Stunden betragen.
- Zusätzlich versuchen Sie inaktive Verhaltensweisen (z.B. Fernsehen, Computer etc.) um 25% zu reduzieren. Dies würde dann etwa einer Reduktion von \_\_\_\_\_ Stunden entsprechen.

**Folgende Aktivitäten sind geplant** (bitte Art der Aktivität und genaue Zeit eintragen):

|            | Morgen | Mittag | Abend |
|------------|--------|--------|-------|
| Montag     |        |        |       |
| Dienstag   |        |        |       |
| Mittwoch   |        |        |       |
| Donnerstag |        |        |       |
| Freitag    |        |        |       |
| Samstag    |        |        |       |
| Sonntag    |        |        |       |

**Ergänzungen zum Gespräch** (Zusammenfassungen, weitere Abmachungen etc.):

---

---

---

---

---

---

---

Sie haben zugestimmt, den Schrittzähler täglich zu tragen und Ihre Aktivitäten täglich, oder spätestens jeden dritten Tag in das Onlinetagebuch einzutragen. Falls dies einmal nicht möglich sein sollte, informieren Sie bitte Ihre Physiotherapeutin. Bitte beachten Sie, dass Sie selbst ausschließlich Daten der laufenden und vorangegangenen Woche im Tagebuch eingeben / ändern können. Sollte es Ihnen für einen längeren Zeitraum nicht möglich sein die Daten einzugeben, informieren Sie bitte Ihre Physiotherapeutin, welche die Daten rückwirkend für Sie eintragen kann.

Basierend auf Ihren Einträgen im Tagebuch werden Sie Rückmeldungen aus dem Studienteam erhalten.

Bei Fragen oder Problemen wenden Sie sich bitte an:

.....  
Physiotherapeutin

.....  
Telefon

.....  
E-Mail

.....  
Ort und Datum

.....  
Name Studienteilnehmer/in

.....  
Name Physiotherapeutin

.....  
Unterschrift Studienteilnehmer/in

.....  
Unterschrift Physiotherapeutin



# bewegung tut gut

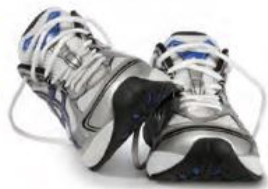

## Tipps für einen aktiven Lebensstil

Körperliche Aktivität kann helfen, mögliche Nebenwirkungen und Langzeitfolgen Ihrer früheren Krebstherapie zu reduzieren.

Mit SURfit 2.5 Stunden mehr intensive körperliche Aktivität pro Woche! Das sind 30 Minuten an 5 Tagen...

1

Ausdauertraining mehrmals pro Woche für 20-60 Minuten (insgesamt 2 Stunden pro Woche) steigert die Leistungsfähigkeit und reduziert das Risiko für chronische Krankheiten

2

Übungen für Kraft und Beweglichkeit, sowie Sprünge (insgesamt 30 Minuten pro Woche) erhalten die Funktionalität von Muskeln, Knochen und Gelenken

3

Jeden Tag Bewegung in Form von Alltagsaktivitäten / Abbau Inaktiver Zeit

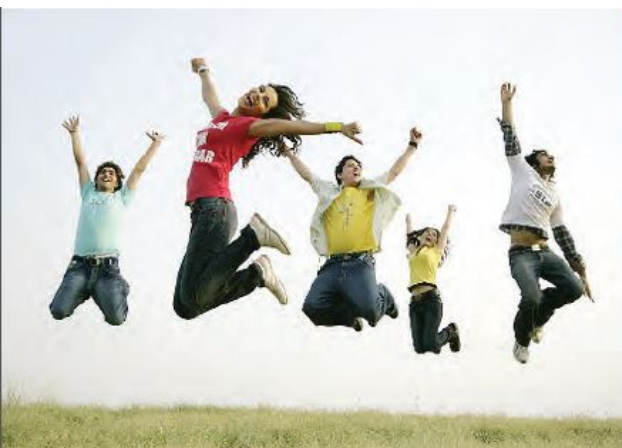

**Setze ein Ziel**

**Mach einen Plan**

**Jeder Schritt zählt**

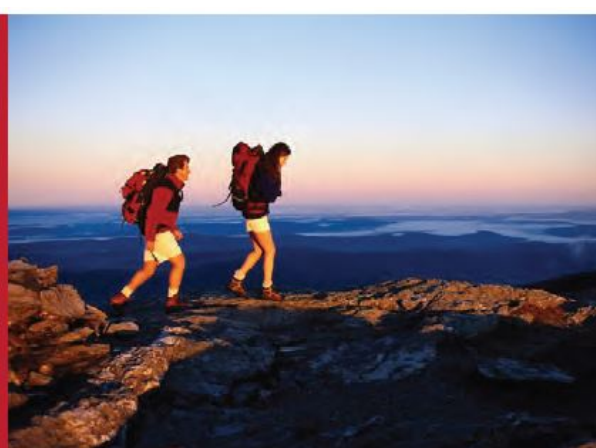

# So gehts leichter...

## Tipps für den Anfang

Waren Sie eine Zeitlang weniger aktiv? Kein Problem:

- Beginnen Sie langsam und setzen Sie realistische Ziele
- Fangen Sie mit Aktivitäten tiefer Intensität an
- Integrieren Sie regelmässige Bewegung in Ihren Alltag
- Versuchen Sie mit Familien und Freunden zusammen aktiv zu sein
- Wählen Sie Aktivitäten aus, die Ihnen Spass machen
- Schreiben Sie sich in einem Sportverein in Ihrer Nähe ein
- Jeder Mensch ist individuell, bewegen Sie sich so, wie es Ihnen passt.

1

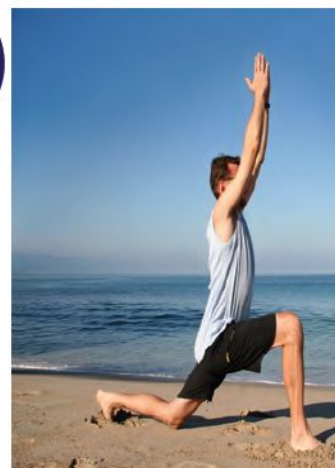

2

## Integrieren Sie Bewegung in Ihren Alltag

Das einfachste Rezept um regelmässig und langfristig aktiv zu bleiben:

- Fahren Sie mit dem Velo zur Arbeit
- Steigen mit dem Bus früher aus oder parkieren Sie weiter weg
- Staubsaugen, Fenster putzen und Gartenarbeit zählen auch
- Treffen Sie sich mit Freunden für einen Spaziergang oder eine Velofahrt
- Spielen Sie aktiv mit Ihren Kindern oder Haustieren
- Machen Sie bei der Arbeit kurze Bewegungspausen oder einen Spaziergang
- Stehen Sie auf zum Telefonieren
- Nehmen Sie die Treppen anstatt den Lift
- Spazieren Sie für eine Besprechung anstatt zu sitzen
- Organisieren Sie einen regelmässigen Sportabend mit Freunden oder Mitarbeitern

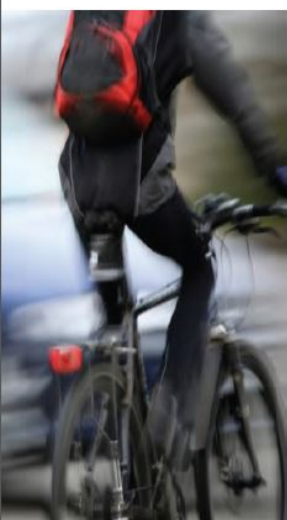

## Nutzen Sie moderne Technologien..

Es gibt viele Apps, die einem beim Sport treiben unterstützen und motivieren!

Runtastic; Endomondo; Adidas miCoach; UP; Nike running; Office-Fit; Alles-in-einem Yoga; Fitness Point; 7 Minuten Training; Daily Workouts Free; 5 Minuten Heimtraining; Get Set

## Was alles zählt

Körperliche Aktivität ist vielseitig. Jede Bewegung, die Sie ein bisschen ausser Atem bringt, Ihre Muskeln dehnt und stärkt oder die Gelenke durchbewegt, zählt. Zum Beispiel:

Individuelle Übungen zuhause, Velofahren, Spazieren, Haus- und Gartenarbeit, Treppensteigen, Fitnesscenter, Tanzen, Schwimmen, Ballspiele, Wandern, mit Kindern spielen, mit dem Hund spazieren, etc. Finden Sie diese Bewegungen, die Ihnen Spass machen, aber versuchen Sie möglichst vielseitig aktiv zu sein.

Wo finden Sie weitere Informationen über Sportangebote in der Region Basel?

[www.sportbasel.ch](http://www.sportbasel.ch); <http://portalbasel.ch>; [www.sport.bs.ch](http://www.sport.bs.ch); [www.baselland.ch/sportamt](http://www.baselland.ch/sportamt)

Wo finden Sie weitere Informationen und Ideen für einen aktiven Lebensstil?

[www.baspo.ch](http://www.baspo.ch); [www.hepa.ch](http://www.hepa.ch); [www.gesundheitsfoerderung.ch](http://www.gesundheitsfoerderung.ch); [www.haltungsbewegung.de](http://www.haltungsbewegung.de)

# Und hier noch ein paar Übungen von uns für jeden Tag...

Auf den folgenden Seiten finden Sie ein Trainingsmanual mit Übungen zur Kräftigung der großen Muskelgruppen mit und ohne Geräte. Zudem haben wir Sprungübungen integriert, die speziell die Knochen stärken. Sie finden zu jeder Übung eine kurze Anleitung und Hinweise zur Übungsausführung. Falls Sie Fragen zu den Übungen haben, wenden Sie sich bitte an Ihre Physiotherapeutin. Wir empfehlen die Übungen vorab mit Ihrer SURfit Physiotherapeutin zu besprechen.

## 1. Allgemeine Hinweise zum Krafttraining

Das Ziel der SURfit Studie ist es Ihre intensiven körperlichen Aktivitäten um 2.5 Stunden pro Woche oder 30 min an 5 Tagen zu erhöhen. Davon sollten Sie wenigstens 30 Minuten pro Woche für ein Krafttraining einplanen. Nur ein trainierter Muskel kann auch eine Ausdauerleistung vollbringen!

**Wichtige Hinweise zum Krafttraining:**

- Achten Sie bei den Übungen stets auf eine korrekte Ausführung! Hierbei kann es hilfreich sein die Übungen vor einem Spiegel oder mit einem Freund / einer Freundin auszuführen.
- Führen Sie die Übungen langsam und ohne Schwung aus!
- Achten Sie auf Ihre Atmung: Während der Anstrengung ausatmen (*Anstrengung=Ausatmen*) und während der Entlastung einatmen (*Entlastung=Einatmen*). Halten Sie nicht die Luft an!
- Versuchen Sie stets den Anstrengungsgrad der Übungen zu steigern und erhöhen Sie schrittweise die Anzahl der Wiederholungen, den Schwierigkeitsgrad sowie den Widerstand/das Gewicht.

**Besprechen Sie die Übungen mit Ihrer Physiotherapeutin und lassen Sie sich regelmäßig Tipps für Steigerungsmöglichkeiten geben!**

## 2. Aufwärmübungen

Vor Beginn des Krafttrainings sollten Sie sich wenigstens 5-10 Minuten aufwärmen, um den Kreislauf in Schwung zu bringen und die Durchblutung der Muskulatur zu erhöhen. Damit vermindern Sie einerseits das Risiko für Muskelverletzungen und andererseits ist das Training effektiver.

Zum Aufwärmen eignen sind:

- Seilspringen, Hampelmann
- Stepübungen (Treppen rauf und runter gehen)
- Hock-Streck Sprünge
- Armkreisen, Hüftkreisen
- Handgelenke kreisen
- Aerobic, Boxübungen mit jeglichen Variationen
- Lockerer Dauerlauf, rasches Gehen
- Fahrradergometer oder Crosstrainer

**Versuchen Sie jeweils die Muskeln des Ober- und Unterkörpers aufzuwärmen!**

### 3. Kraftübungen ohne Geräte

Es werden Übungen mit verschiedenen Schwierigkeitsgraden dargestellt. Achten Sie stets darauf, dass Sie die Übung langsam und korrekt auszuführen.

#### 3.1. Rumpf-, Schulter- und Brustmuskulatur

##### Rumpfmuskulatur

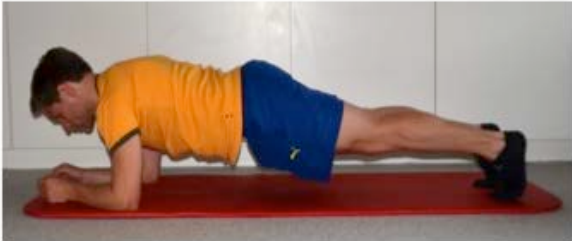

##### Ausgangstellung

Unterarmstütz; Arme parallel; Rücken gerade; Rumpf und Beine gestreckt (auch auf Knien möglich).

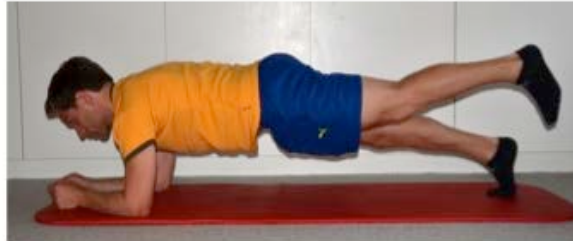

##### Ausführung

Langsames, wechselseitiges Abheben der Füße um Schuhlänge bei gestreckten Knien.

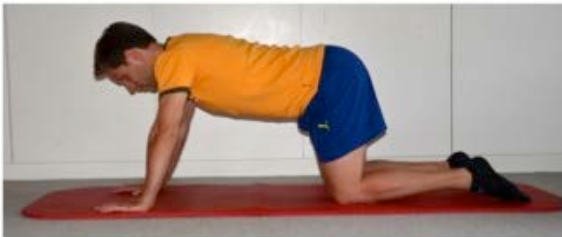

##### Ausgangstellung

Bankstellung; Rücken gerade; Arme auf Schulterhöhe und gestreckt.

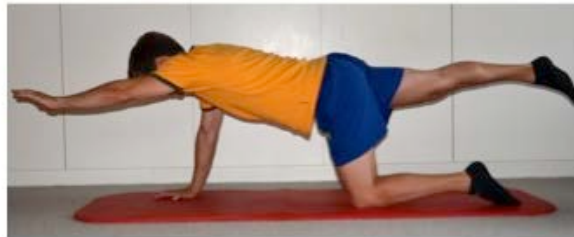

##### Ausführung

Arme und Beine gegenseitig strecken. Stellung von Becken und Schultergürtel werden während Bewegung nicht verändert.

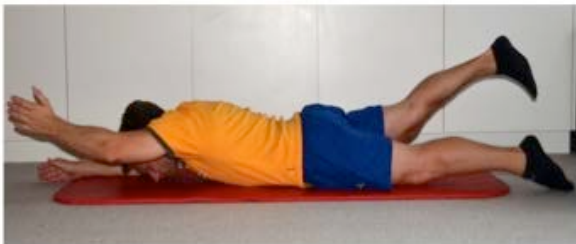

##### Ausführung

Bauchlage, Arme und Beine sind gestreckt. Arme und Beine langsam wechselseitig abheben. Kopf dabei nicht überstrecken, auf Atmung achten – die Luft nicht anhalten.

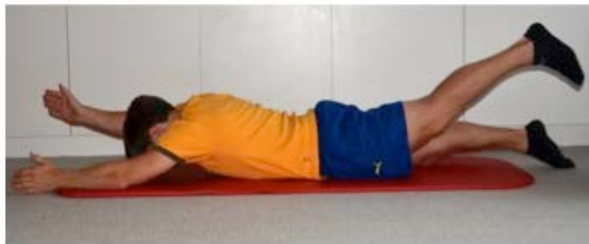

## Liegestütz auf Knien

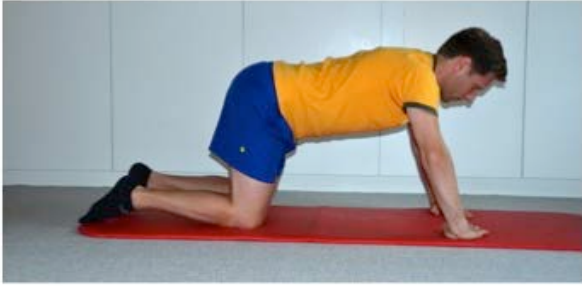

### Ausgangstellung

Bankstellung; Arme auf Schulterhöhe gestreckt; Rücken gerade

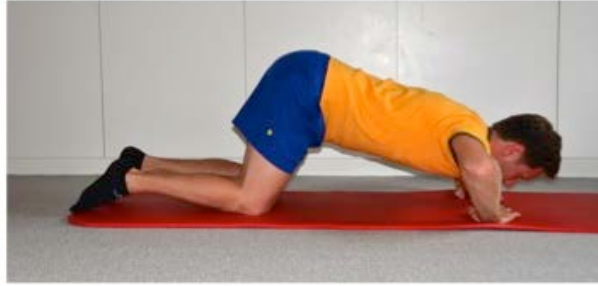

### Ausführung

Mit geradem Rücken langsam in die Liegestützposition gehen.

## Liegestütz

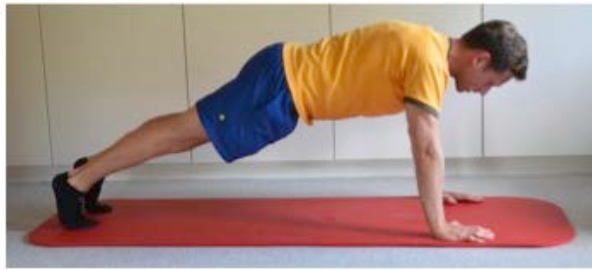

### Ausgangstellung

Arme und Beine sind gestreckt. Der Rücken ist gerade und das Gesäß ist angespannt.

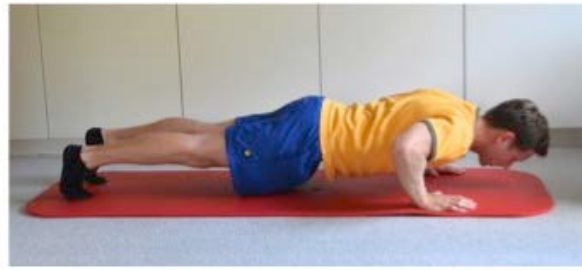

### Ausführung

Langsam in die Liegestützposition gehen. Der Rücken bleibt gerade. Den Atem nicht anhalten.

## Liegestütz rückwärts (Trizepsmuskulatur)

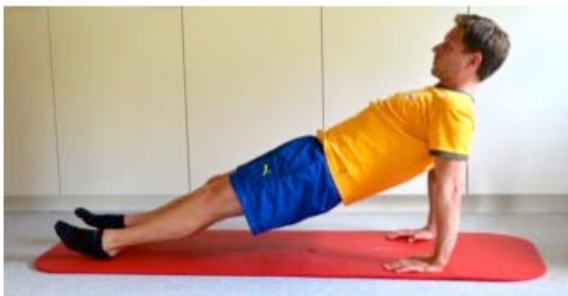

### Ausgangstellung

Beine und Arme sind gestreckt. Becken und Rücken bilden eine Gerade.

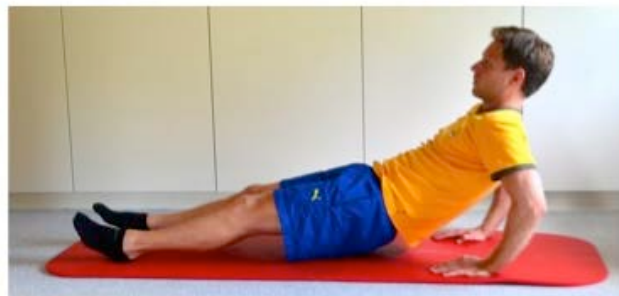

### Ausführung

Arme langsam beugen und anschließend wieder strecken und Ausgangsposition einnehmen. Den Atem nicht anhalten!

## 3.2. Bauchmuskulatur

### Seitliche Bauch- und Rumpfmuskulatur

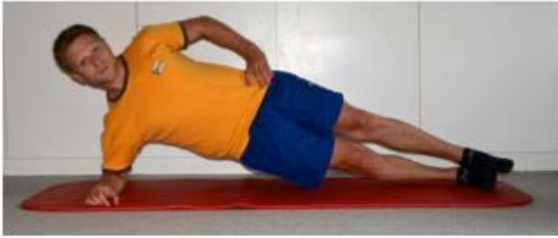

#### Ausgangstellung

Seitenlage, Körpergewicht ist auf Unterarm;  
Becken gerade, Gesäß angespannt.

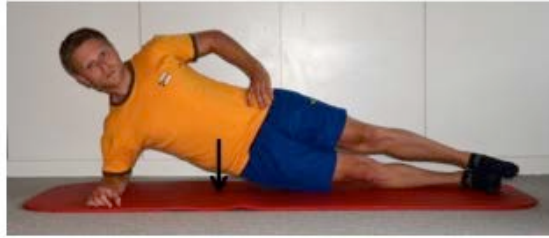

#### Ausführung

Becken und Rumpf langsam Richtung Boden absenken; Körperspannung halten; anschließend in Ausgangsposition zurück.

### Gerade Bauchmuskulatur

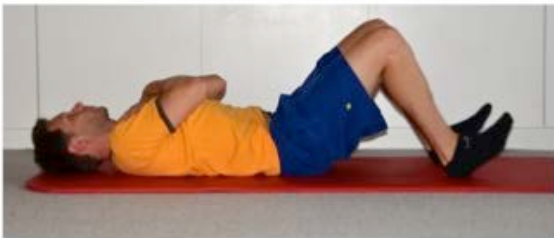

#### Ausgangstellung

Rückenlage; Arme sind auf Oberkörper verschränkt; Bein sind aufgestellt; Fußspitzen zeigen nach oben

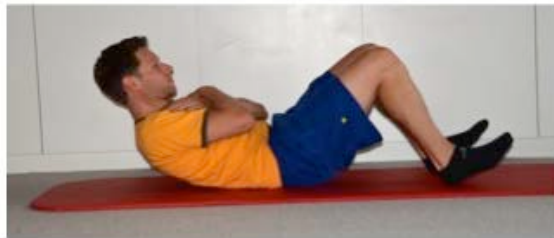

#### Ausführung

Oberkörper langsam aufrichten (ausatmen); Position kurz halten; Oberkörper wieder absenken (einatmen); Rücken nicht vollständig auf der Gymnastikmatte ablegen!

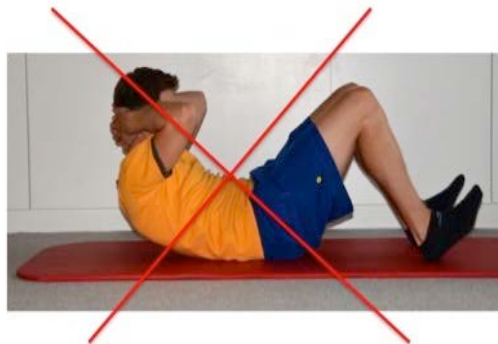

#### Achtung!

Bei dieser Übung sollten Sie nicht die Hände hinter dem Hals verschränken und die Übung mit Schwung ausführen!

### Seitliche Bauchmuskulatur (schwierig)

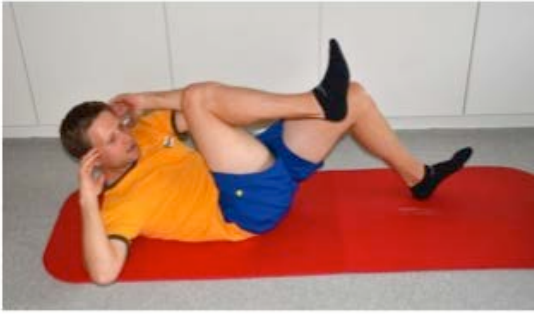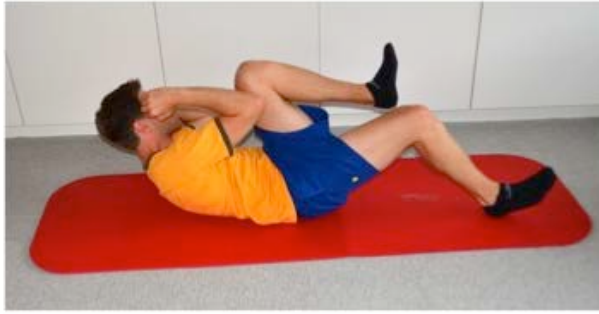

#### Ausführung

Rückenlage, die Hände sind an der Schläfe platziert. Wechselseitig den Ellenbogen zum Knie des gegenseitigen Beines führen. Das passive Bein ist aufgestellt.

### Seitliche Bauchmuskulatur (schwierig)

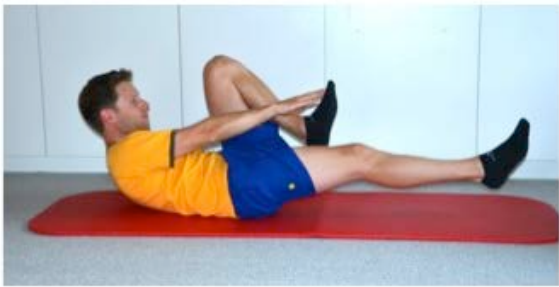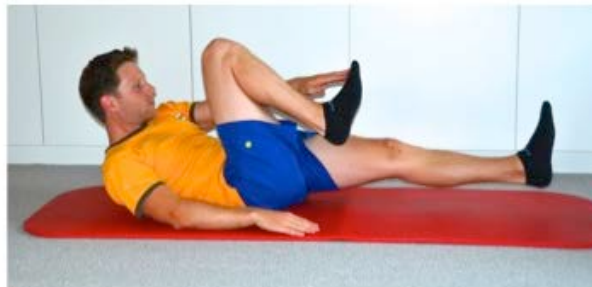

#### Ausführung

Wechselseitig den gestreckten Arm zur Fußspitze des gegenseitigen Beines führen. Das gestreckte ‚passive‘ Bein wird nicht am Boden abgelegt.

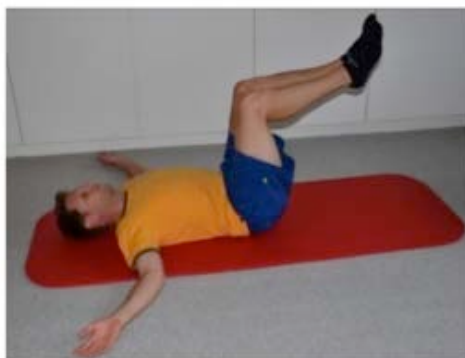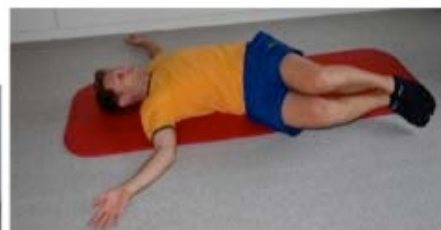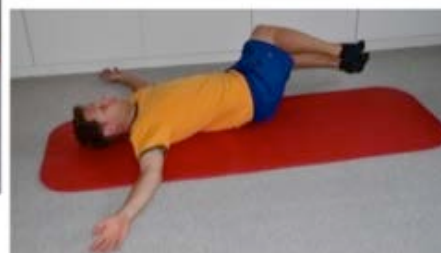

#### Ausgangstellung

Rückenlage; Arme auf Schulterhöhe neben dem Körper gestreckt; Beine sind in der Luft angewinkelt.

#### Ausführung

Das Becken wechselseitig zur Seite ‚kippen‘. Die Beine werden nicht vollständig am Boden abgelegt.

### 3.3. Beinmuskulatur

#### Kniebeuge

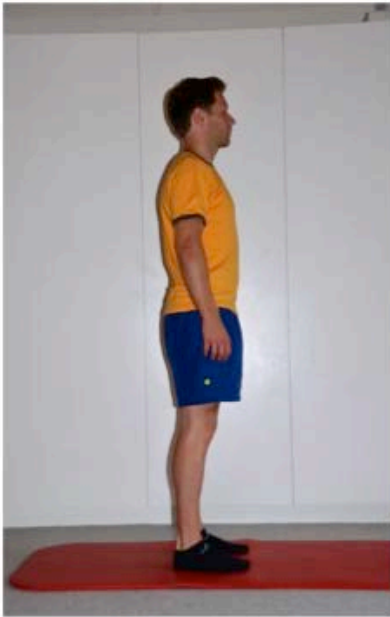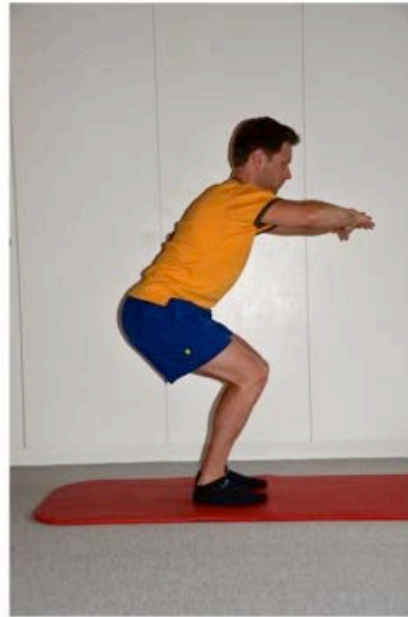

#### Ausführung

Hände auf Schulterhöhe vor dem Körper zusammenführen. Langsam und mit geradem Rücken in die Kniebeugeposition gehen und Position kurz halten (bis 90 Grad Kniewinkel). Die Knie sollten nicht über die Fußspitze zeigen. Mögliche Variation mit Zusatzgewicht (z.B. Hantel mit gestreckten Armen neben dem Körper).

#### Kniebeuge, statisch

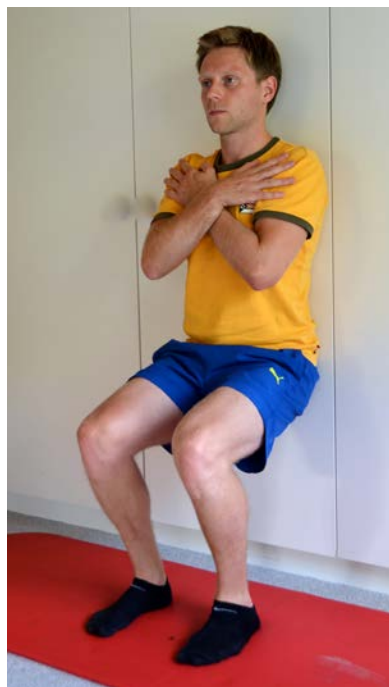

#### Ausführung

Der Rücken ist an die Wand gelehnt; Knie im rechten Winkel; Füße hüftbreit aufgestellt; Arme vor Oberkörper verschränkt; Position wird zwischen 20-60 Sekunden gehalten (je nach Trainingszustand). Die Übung mehrmals wiederholen.



## Kniebeuge, einbeinig

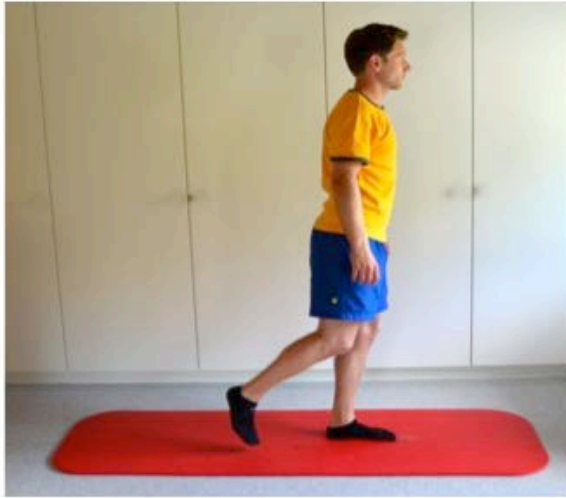

### Ausgangstellung

Aufrechte Position im Einbeinstand;  
Balance herstellen.

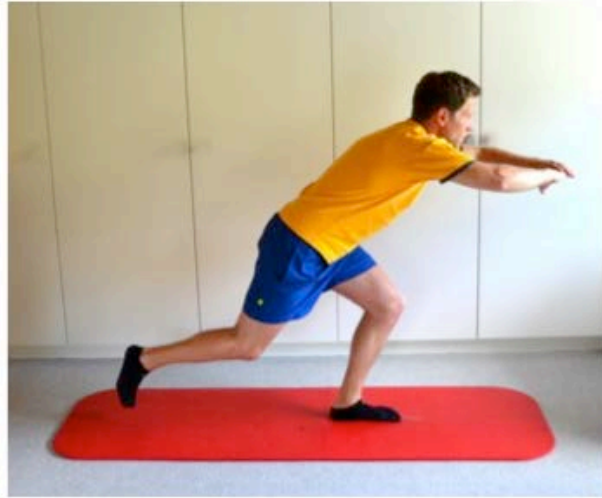

### Ausführung

Langsam das Bein beugen; Rücken bleibt gerade; Arme sind vor dem Körper verschränkt; Balance beibehalten.

## Ausfallschritt

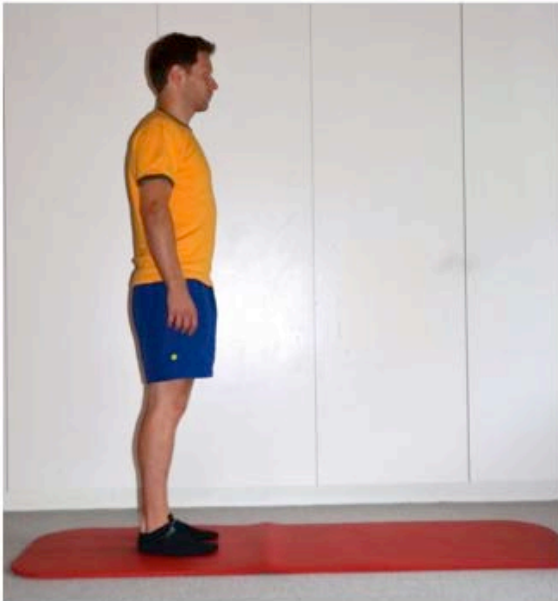

### Ausgangstellung

Aufrechte Position; Beine hüftbreit positioniert

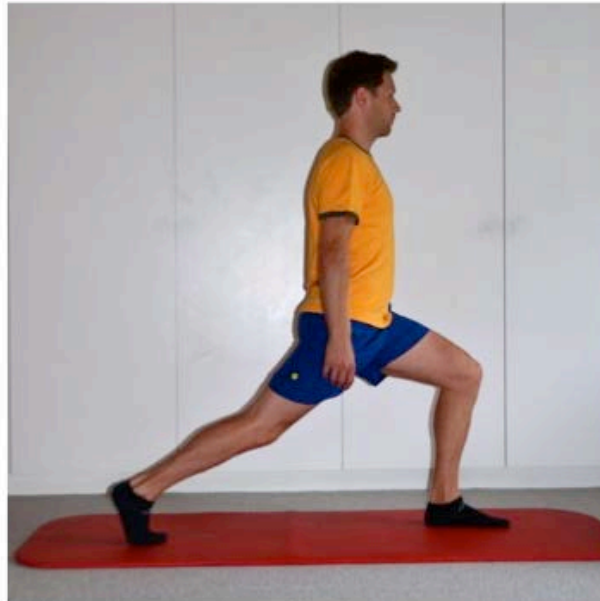

### Ausführung

Wechselseitig den Ausfallschritt ausführen;  
Gewicht auf vorderes Bein verlagern; Rücken bleibt gerade. Gleichgewicht beibehalten.  
Mögliche Variation: mit Zusatzgewicht (Hanteln).

## Wadenmuskulatur

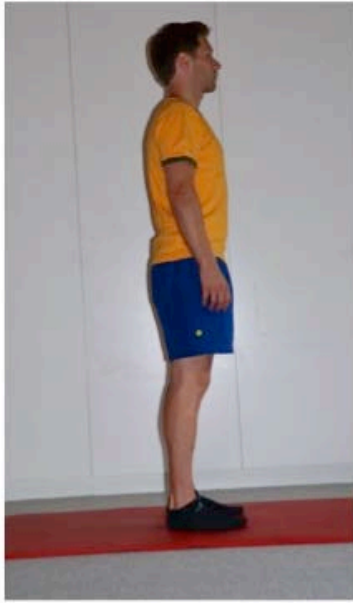

**Ausgangstellung**  
Aufrechte Position; Beine hüftbreit positioniert.

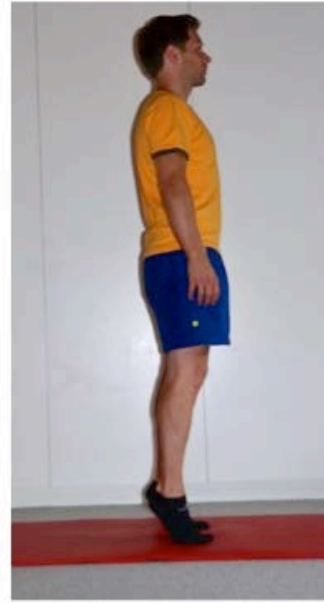

**Ausführung**  
Gewicht auf Zehenspitzen verlagern und nach oben drücken. Variation mit Zusatzgewicht (Hantel).

## 3.4. Beinmuskulatur und Stärkung des Knochens

### Sprung, beidbeinig über Hindernis

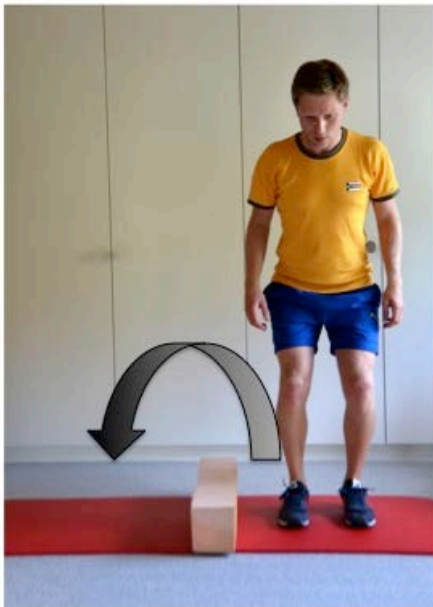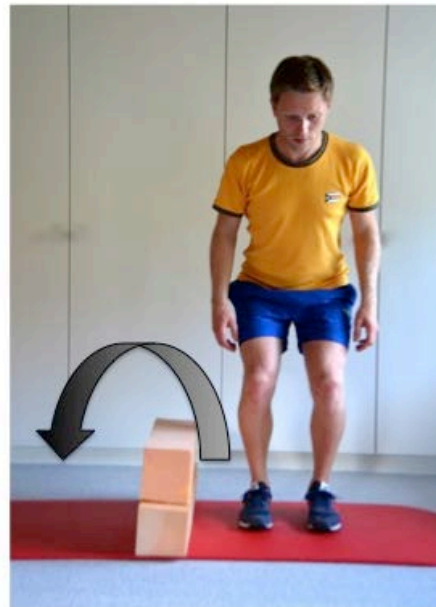

**Ausführung**  
Hüftbreit stehen; Arme sind neben dem Körper; Beine leicht gebeugt; seitlich über Hindernis springen; beidbeinig landen. Mögliche Variation durch unterschiedliche Höhe des Hindernisses.

## Sprung, beidbeinig von Kiste

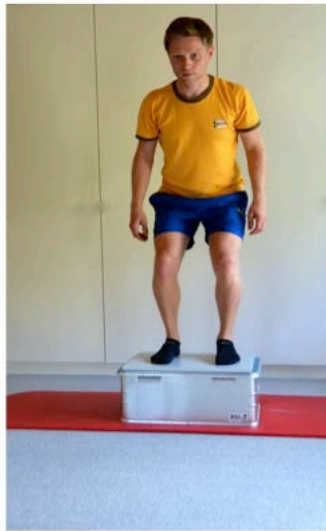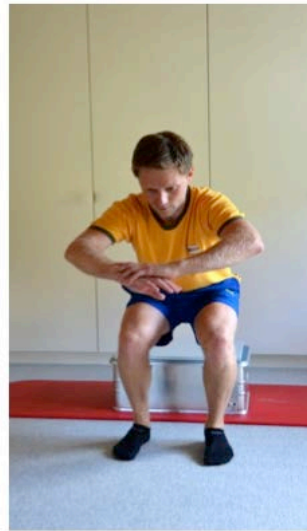

### Ausführung

Hüftbreit stehen; Arme sind neben dem Körper; Beine leicht gebeugt; Sprung vorwärts; beidbeinig landen. Arme als Balancehilfe vor dem Körper. Mögliche Variation durch unterschiedliche Höhe des Hindernisses.

## Sprung, beidbeinig über Hindernis

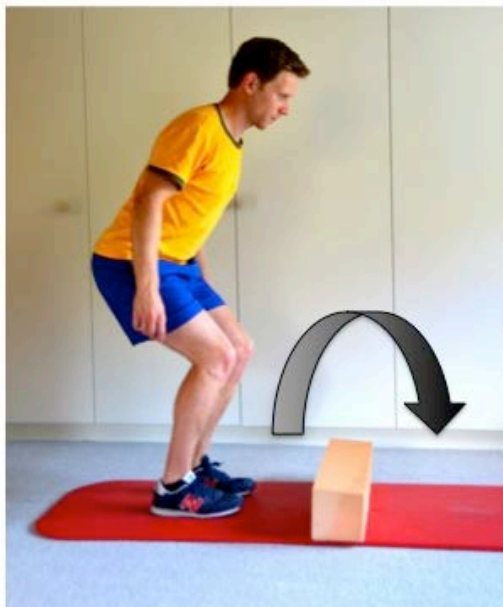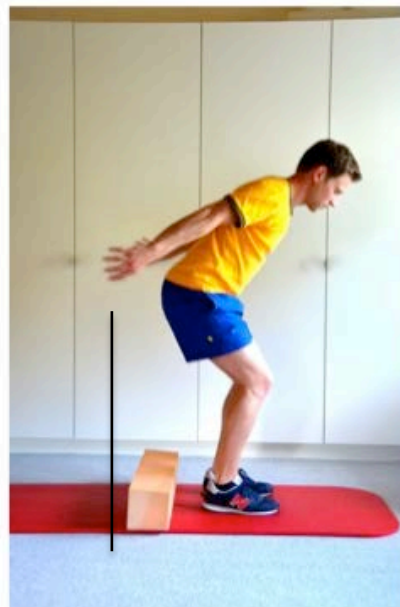

### Ausführung

Hüftbreit stehen; Arme sind neben dem Körper; Beine leicht gebeugt; Sprung vorwärts; beidbeinig landen. Knie sollten nicht über Fußspitze zeigen! Mögliche Variation durch unterschiedliche Höhe des Hindernisses.

## Sprung, einbeinig über Hindernis

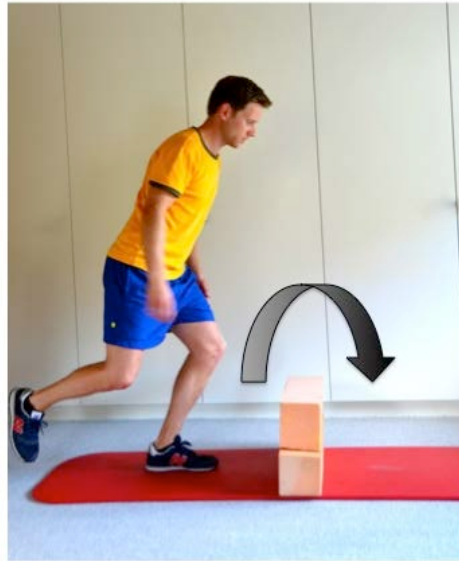

### Ausführung

Das Körpergewicht ist auf dem vorderen Bein; Gleichgewicht suchen; die Arme sind neben dem Körper; Sprung über Hindernis; einbeinig landen. Mögliche Variation durch Höhenveränderung des Hindernisses.

## Sprünge beidbeinig (Treppen)

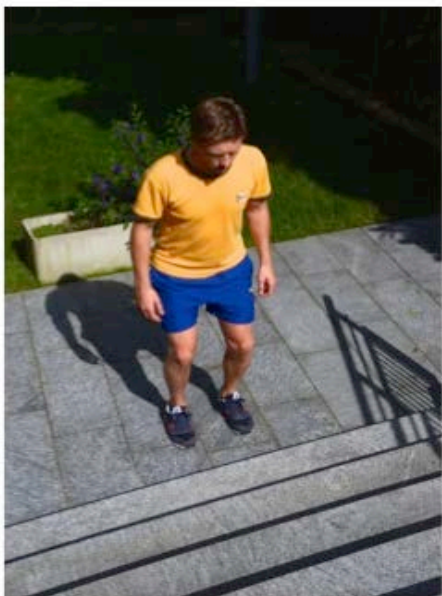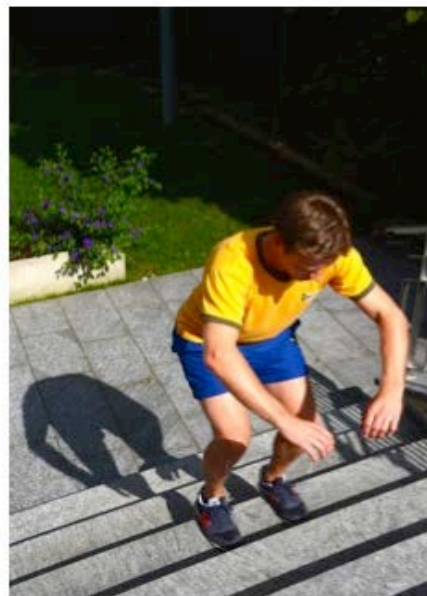

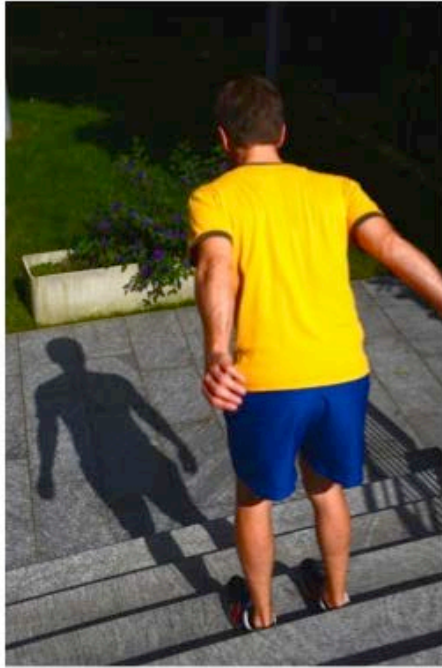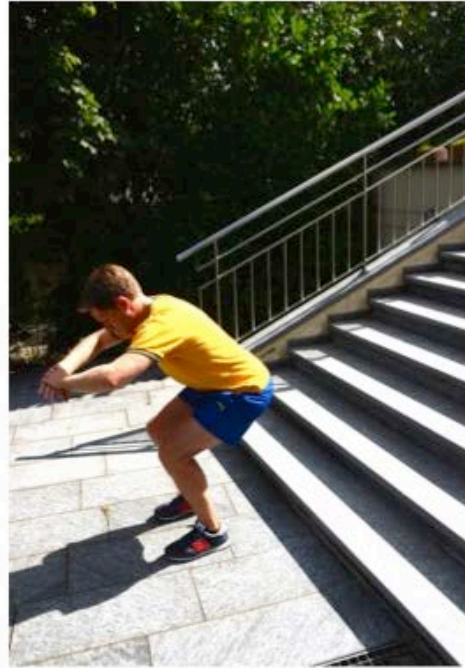

### **Ausführung**

Beidbeinige Sprünge die Treppe rauf und runter. Fokussieren Sie auf die Landung. Hüftbreite Position und gerader Rücken. Arme brauchen als Balancehilfe. Mögliche Variation durch springen über mehrere Stufen.

### **Sprünge einbeinig (Treppe aufwärts)**

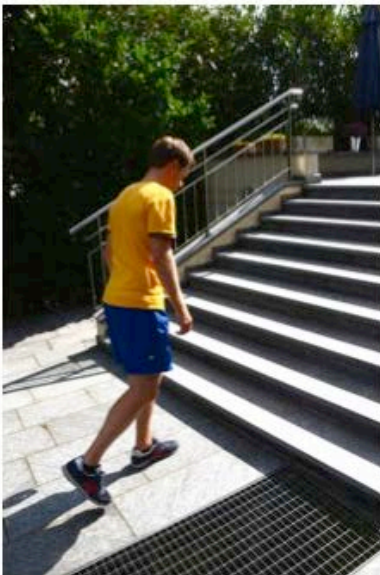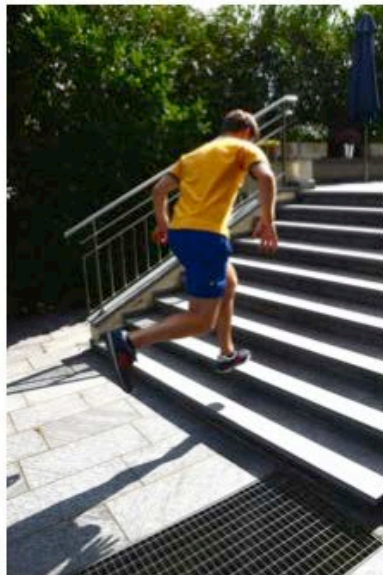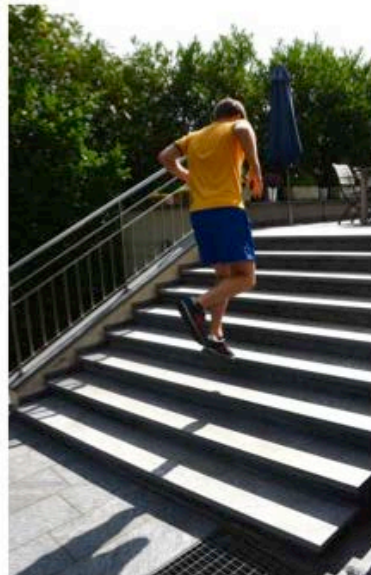

### **Ausführung**

Einbeinige Sprünge die Treppe rauf und runter. Körper sollte in Achse bleiben (Fuss-Knie-Hüfte-Rücken bilden eine Linie) – vermeiden Sie Ausweichbewegungen nach links oder rechts. Mögliche Variation durch Sprünge über mehrere Stufen.

## 4. Kraftübungen mit Geräten (Widerstandsband und Hanteln)

### 4.1. Informationen zum Widerstandsband

Das Widerstandsband (z.B. TheraBand™) ist ein ideales Trainingsgerät für zu Hause und auf Reisen, da es in jede Tasche passt. Es ist in verschiedenen Farben erhältlich; je nach Farbe ist der Widerstand stärker oder leichter. Die Abbildung zeigt die verschiedenen Farben und den jeweiligen Widerstand (in kg) sowie die Dehnungsfähigkeit (in %). Die Wahl der Farbe des Bands und damit der richtigen Bandstärke richtet sich nach dem individuellen Trainingszustand. Bevor Sie mit verschiedenen Farben trainieren, sollten die Übungen locker und technisch einwandfrei mit dem blauen Band 15-20 Mal durchgeführt werden können. Generell ist das Band so zu wählen, dass eine Übung am Anfang etwa 15 Mal wiederholt werden kann. Die schwarzen, silbernen und goldenen Bänder sind für Fortgeschrittene und sollten erst bei technisch korrekter Ausführung der Übungen gewählt werden.

|              |       | Widerstand in kg |     |      |      |         |        |      |
|--------------|-------|------------------|-----|------|------|---------|--------|------|
|              |       | Gelb             | Rot | Grün | Blau | Schwarz | Silber | Gold |
| Dehnung in % | 25 %  | 0,5              | 0,7 | 0,9  | 1,3  | 1,6     | 2,3    | 3,6  |
|              | 50 %  | 0,8              | 1,2 | 1,5  | 2,1  | 2,9     | 3,9    | 6,3  |
|              | 75 %  | 1,1              | 1,5 | 1,9  | 2,7  | 3,7     | 5,0    | 8,2  |
|              | 100 % | 1,3              | 1,8 | 2,3  | 3,2  | 4,4     | 6,0    | 9,8  |
|              | 125 % | 1,5              | 2,0 | 2,6  | 3,7  | 5,0     | 6,9    | 11,2 |
|              | 150 % | 1,8              | 2,2 | 3,0  | 4,1  | 5,6     | 7,8    | 12,5 |
|              | 175 % | 2,0              | 2,5 | 3,3  | 4,6  | 6,1     | 8,6    | 13,8 |
|              | 200 % | 2,2              | 2,7 | 3,6  | 5,0  | 6,7     | 9,5    | 15,2 |
|              | 225 % | 2,4              | 2,9 | 4,0  | 5,5  | 7,4     | 10,5   | 16,6 |
| 250 %        | 2,6   | 3,2              | 4,4 | 6,0  | 8,0  | 11,5    | 18,2   |      |

Das Übungsband wird immer doppelt um die Hand bzw. den Fuß gewickelt. Somit wird ein Abrutschen verhindert und die Verletzungsgefahr gemindert.

Das Band kann einseitig (Bild links) oder zweiseitig (Bild rechts) um die Hand gewickelt werden. In der Ausgangsposition sollte das Band jeweils unter leichter Spannung stehen.

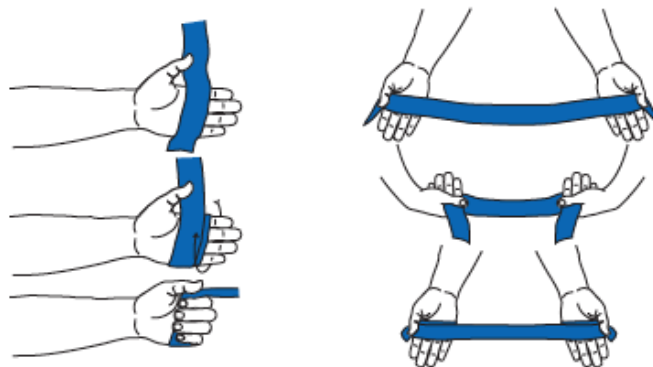

## 4.2. Schulter-, Rumpf- und Armmuskulatur mit dem TeraBand

### Schultermuskulatur

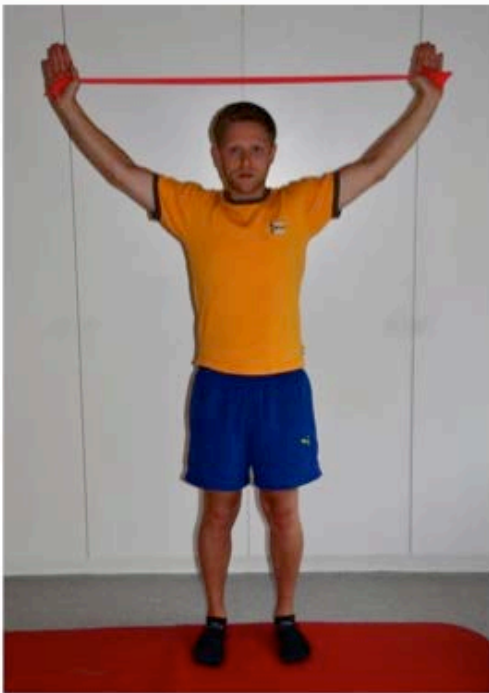

#### Ausgangstellung

Hüftbreit stehen; Arme über Kopf positionieren; das Band unter Spannung.

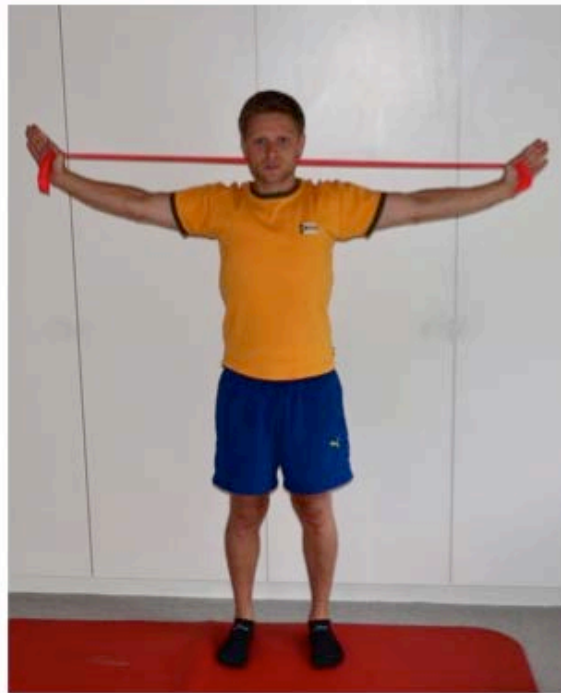

#### Ausführung

Das Band zur bis auf Schulterhöhe ziehen, kurz halten, anschließend in Ausgangsposition zurückbringen. Das Band ist immer unter Spannung!

### Schultermuskulatur

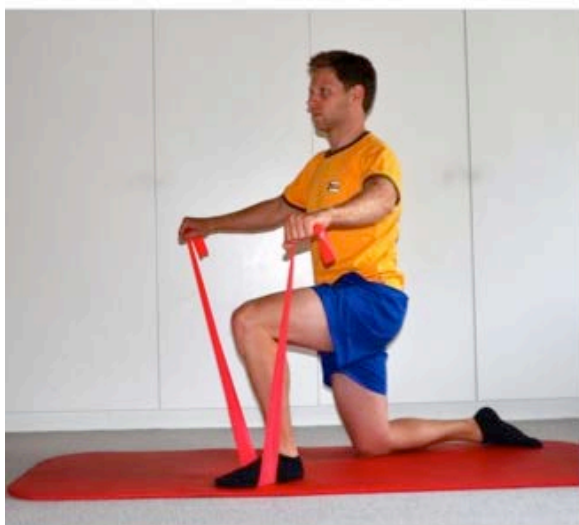

#### Ausgangsposition

Ein Bein aufgestellt; Arme horizontal auf Brusthöhe mit leicht angewinkelten Ellbogen; Rücken gerade; Band unter Spannung; Handgelenke gerade

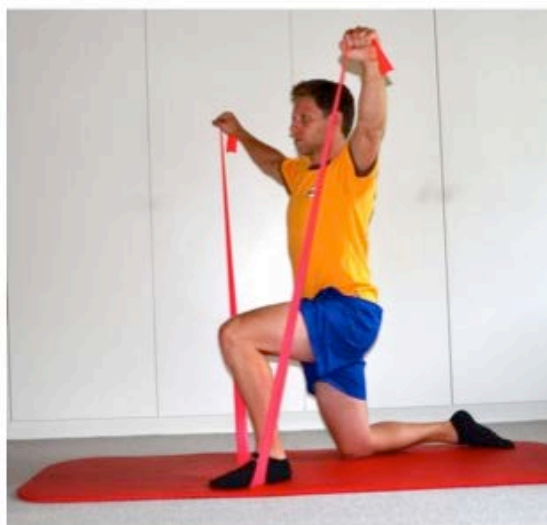

#### Ausführung

Band langsam Richtung Decke ziehen; kurz halten, anschließend wieder in die Ausgangsposition; Spannung halten.

## Schultermuskulatur (einarmig)

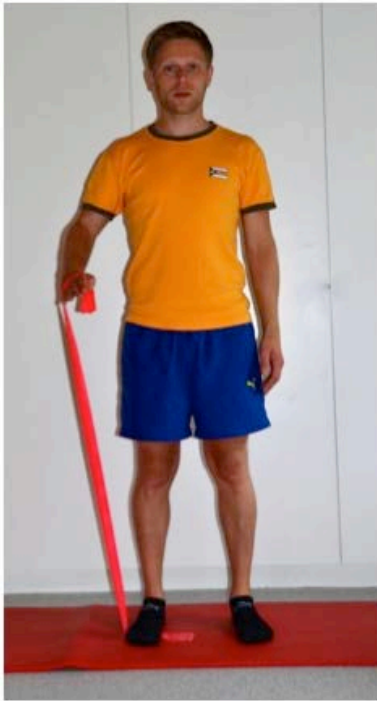

**Ausgangsposition**  
Hüftbreit stehen; Band unter Fuß geklemmt und unter Spannung; Handgelenke gerade.

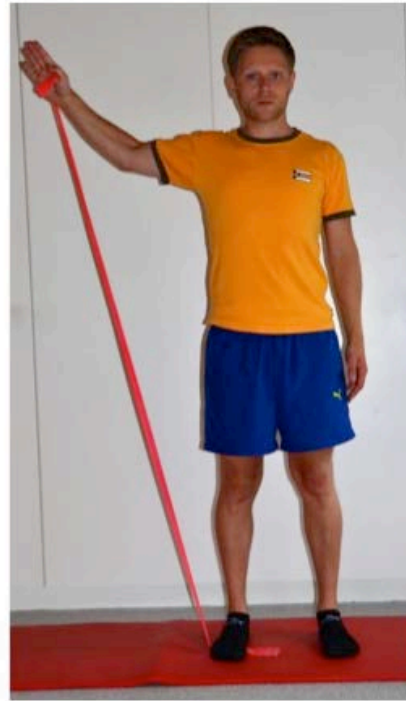

**Ausführung**  
Der Arm zieht das Band seitlich nach oben. Langsame Bewegungsausführung; zurück in Ausgangsposition.

## Schultermuskulatur

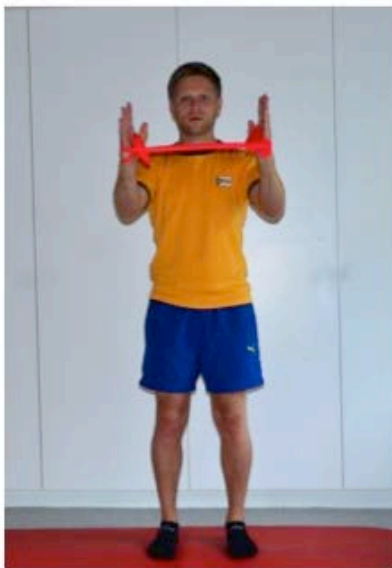

**Ausgangsposition**  
Band straff um die Hände gewickelt; Arme leicht gebeugt und in Vorhalte; Handinnenflächen zeigen zueinander.

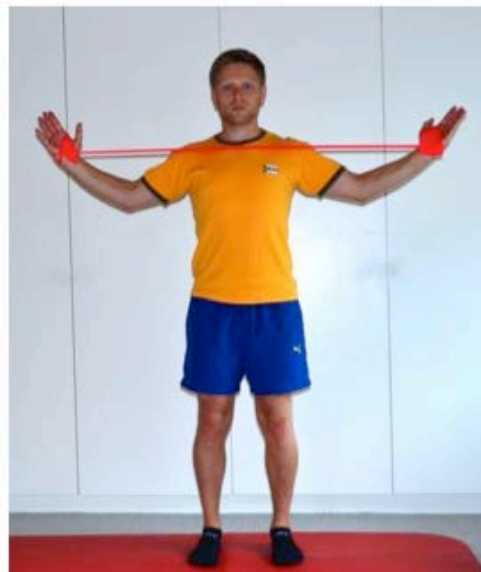

**Ausführung**  
Band langsam und kontrolliert auseinanderziehen (ausatmen) und zurück in Ausgangsposition (einatmen).



## Bizepsmuskulatur

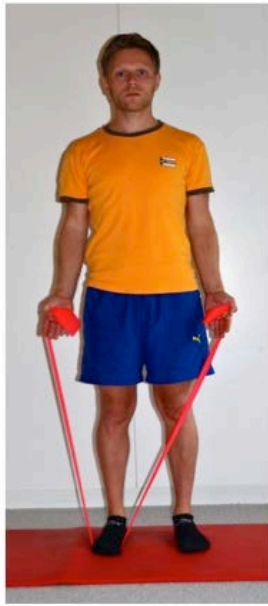

**Ausgangsposition**  
Band unter Fuß geklemmt; Arme in Vorhalte, Handinnenflächen zeigen nach oben.

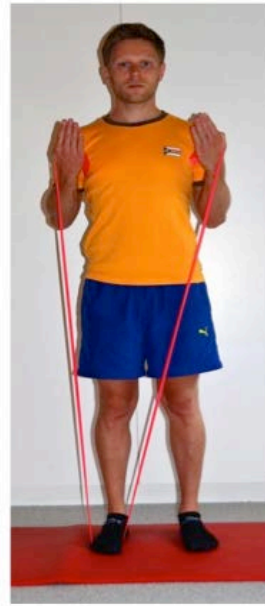

**Ausführung**  
Arme zum Körper heranziehen durch Beugen der Ellbogen; langsam zurück in Ausgangsposition; Spannung halten.

## Trizepsmuskulatur

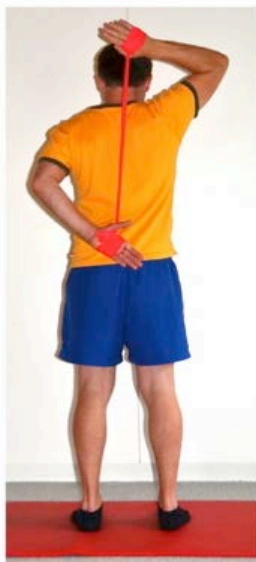

**Ausgangsposition**  
Band gut um die Hände wickeln; eine Hand ist auf Kopfhöhe, die andere etwa auf Höhe Lendenwirbelsäule; das Band ist unter Spannung.

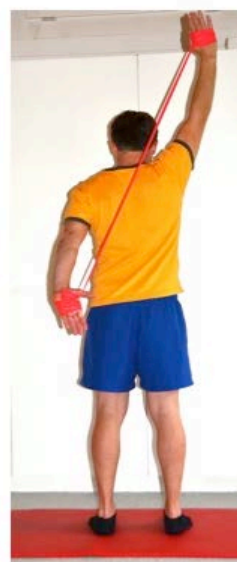

**Ausführung**  
Hände ziehen in die gegenseitige Richtung nach oben bzw. nach unten durch Strecken der Ellbogen. Langsame Bewegungs-ausführung, Spannung kurz halten und zurück in Ausgangsposition.

## Rückenmuskulatur

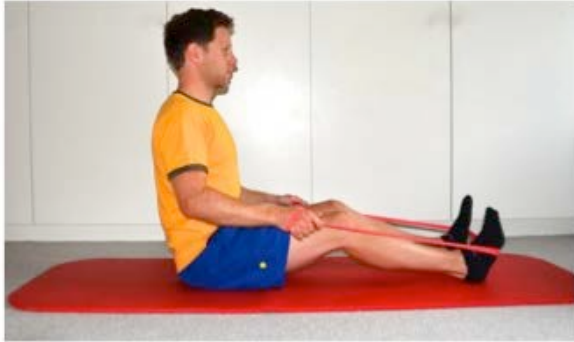

### Ausgangsposition

Sitzen mit geradem Rücken und nicht ganz durchgestreckten Beinen; Handflächen zeigen nach innen; Band unter Spannung.

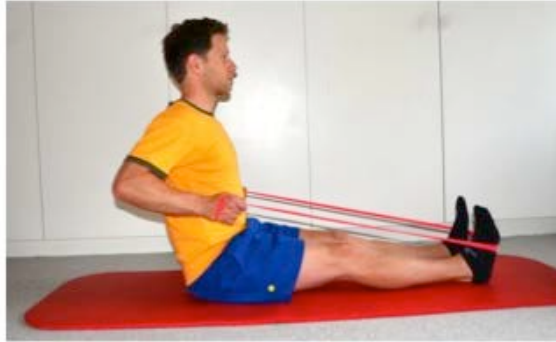

### Ausführung

Hände zum Körper heranziehen und Ellbogen soweit nach hinten wie möglich; dabei ausatmen. Schulterblätter nähern sich einander an. Langsam zurück in die Ausgangsposition (ausatmen).

## 4.3. Beinmuskulatur mit dem TeraBand

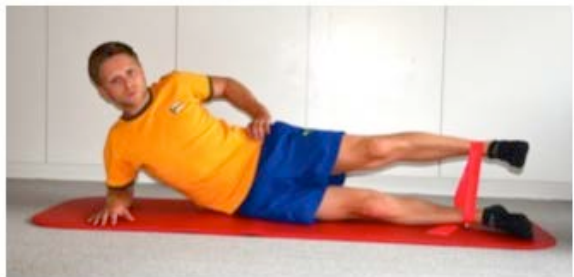

### Ausgangsposition

Seitenlage auf Arm gestützt; das Band straff um Beine oberhalb der Knöchel platziert.

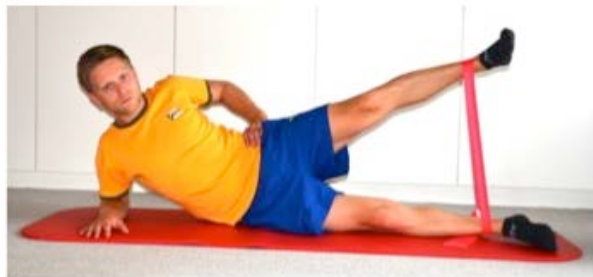

### Ausführung

Das obere Bein Richtung Decke ziehen (ausatmen); kurz halten und wieder zurück in die Ausgangsposition (einatmen).

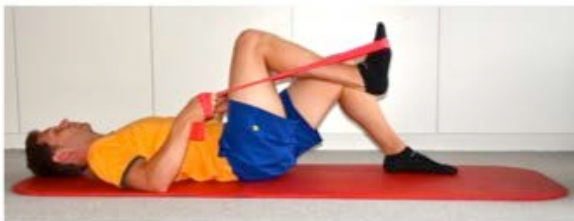

### Ausgangsposition

Rückenlage mit passivem Bein aufgestellt; Band um den Fuß des gebeugten Übungsbeines legen.

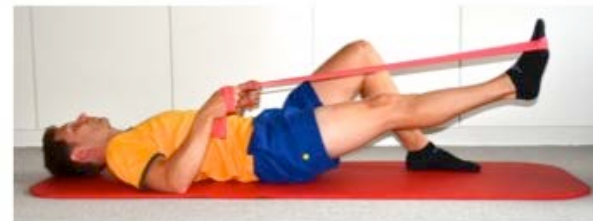

### Ausführung

Das Übungsbein strecken und dabei das Band unter Spannung halten. Die Armposition verändert sich dabei nicht.

#### 4.4. Informationen zu Kleinhanteln

Mit den Kleinhanteln können Sie fast alle Muskelgruppen trainieren. Wählen Sie das Gewicht zu Beginn so, dass Sie die jeweilige Übung langsam und korrekt mindestens 15x ausführen können. Machen Sie zwischen den Übungssets mit 15 Wiederholungen jeweils eine Pause von 45-60s und wiederholen Sie die Übungssets 3 Mal. Sie werden merken, dass es nicht viel Gewicht benötigt, um den Muskel bei korrekter, langsamer Ausführung zur Ermüdung zu bringen.

#### 4.5. Rumpf-, Schulter-, und Armmuskulatur mit Kleinhanteln

##### Schulter- und Armmuskulatur

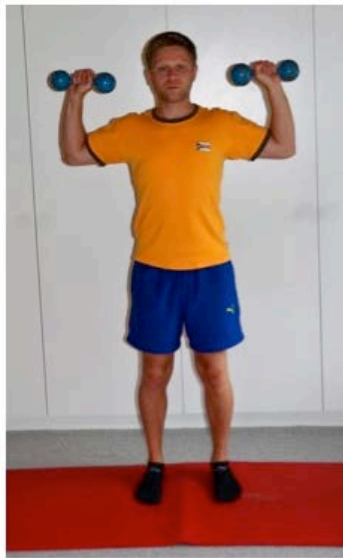

##### **Ausgangsposition**

Hüftbreit stehen; Hanteln sind bei gebeugten Armen oberhalb der Schulter; Handgelenke gerade.

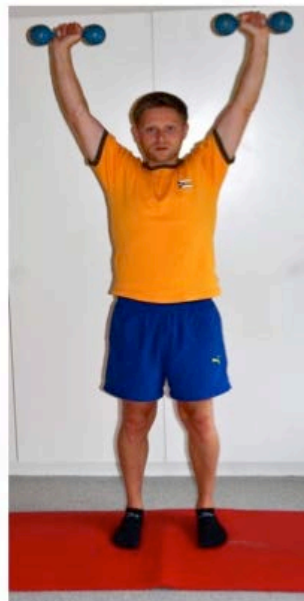

##### **Ausführung**

Arme strecken (ausatmen) und zurück in Ausgangsposition (einatmen). Die Bewegung wird ohne Schwung ausgeführt.

## Rücken- und Armmuskulatur

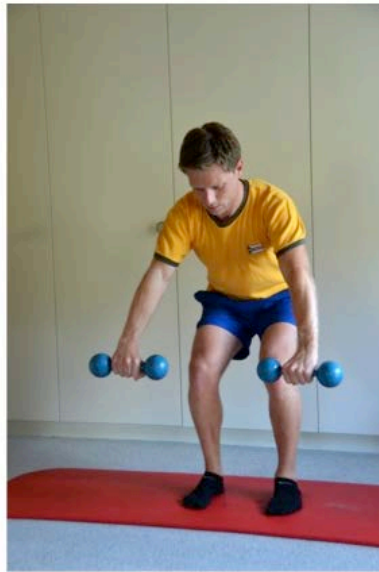

### Ausgangsposition

Hüftbreit stehen; Beine leicht gebeugt; Hanteln in Vorhalte; Rücken gerade; Arme sind fast komplett gestreckt.

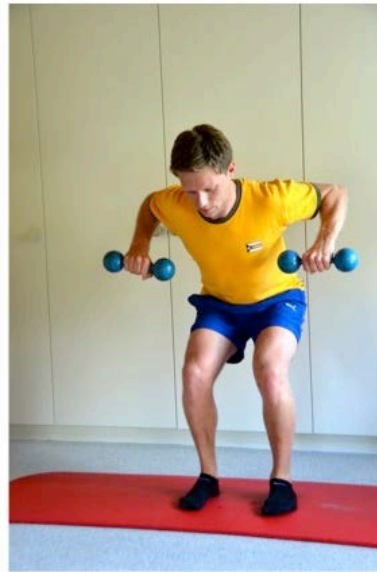

### Ausführung

Arme zum Körper heranziehen; Ellbogen beugen und diese soweit als möglich nach hinten bringen (ausatmen) und wieder zurück in die Ausgangsposition (einatmen). Die Bewegung ohne Schwung ausführen.

## Schultermuskulatur

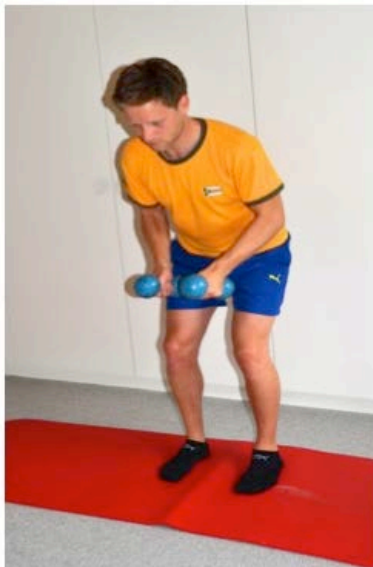

### Ausgangsposition

Hüftbreit stehen; Beine leicht gebeugt; Hanteln in Vorhalte, Rücken gerade.

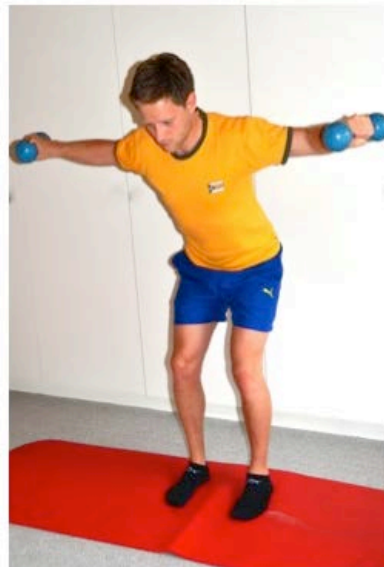

### Ausführung

Arme seitlich bis auf Schulterhöhe führen (ausatmen) und zurück in Ausgangsposition (einatmen).

## Arm- und Schultermuskulatur

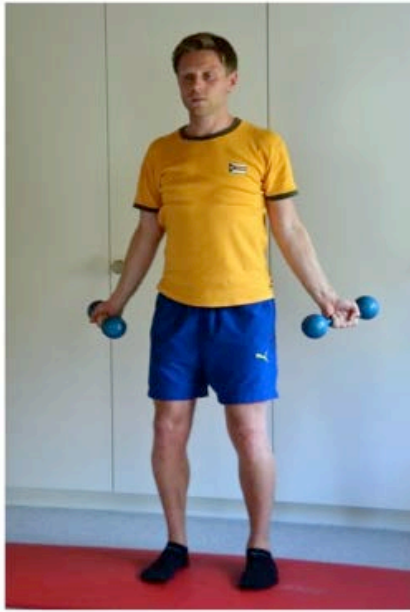

### Ausgangsposition

Hüftbreit stehen; Beine leicht gebeugt; Hanteln in Hüfthöhe; Rotieren Sie Handinnenflächen bei gestreckten Armen maximal nach aussen.

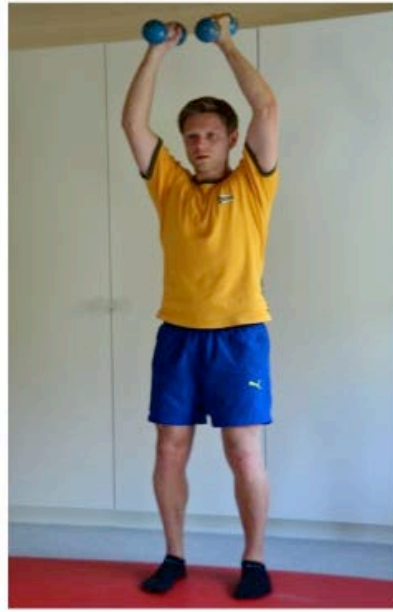

### Ausführung

Hantel langsam über dem Kopf zusammenführen (ausatmen) und zurück in die Ausgangsposition (einatmen). Ohne Schwung zu holen.

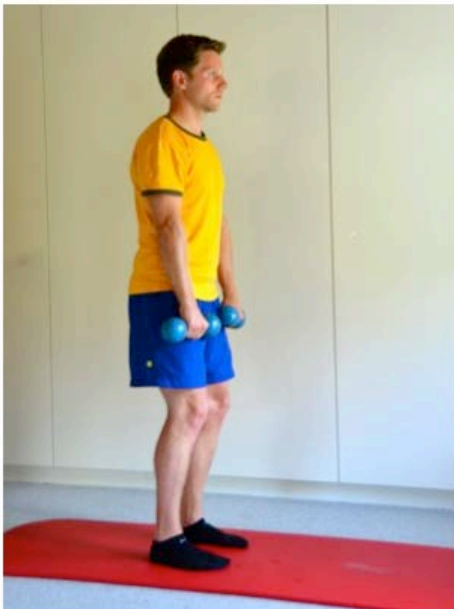

### Ausgangsposition

Hüftbreit stehen; Beine leicht gebeugt; Hanteln mit gestreckten Armen und Handinnenflächen gegen den Körper halten.

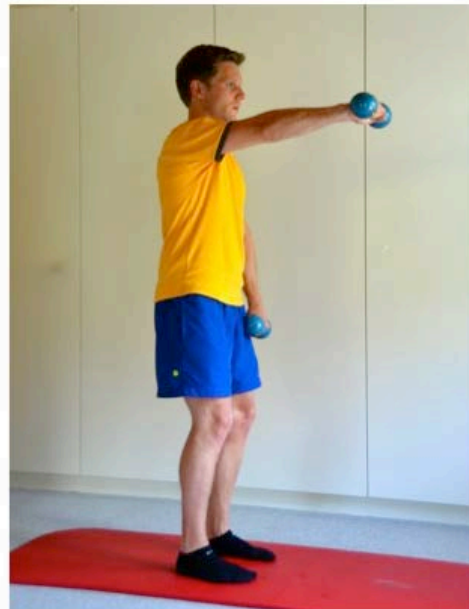

### Ausführung

Wechselseitig den gestreckten Arm bis auf Schulterhöhe (horizontal) anheben. Während der Aufwärtsbewegung ausatmen und während der Abwärtsbewegung einatmen.

## Bizepsmuskulatur (stehend)

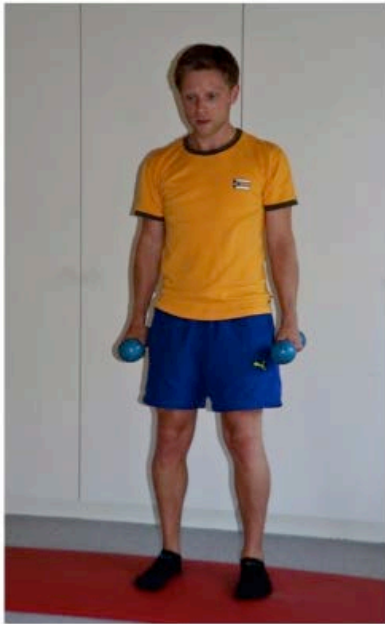

### Ausgangsposition

Hüftbreit stehen; Hanteln mit gestreckten Armen am Körper anliegend.

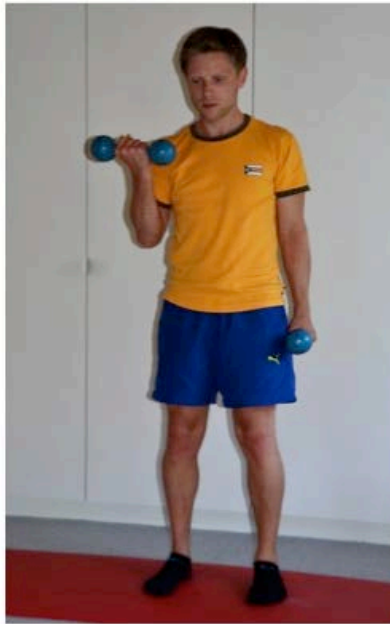

### Ausführung

Arme alternierend und maximal beugen ohne Schwung und zur Ausgangsposition zurückführen.

## Bizepsmuskulatur (sitzend)

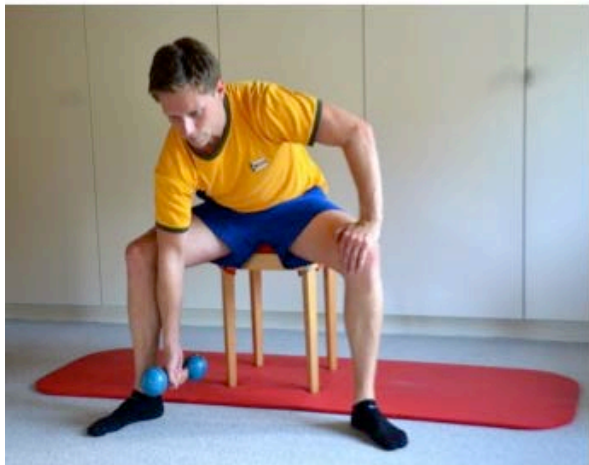

### Ausgangsposition

Ellenbogen an Knieinnenseite legen. Der passive Arm ist auf dem Oberschenkel platziert.

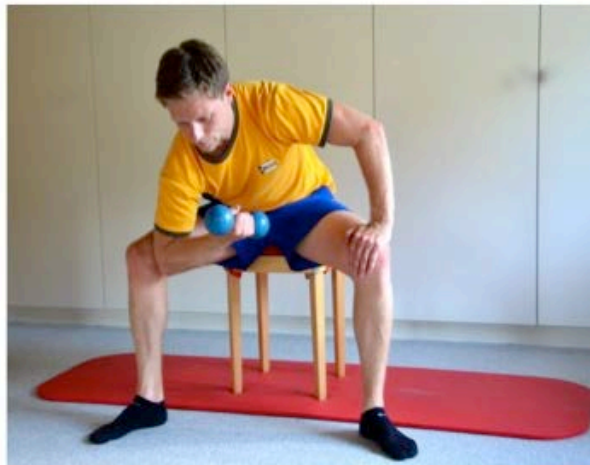

### Ausführung

Die Hantel langsam in Richtung Schulter führen durch Beugung des Ellbogens (ausatmen) und zur Ausgangsposition zurückbringen.

## Trizepsmuskulatur

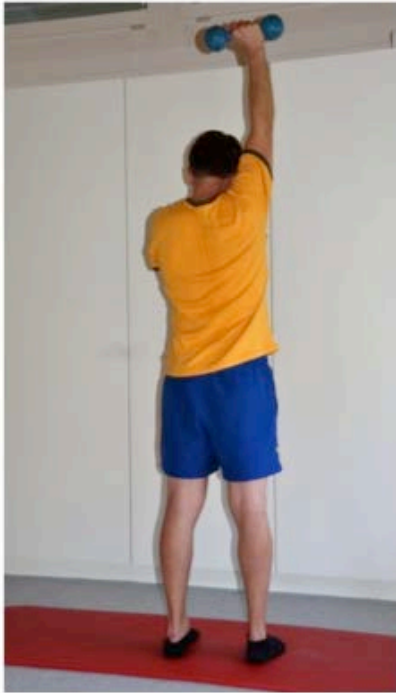

### **Ausgangsposition**

Hüftbreit stehen; Arm mit Hantel ist gestreckt. Die passive Hand kann zur Unterstützung unter der Achsel platziert werden.

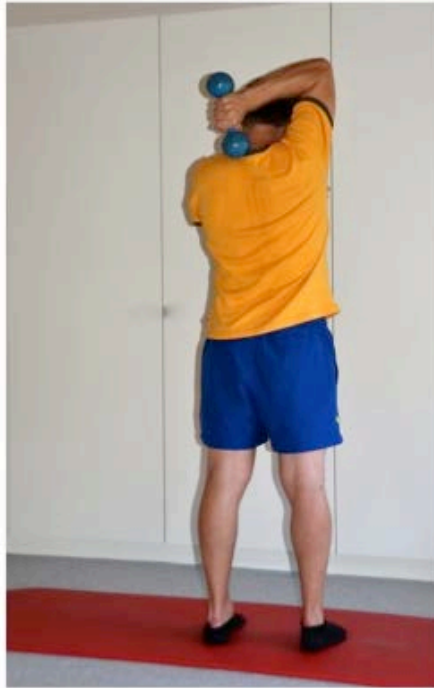

### **Ausführung**

Ellbogen beugen und die Hantel langsam Richtung Wirbelsäule führen (ausatmen) und zur Ausgangsposition zurück (einatmen). Die Bewegung kommt aus dem Unterarm – der Oberarm verbleibt in der Ausgangsposition.

## 4.5. Beinmuskulatur mit Kleinhanteln

### Ausfallschritt

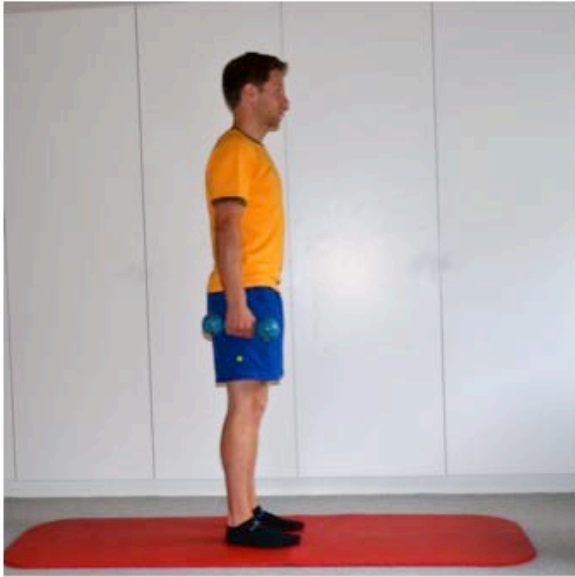

#### Ausgangsposition

Hüftbreit stehen; Arme gestreckt;  
Rücken gerade.

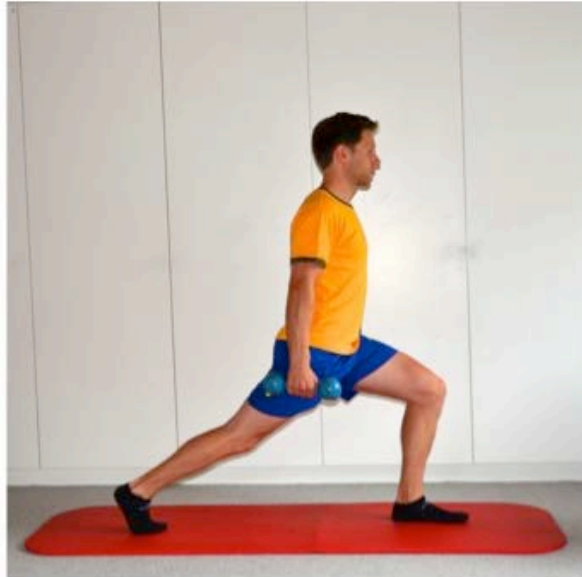

#### Ausführung

Wechelseitig Beine nach vorne  
setzen und in die Beuge gehen. Den  
Körper wieder in die Ausgangsstellung  
bringen.

## 4.6. Kombinierte Übungen mit Hanteln

### Kniebeuge mit gestreckten Armen

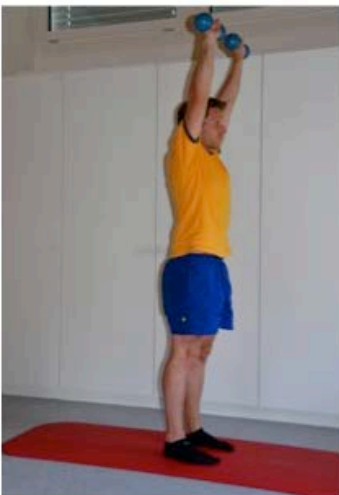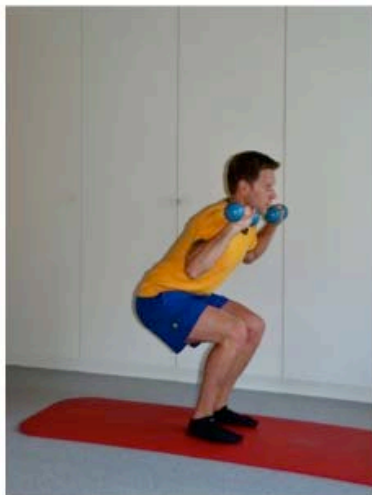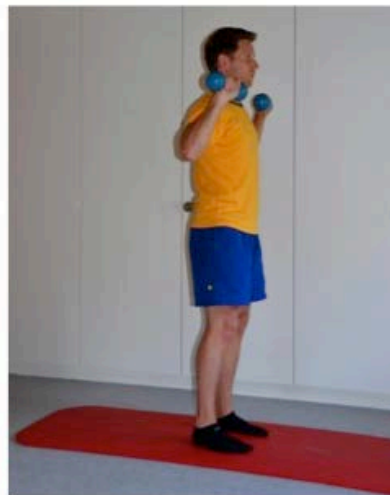

#### Ausführung

Beide Arme gestreckt; Kniebeuge mit geradem Rücken; die Hanteln bis auf Schulterhöhe mitführen. In der Aufwärtsbewegung werden die Hanteln in Richtung Decke gestemmt.



## Kniebeuge mit vorgehaltenen Armen

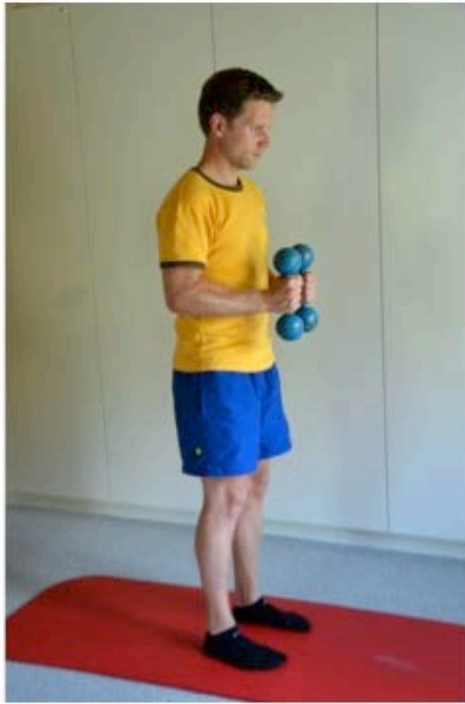

### **Ausgangsposition**

Hüftbreit stehen; Hantel vor dem Körper halten; Hand-gelenke sind gerade.

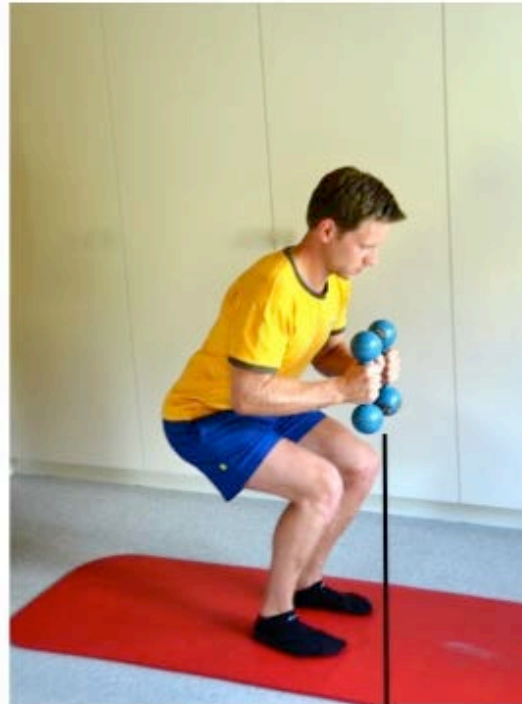

### **Ausführung**

Kniebeuge (Vorsicht Knie-winkel!) ohne Veränderung der Hantelposition.

## Liegestütz mit Hantelarbeit (hoher Schwierigkeitsgrad)

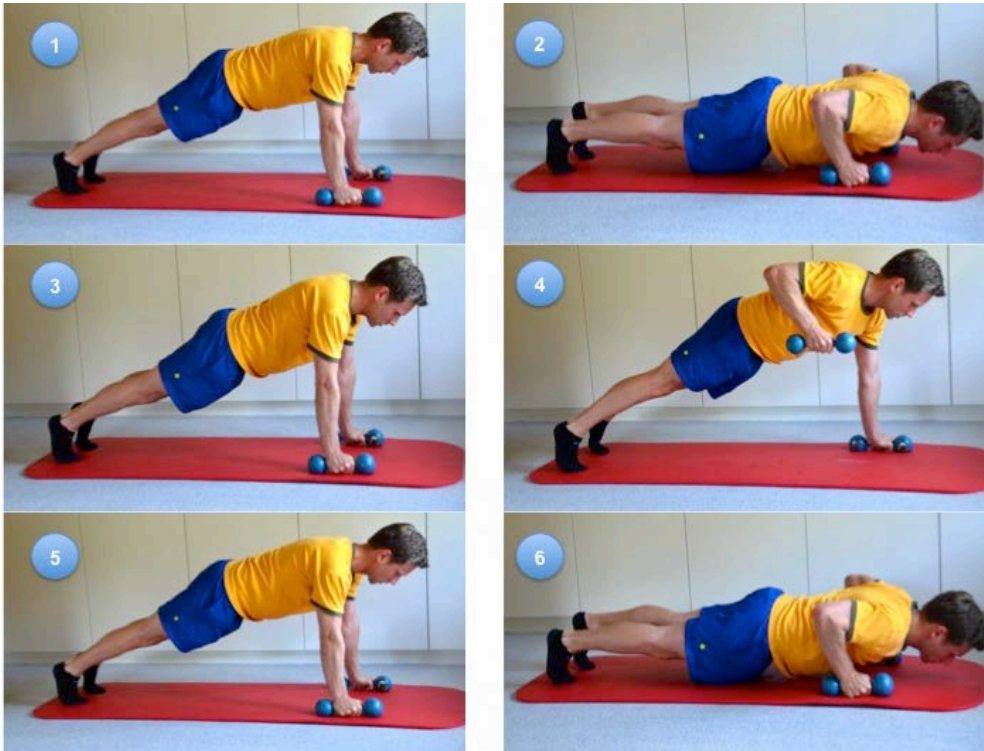

### Ausführung

Liegestützposition mit den Hanteln einnehmen (1). Eine Liegestütze ausführen (2) und zurück in die Ausgangsposition (3) kommen. Anschließend die Hantel auf einer Seite zur Brust heranziehen (4) und wieder am Boden ablegen (5). Erneut eine Liegestütze ausführen (6).

## Informationsblatt für die Physiotherapeutinnen: Einführung in die Herzfrequenzmessung für das Ausdauertraining

**Die Teilnehmenden sollten gemäss den nachfolgenden Informationen für die selbständige Herzfrequenzmessung geschult werden (Blatt wird nicht abgegeben)**

Manchmal ist es schwierig abzuschätzen, wann ein kontinuierliches ausdauerorientiertes Training als intensiv oder anstrengend bezeichnet wird. Basierend auf Ihrem Leistungstest haben wir Ihre individuelle Herzfrequenz bestimmt, die die richtige Intensität für diese Art von Aktivitäten widerspiegelt.

Ihr optimaler Trainingsbereich beginnt ab \_\_\_\_\_ Schlägen pro Minute

Es gibt verschiedene Möglichkeiten die Herzfrequenz zu bestimmen. Wenn Sie wünschen, können Sie eine Pulsuhr benutzen. Sie können Ihre Herzfrequenz aber auch ermitteln, indem Sie ihren Puls (siehe Abbildung) sofort nach dem Belastungsende während 15 Sekunden messen und das Ergebnis (Anzahl Schläge) mit 4 multiplizieren.

Damit Sie den Pulsschlag spüren benutzen Sie zwei Finger und üben leichten Druck aus.

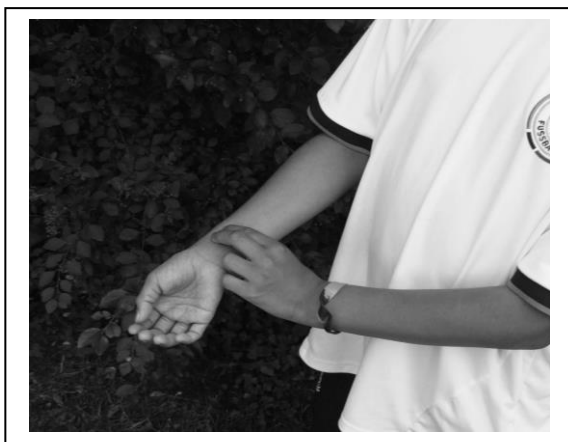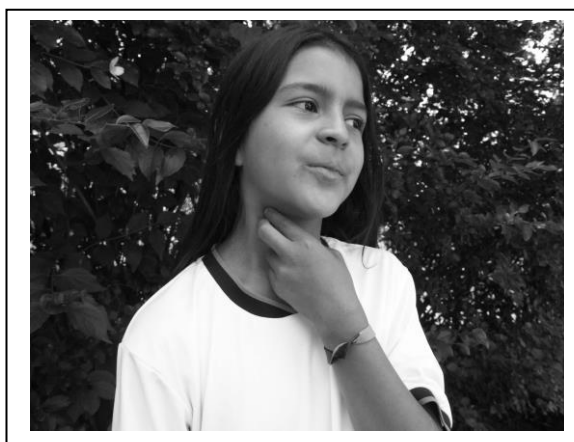

Bitte zögern Sie nicht, Ihre Physiotherapeutin zu kontaktieren, wenn Sie diesbezüglich Fragen haben.

**Strukturiertes Interview für Nachuntersuchungen und Telefonkontakte zur Erfassung der Umsetzung des vereinbarten Aktivitätsprogrammes**

ID: \_\_\_\_\_

Datum: \_\_\_\_\_

**1. Haben Sie sich in der Zeit seit dem letzten Kontakt vor \_\_\_\_\_ Wochen entsprechend der Vereinbarungen zur sportlichen Aktivität bewegt?**

Ja

Nein

**2. Jetzt werfen wir einen Blick auf Ihr Onlinetagebuch (machen Sie hier eine Übersicht und Kommentare zum Onlinetagebuch), kurze Zusammenfassung:**

---

---

---

---

---

---

---

**3. Hatten Sie seit dem letzten Termin am UKBB/dem letzten Telefonat irgendwelche Symptome?**

Nein

Ja → Falls Ja, folgende Details ausfüllen

Husten (Details):

---

Kurzatmigkeit (Details):

---

Erschöpfung (Details):

---

Schmerzen (Wo? Wann?):

---

geschwollene Gelenke (Details):

---

Herzklopfen/Herzrasen (Details):

---

Ohnmacht (Details):

---

Andere Symptome (Details):

---

---

---

---

---

**4. Waren Sie seit dem letzten Besuch zu krank um aktiv zu sein?**

Nein

Ja → Bitte geben Sie für den Zeitraum den genauen Anfang und das Ende sowie den Grund/die Erkrankung an:

---

---

---

---

**5. Denken Sie, dass Sie die im Vertrag vereinbarten Aktivitäten weiterhin durchführen können?**

Ja

Nein → Bitte geben Sie die Gründe an, wenn Sie die Aktivitäten nicht wie geplant durchführen können:

---

---

---

---

**Sofern der/die Studienteilnehmer/in Probleme mit der Umsetzung des vereinbarten Aktivitätsprogrammes hatte (Antwort "NEIN" auf Frage 1 oder weniger sportliche Aktivität als vereinbart), sollten die nachfolgenden zwei Fragen gestellt und, wenn erforderlich, Modifikationen der Vereinbarung zur sportlichen Aktivität vorgenommen und dokumentiert werden.**

**6. Ich frage Sie nun nach möglichen Gründen, weshalb Sie das Sportprogramm nicht wie vereinbart durchführen konnten. Sie können mehr als einen Grund angeben. Bitte geben Sie eine Rangordnung der Gründe an (Rangordnung mit Zahlen zu den Gründen schreiben):**

- Keine Zeit
- Keine Lust
- Zu anstrengend
- Zu krank
- Symptome während des Sports
- Andere (bitte angeben):

---

---

---

---

**7. Was schlagen Sie vor um das Ziel von \_\_\_\_\_ Stunden anstrengender Aktivitäten / Woche in Zukunft zu erreichen?**

---

---

---

---

---

---

**8. Haben Sie (als Physiotherapeutin) ein erneutes motivierendes Sportinterview durchgeführt (Form C)?**

Nein

Ja

**9. Wurde die Abmachung zum Sportprogramm verändert?**

Nein

Ja

**Zusammenfassung des Telefonkontaktes und der angepassten Vereinbarungen** (bitte senden diese Informationen als Nachricht an den Patienten mittels Nachrichtenoption des Onlinetagebuches):

---

---

---

---

---

---

---

---

---

---

---

.....  
Ort und Datum

.....  
Name Physiotherapeutin

.....  
Unterschrift Physiotherapeutin
